# Supplementary material for: Genome-wide in silico identification of glutathione S-transferase (GST) gene family members in fig (Ficus carica L.) and expression characteristics during fruit color development
Source: PeerJ. 2023 Jan 25;11:e14406. doi: 10.7717/peerj.14406 (PMC9884035; doi:10.7717/peerj.14406)
Supplement: Data S2 [file peerj-11-14406-s002.xlsx]

## Sheet: Data S2
Data S2. Primers used in this study.
Gene name	Gene ID	Forward Primer	Reverse Primer	Amplicon size (bp)
FcActin	FCD_00027279	CAATCGGTGCTGAGCGTTT	TCCTATCAAGGATGGCTGGAA	59
FcGSTF1	FCD_00001545	TCCCACCAAGCATTGACATTC	AAGAGCGGCGGCTACCT	137
FcGSTU5	FCD_00014951	TCGAAAGAGTAGAACCAGCT	AAGAACAAGAGGCACTAAAGA	148
FcGSTU6	FCD_00014954	GCCACAAGTCTCCTCTGCTT	ACAGCTGCCTTGCAAAGTTG	105
FcGSTU7	FCD_00014956	CCCTTTCGCATTCCACAACT	CTGCTTCCCTCCAACCCTTAC	105
