# Supplementary material for: Genome-wide in silico identification of glutathione S-transferase (GST) gene family members in fig (Ficus carica L.) and expression characteristics during fruit color development
Source: PeerJ. 2023 Jan 25;11:e14406. doi: 10.7717/peerj.14406 (PMC9884035; doi:10.7717/peerj.14406)
Supplement: Data S3 [file peerj-11-14406-s003.xlsx]

## Sheet: Data S3
Data S3. Comparison of GST genes among different species.
Species	Classification										Total
	Tau	Phi	DHAR	EF1Bγ	GHR	TCHQD	Theta	Lambda	MGST	Zeta
Ficus carica	42	6	0	1	0	0	1	3	0	0	53
	0.7925	0.1132		0.0189			0.0189	0.0566
Arabidopsis thaliana	28	13	4	0	0	1	2	3	0	2	53
	0.5283	0.2453	0.0755			0.0189	0.0377	0.0566		0.0377
Oryza sativa	52	17	2	2	0	1	1	0	0	4	79
	0.6582	0.2152	0.0253	0.0253		0.0127	0.0127			0.0506
Malus domestica	36	15	3	3	5	1	1	3	0	2	69
	0.5217	0.2174	0.0435	0.0435	0.0725	0.0145	0.0145	0.0435		0.029
Prunus persica	40	6	2	0	0	1	1	1	0	1	52
	0.7692	0.1154	0.0385			0.0192	0.0192	0.0192		0.0192
Cucumis melo	29	5	2	3	0	0	1	4	2	3	49
	0.5918	0.102	0.0408	0.0612			0.0204	0.0816	0.0408	0.0612
Solanum lycopersicum	57	6	6	3	2	1	4	7	2	2	90
	0.6333	0.0667	0.0667	0.0333	0.0222	0.0111	0.0444	0.0778	0.0222	0.0222
Capsicum annuum	59	6	2	2	3	1	4	4	2	2	85
	0.6941	0.0706	0.0235	0.0235	0.0353	0.0118	0.0471	0.0471	0.0235	0.0235
total	343	74	21	14	10	6	15	25	6	16	530
