# Supplementary material for: Genome-wide in silico identification of glutathione S-transferase (GST) gene family members in fig (Ficus carica L.) and expression characteristics during fruit color development
Source: PeerJ. 2023 Jan 25;11:e14406. doi: 10.7717/peerj.14406 (PMC9884035; doi:10.7717/peerj.14406)
Supplement: Data S7 [file peerj-11-14406-s007.xlsx]

## Sheet: Data S7
Data S7 Secondary structural statistics of the 53 FcGST proteins.
Subfamily	Gene name	Protein Alpha helix (%)	Extended Beta strand (%)	Beta turn (%)	Random coil (%)
Tau	FcGSTU1	0.5689	0.1156	0.0533	0.2622
	FcGSTU2	0.5571	0.1279	0.0502	0.2648
	FcGSTU3	0.5714	0.1161	0.0446	0.2679
	FcGSTU4	0.567	0.1161	0.0536	0.2634
	FcGSTU5	0.5388	0.1233	0.0548	0.2831
	FcGSTU6	0.5115	0.1475	0.0461	0.2949
	FcGSTU7	0.5409	0.1455	0.0318	0.2818
	FcGSTU8	0.5249	0.1312	0.0633	0.2805
	FcGSTU9	0.5511	0.1156	0.0756	0.2578
	FcGSTU10	0.599	0.1042	0.0573	0.2396
	FcGSTU11	0.5928	0.1131	0.0498	0.2443
	FcGSTU12	0.5134	0.1518	0.0312	0.3036
	FcGSTU13	0.5652	0.1087	0.0652	0.2609
	FcGSTU14	0.5299	0.1394	0.0518	0.2789
	FcGSTU15	0.4775	0.1685	0.0337	0.3202
	FcGSTU16	0.5652	0.1174	0.0609	0.2565
	FcGSTU17	0.5536	0.1071	0.0312	0.308
	FcGSTU18	0.5929	0.1062	0.0398	0.2611
	FcGSTU19	0.2812	0.2604	0.0833	0.375
	FcGSTU20	0.5446	0.125	0.0536	0.2768
	FcGSTU21	0.6061	0.1126	0.039	0.2424
	FcGSTU22	0.5113	0.1267	0.0543	0.3077
	FcGSTU23	0.5	0.1532	0.0676	0.2793
	FcGSTU24	0.3776	0.2403	0.0915	0.2906
	FcGSTU25	0.5714	0.1593	0.0549	0.2143
	FcGSTU26	0.5114	0.1142	0.0594	0.3151
	FcGSTU27	0.5571	0.1324	0.0274	0.2831
	FcGSTU28	0.524	0.131	0.0349	0.31
	FcGSTU29	0.4627	0.1642	0.056	0.3172
	FcGSTU30	0.516	0.137	0.0639	0.2831
	FcGSTU31	0.5283	0.0896	0.0283	0.3538
	FcGSTU32	0.4918	0.1585	0.071	0.2787
	FcGSTU33	0.49	0.135	0.03	0.345
	FcGSTU34	0.4966	0.1611	0.0537	0.2886
	FcGSTU35	0.5598	0.141	0.0342	0.265
	FcGSTU36	0.6036	0.1361	0.0651	0.1953
	FcGSTU37	0.5631	0.1261	0.0631	0.2477
	FcGSTU38	0.5325	0.122	0.0528	0.2927
	FcGSTU39	0.4085	0.2183	0.0704	0.3028
	FcGSTU40	0.5385	0.1131	0.0588	0.2896
	FcGSTU41	0.531	0.1283	0.0398	0.3009
	FcGSTU42	0.5	0.1189	0.0246	0.3566
Phi	FcGSTF1	0.486	0.1402	0.0654	0.3084
	FcGSTF2	0.457	0.1267	0.0588	0.3575
	FcGSTF3	0.4695	0.1549	0.0845	0.2911
	FcGSTF4	0.446	0.1831	0.0704	0.3005
	FcGSTF5	0.3937	0.1267	0.0633	0.4163
	FcGSTF6	0.4484	0.1525	0.0717	0.3274
Lambda	FcGSTL1	0.4773	0.0985	0.0417	0.3826
	FcGSTL2	0.4492	0.1017	0.0381	0.411
	FcGSTL3	0.4874	0.1134	0.0336	0.3655
Theta	FcGSTT1	0.5275	0.1032	0.055	0.3142
EF1Bγ	FcEF1Bγ1	0.4498	0.0884	0.0522	0.4096
