# Supplementary material for: Genome-wide in silico identification of glutathione S-transferase (GST) gene family members in fig (Ficus carica L.) and expression characteristics during fruit color development
Source: PeerJ. 2023 Jan 25;11:e14406. doi: 10.7717/peerj.14406 (PMC9884035; doi:10.7717/peerj.14406)
Supplement: Data S8 [file peerj-11-14406-s008.xlsx]

## Sheet: Data S8
Data S8 Validation of predicted 3D models.
Gene Name	Template	Seq Identity	GMQE	QMEAN	Verify3D	ERRAT score
FcGSTU2	4j2f.1.A	0.4676	0.81	-1.31	0.9372	94.1606
FcGSTU5	5g5a.1.A	0.6193	0.83	-0.33	0.9633	95.7041
FcGSTU23	4top.1.A	0.633	0.83	-0.74	0.8687	91.2736
FcGSTF1	5f07.1.A	0.7238	0.92	-0.08	0.8626	98.5185
FcGSTL1	4pqh.1.A	0.7009	0.77	-0.34	0.9346	100
