# Supplementary material for: Genome-wide in silico identification of glutathione S-transferase (GST) gene family members in fig (Ficus carica L.) and expression characteristics during fruit color development
Source: PeerJ. 2023 Jan 25;11:e14406. doi: 10.7717/peerj.14406 (PMC9884035; doi:10.7717/peerj.14406)
Supplement: Data S10 [file peerj-11-14406-s010.xls]

## Sheet: Data S10
Data S10 Detailed information of cis-acting elements in FcGST promoter regions.
Order	Category	Gene_ID	Element_name	Sequence	Postion	Length	Strand	Annotation
1	stress	FcGSTU36	ARE	AAACCA	160	6	+	Zea mays
2	stress	FcGSTU36	ARE	AAACCA	1103	6	-	Zea mays
3	stress	FcGSTU36	ARE	AAACCA	1531	6	-	Zea mays
4	stress	FcGSTU36	ARE	AAACCA	1744	6	-	Zea mays
5	stress	FcGSTU36	ARE	AAACCA	1758	6	-	Zea mays
6	stress	FcGSTU37	ARE	AAACCA	1089	6	-	Zea mays
7	stress	FcGSTU37	ARE	AAACCA	1972	6	+	Zea mays
8	stress	FcGSTU37	ARE	AAACCA	1986	6	+	Zea mays
9	stress	FcGSTU8	ARE	AAACCA	200	6	-	Zea mays
10	stress	FcGSTU8	ARE	AAACCA	1625	6	+	Zea mays
11	stress	FcGSTU8	ARE	AAACCA	1885	6	+	Zea mays
12	stress	FcGSTF1	ARE	AAACCA	1042	6	-	Zea mays
13	stress	FcGSTL2	ARE	AAACCA	198	6	+	Zea mays
14	stress	FcGSTL2	ARE	AAACCA	957	6	-	Zea mays
15	stress	FcGSTL3	ARE	AAACCA	118	6	+	Zea mays
16	stress	FcGSTL3	ARE	AAACCA	159	6	+	Zea mays
17	stress	FcGSTL3	ARE	AAACCA	237	6	+	Zea mays
18	stress	FcGSTL3	ARE	AAACCA	1641	6	-	Zea mays
19	stress	FcGSTF3	ARE	AAACCA	1969	6	+	Zea mays
20	stress	FcGSTF3	ARE	AAACCA	1974	6	+	Zea mays
21	stress	FcGSTF4	ARE	AAACCA	1038	6	+	Zea mays
22	stress	FcGSTF4	ARE	AAACCA	1482	6	-	Zea mays
23	stress	FcGSTF4	ARE	AAACCA	1969	6	+	Zea mays
24	stress	FcGSTF4	ARE	AAACCA	1974	6	+	Zea mays
25	stress	FcGSTF6	ARE	AAACCA	321	6	+	Zea mays
26	stress	FcGSTF6	ARE	AAACCA	882	6	+	Zea mays
27	stress	FcGSTU19	ARE	AAACCA	926	6	-	Zea mays
28	stress	FcGSTU19	ARE	AAACCA	1085	6	+	Zea mays
29	stress	FcGSTU20	ARE	AAACCA	127	6	-	Zea mays
30	stress	FcGSTU20	ARE	AAACCA	945	6	-	Zea mays
31	stress	FcGSTL1	ARE	AAACCA	1604	6	-	Zea mays
32	stress	FcEF1Bγ1	ARE	AAACCA	165	6	-	Zea mays
33	stress	FcEF1Bγ1	ARE	AAACCA	1378	6	+	Zea mays
34	stress	FcEF1Bγ1	ARE	AAACCA	1402	6	-	Zea mays
35	stress	FcGSTU38	ARE	AAACCA	1751	6	-	Zea mays
36	stress	FcGSTU38	ARE	AAACCA	2008	6	+	Zea mays
37	stress	FcGSTU39	ARE	AAACCA	30	6	-	Zea mays
38	stress	FcGSTU40	ARE	AAACCA	696	6	-	Zea mays
39	stress	FcGSTU40	ARE	AAACCA	812	6	-	Zea mays
40	stress	FcGSTU40	ARE	AAACCA	832	6	-	Zea mays
41	stress	FcGSTU40	ARE	AAACCA	2008	6	+	Zea mays
42	stress	FcGSTU41	ARE	AAACCA	1643	6	+	Zea mays
43	stress	FcGSTU41	ARE	AAACCA	1926	6	+	Zea mays
44	stress	FcGSTU42	ARE	AAACCA	1992	6	+	Zea mays
45	stress	FcGSTU5	ARE	AAACCA	24	6	+	Zea mays
46	stress	FcGSTU5	ARE	AAACCA	1196	6	+	Zea mays
47	stress	FcGSTU7	ARE	AAACCA	251	6	-	Zea mays
48	stress	FcGSTU7	ARE	AAACCA	948	6	-	Zea mays
49	stress	FcGSTU22	ARE	AAACCA	661	6	+	Zea mays
50	stress	FcGSTU22	ARE	AAACCA	1762	6	+	Zea mays
51	stress	FcGSTU23	ARE	AAACCA	750	6	+	Zea mays
52	stress	FcGSTU23	ARE	AAACCA	815	6	-	Zea mays
53	stress	FcGSTU23	ARE	AAACCA	855	6	-	Zea mays
54	stress	FcGSTU25	ARE	AAACCA	655	6	+	Zea mays
55	stress	FcGSTU25	ARE	AAACCA	1735	6	+	Zea mays
56	stress	FcGSTU26	ARE	AAACCA	232	6	-	Zea mays
57	stress	FcGSTU27	ARE	AAACCA	47	6	+	Zea mays
58	stress	FcGSTU27	ARE	AAACCA	108	6	+	Zea mays
59	stress	FcGSTU27	ARE	AAACCA	207	6	+	Zea mays
60	stress	FcGSTU27	ARE	AAACCA	368	6	+	Zea mays
61	stress	FcGSTU27	ARE	AAACCA	430	6	+	Zea mays
62	stress	FcGSTU27	ARE	AAACCA	530	6	+	Zea mays
63	stress	FcGSTU27	ARE	AAACCA	591	6	+	Zea mays
64	stress	FcGSTU27	ARE	AAACCA	691	6	+	Zea mays
65	stress	FcGSTU27	ARE	AAACCA	752	6	+	Zea mays
66	stress	FcGSTU28	ARE	AAACCA	746	6	-	Zea mays
67	stress	FcGSTU28	ARE	AAACCA	987	6	+	Zea mays
68	stress	FcGSTU28	ARE	AAACCA	1273	6	-	Zea mays
69	stress	FcGSTU30	ARE	AAACCA	1802	6	+	Zea mays
70	stress	FcGSTU31	ARE	AAACCA	597	6	+	Zea mays
71	stress	FcGSTU31	ARE	AAACCA	1181	6	+	Zea mays
72	stress	FcGSTU31	ARE	AAACCA	1351	6	+	Zea mays
73	stress	FcGSTU32	ARE	AAACCA	771	6	-	Zea mays
74	stress	FcGSTU32	ARE	AAACCA	1014	6	+	Zea mays
75	stress	FcGSTU32	ARE	AAACCA	1304	6	-	Zea mays
76	stress	FcGSTU33	ARE	AAACCA	752	6	+	Zea mays
77	stress	FcGSTU33	ARE	AAACCA	2003	6	+	Zea mays
78	stress	FcGSTU35	ARE	AAACCA	129	6	-	Zea mays
79	stress	FcGSTU35	ARE	AAACCA	1060	6	-	Zea mays
80	stress	FcGSTU35	ARE	AAACCA	1510	6	+	Zea mays
81	stress	FcGSTU35	ARE	AAACCA	1525	6	+	Zea mays
82	stress	FcGSTU12	ARE	AAACCA	314	6	-	Zea mays
83	stress	FcGSTU13	ARE	AAACCA	162	6	+	Zea mays
84	stress	FcGSTU13	ARE	AAACCA	198	6	-	Zea mays
85	stress	FcGSTU13	ARE	AAACCA	467	6	-	Zea mays
86	stress	FcGSTU13	ARE	AAACCA	1643	6	+	Zea mays
87	stress	FcGSTU14	ARE	AAACCA	1092	6	-	Zea mays
88	stress	FcGSTU15	ARE	AAACCA	127	6	-	Zea mays
89	stress	FcGSTU16	ARE	AAACCA	1233	6	-	Zea mays
90	stress	FcGSTU16	ARE	AAACCA	1602	6	-	Zea mays
91	stress	FcGSTU2	ARE	AAACCA	491	6	-	Zea mays
92	stress	FcGSTU2	ARE	AAACCA	899	6	+	Zea mays
93	stress	FcGSTU2	ARE	AAACCA	1182	6	+	Zea mays
94	stress	FcGSTU2	ARE	AAACCA	1404	6	-	Zea mays
95	stress	FcGSTU2	ARE	AAACCA	1485	6	+	Zea mays
96	stress	FcGSTU2	ARE	AAACCA	1636	6	-	Zea mays
97	stress	FcGSTU2	ARE	AAACCA	2002	6	+	Zea mays
98	stress	FcGSTU3	ARE	AAACCA	1708	6	+	Zea mays
99	stress	FcGSTU4	ARE	AAACCA	582	6	-	Zea mays
100	stress	FcGSTU4	ARE	AAACCA	1772	6	+	Zea mays
101	stress	FcGSTU4	ARE	AAACCA	1985	6	+	Zea mays
102	stress	FcGSTU21	ARE	AAACCA	627	6	-	Zea mays
103	stress	FcGSTU21	ARE	AAACCA	1218	6	+	Zea mays
104	stress	FcGSTU18	ARE	AAACCA	27	6	-	Zea mays
105	stress	FcGSTU18	ARE	AAACCA	727	6	+	Zea mays
106	stress	FcGSTU18	ARE	AAACCA	983	6	+	Zea mays
107	stress	FcGSTT1	ARE	AAACCA	826	6	+	Zea mays
108	stress	FcGSTT1	ARE	AAACCA	907	6	+	Zea mays
109	stress	FcGSTU1	ARE	AAACCA	1170	6	-	Zea mays
110	stress	FcGSTU1	ARE	AAACCA	1602	6	-	Zea mays
111	stress	FcGSTU9	ARE	AAACCA	652	6	-	Zea mays
112	stress	FcGSTU9	ARE	AAACCA	1070	6	-	Zea mays
113	stress	FcGSTF1	GC-motif	CCCCCG	897	6	+	Zea mays
114	stress	FcGSTL3	GC-motif	CCCCCG	400	6	-	Zea mays
115	stress	FcGSTU19	GC-motif	CCCCCG	564	6	+	Zea mays
116	stress	FcGSTU40	GC-motif	CCCCCG	513	6	+	Zea mays
117	stress	FcGSTU7	GC-motif	CCCCCG	403	6	+	Zea mays
118	stress	FcGSTU7	GC-motif	CCCCCG	1433	6	-	Zea mays
119	stress	FcGSTU25	GC-motif	CCCCCG	27	6	-	Zea mays
120	stress	FcGSTU28	GC-motif	CCCCCG	1327	6	-	Zea mays
121	stress	FcGSTU31	GC-motif	CCCCCG	874	6	-	Zea mays
122	stress	FcGSTU10	GC-motif	CCCCCG	81	6	-	Zea mays
123	stress	FcGSTU10	GC-motif	CCCCCG	114	6	-	Zea mays
124	stress	FcGSTU10	GC-motif	CCCCCG	160	6	-	Zea mays
125	stress	FcGSTU10	GC-motif	CCCCCG	197	6	-	Zea mays
126	stress	FcGSTU10	GC-motif	CCCCCG	296	6	-	Zea mays
127	stress	FcGSTU10	GC-motif	CCCCCG	761	6	-	Zea mays
128	stress	FcGSTU10	GC-motif	CCCCCG	1444	6	+	Zea mays
129	stress	FcGSTU11	GC-motif	CCCCCG	221	6	-	Zea mays
130	stress	FcGSTU11	GC-motif	CCCCCG	755	6	-	Zea mays
131	stress	FcGSTU11	GC-motif	CCCCCG	1437	6	+	Zea mays
132	stress	FcGSTU3	GC-motif	CCCCCG	1136	6	-	Zea mays
133	stress	FcGSTU4	GC-motif	CCCCCG	989	6	+	Zea mays
134	stress	FcGSTU21	GC-motif	CCCCCG	1241	6	+	Zea mays
135	stress	FcGSTU8	LTR	CCGAAA	731	6	+	Hordeum vulgare
136	stress	FcGSTF1	LTR	CCGAAA	1514	6	+	Hordeum vulgare
137	stress	FcGSTF1	LTR	CCGAAA	1648	6	+	Hordeum vulgare
138	stress	FcGSTF2	LTR	CCGAAA	1827	6	-	Hordeum vulgare
139	stress	FcGSTL3	LTR	CCGAAA	1363	6	+	Hordeum vulgare
140	stress	FcGSTF6	LTR	CCGAAA	755	6	+	Hordeum vulgare
141	stress	FcGSTF6	LTR	CCGAAA	1110	6	+	Hordeum vulgare
142	stress	FcGSTL1	LTR	CCGAAA	168	6	-	Hordeum vulgare
143	stress	FcGSTL1	LTR	CCGAAA	1317	6	-	Hordeum vulgare
144	stress	FcEF1Bγ1	LTR	CCGAAA	1689	6	+	Hordeum vulgare
145	stress	FcGSTU39	LTR	CCGAAA	499	6	+	Hordeum vulgare
146	stress	FcGSTU42	LTR	CCGAAA	217	6	-	Hordeum vulgare
147	stress	FcGSTU23	LTR	CCGAAA	1908	6	+	Hordeum vulgare
148	stress	FcGSTU27	LTR	CCGAAA	1917	6	+	Hordeum vulgare
149	stress	FcGSTU28	LTR	CCGAAA	1908	6	+	Hordeum vulgare
150	stress	FcGSTU30	LTR	CCGAAA	1953	6	-	Hordeum vulgare
151	stress	FcGSTU32	LTR	CCGAAA	1908	6	+	Hordeum vulgare
152	stress	FcGSTU34	LTR	CCGAAA	1771	6	+	Hordeum vulgare
153	stress	FcGSTU10	LTR	CCGAAA	650	6	-	Hordeum vulgare
154	stress	FcGSTU14	LTR	CCGAAA	549	6	-	Hordeum vulgare
155	stress	FcGSTU17	LTR	CCGAAA	125	6	+	Hordeum vulgare
156	stress	FcGSTU4	LTR	CCGAAA	813	6	+	Hordeum vulgare
157	stress	FcGSTT1	LTR	CCGAAA	326	6	-	Hordeum vulgare
158	stress	FcGSTT1	LTR	CCGAAA	904	6	+	Hordeum vulgare
159	stress	FcGSTT1	LTR	CCGAAA	1018	6	+	Hordeum vulgare
160	stress	FcGSTT1	LTR	CCGAAA	1173	6	+	Hordeum vulgare
161	stress	FcGSTU37	MBS	CAACTG	378	6	+	Arabidopsis thaliana
162	stress	FcGSTU8	MBS	CAACTG	838	6	-	Arabidopsis thaliana
163	stress	FcGSTF2	MBS	CAACTG	258	6	+	Arabidopsis thaliana
164	stress	FcGSTF2	MBS	CAACTG	650	6	+	Arabidopsis thaliana
165	stress	FcGSTL3	MBS	CAACTG	1757	6	-	Arabidopsis thaliana
166	stress	FcGSTF5	MBS	CAACTG	609	6	+	Arabidopsis thaliana
167	stress	FcGSTU19	MBS	CAACTG	647	6	+	Arabidopsis thaliana
168	stress	FcGSTU20	MBS	CAACTG	1771	6	-	Arabidopsis thaliana
169	stress	FcGSTL1	MBS	CAACTG	1267	6	-	Arabidopsis thaliana
170	stress	FcGSTL1	MBS	CAACTG	1961	6	-	Arabidopsis thaliana
171	stress	FcGSTU39	MBS	CAACTG	26	6	-	Arabidopsis thaliana
172	stress	FcGSTU40	MBS	CAACTG	1045	6	-	Arabidopsis thaliana
173	stress	FcGSTU7	MBS	CAACTG	176	6	-	Arabidopsis thaliana
174	stress	FcGSTU7	MBS	CAACTG	368	6	-	Arabidopsis thaliana
175	stress	FcGSTU7	MBS	CAACTG	1119	6	-	Arabidopsis thaliana
176	stress	FcGSTU27	MBS	CAACTG	1323	6	+	Arabidopsis thaliana
177	stress	FcGSTU28	MBS	CAACTG	1996	6	-	Arabidopsis thaliana
178	stress	FcGSTU31	MBS	CAACTG	928	6	+	Arabidopsis thaliana
179	stress	FcGSTU34	MBS	CAACTG	1114	6	-	Arabidopsis thaliana
180	stress	FcGSTU11	MBS	CAACTG	1045	6	+	Arabidopsis thaliana
181	stress	FcGSTU12	MBS	CAACTG	1267	6	+	Arabidopsis thaliana
182	stress	FcGSTU14	MBS	CAACTG	1710	6	-	Arabidopsis thaliana
183	stress	FcGSTU16	MBS	CAACTG	909	6	-	Arabidopsis thaliana
184	stress	FcGSTU17	MBS	CAACTG	1360	6	+	Arabidopsis thaliana
185	stress	FcGSTU4	MBS	CAACTG	104	6	-	Arabidopsis thaliana
186	stress	FcGSTU4	MBS	CAACTG	201	6	+	Arabidopsis thaliana
187	stress	FcGSTU18	MBS	CAACTG	1180	6	-	Arabidopsis thaliana
188	stress	FcGSTU36	MYC	CATTTG	74	6	+	Arabidopsis thaliana
189	stress	FcGSTU36	MYC	CATGTG	246	6	+	Arabidopsis thaliana
190	stress	FcGSTU36	MYC	CAATTG	1527	6	-	Arabidopsis thaliana
191	stress	FcGSTU36	MYC	CATTTG	1714	6	+	Arabidopsis thaliana
192	stress	FcGSTU36	Myc	TCTCTTA	712	7	+	Arabidopsis thaliana
193	stress	FcGSTU36	Myc	TCTCTTA	807	7	-	Arabidopsis thaliana
194	stress	FcGSTU36	Myc	TCTCTTA	1585	7	-	Arabidopsis thaliana
195	stress	FcGSTU37	Myc	TCTCTTA	1097	7	+	Arabidopsis thaliana
196	stress	FcGSTU37	MYC	CATGTG	105	6	+	Arabidopsis thaliana
197	stress	FcGSTU37	MYC	CAATTG	1406	6	-	Arabidopsis thaliana
198	stress	FcGSTU37	MYC	CATTTG	1428	6	+	Arabidopsis thaliana
199	stress	FcGSTU8	MYC	CATTTG	796	6	+	Arabidopsis thaliana
200	stress	FcGSTU8	Myc	TCTCTTA	53	7	+	Arabidopsis thaliana
201	stress	FcGSTU8	Myc	TCTCTTA	81	7	+	Arabidopsis thaliana
202	stress	FcGSTU8	Myc	TCTCTTA	1698	7	-	Arabidopsis thaliana
203	stress	FcGSTF1	MYC	CATGTG	88	6	-	Arabidopsis thaliana
204	stress	FcGSTF1	MYC	CAATTG	281	6	+	Arabidopsis thaliana
205	stress	FcGSTF2	MYC	CATTTG	375	6	-	Arabidopsis thaliana
206	stress	FcGSTL3	MYC	CATTTG	34	6	+	Arabidopsis thaliana
207	stress	FcGSTL3	MYC	CATTTG	265	6	+	Arabidopsis thaliana
208	stress	FcGSTL3	MYC	CATTTG	1252	6	-	Arabidopsis thaliana
209	stress	FcGSTF3	MYC	CATTTG	1848	6	-	Arabidopsis thaliana
210	stress	FcGSTF4	MYC	CATGTG	312	6	-	Arabidopsis thaliana
211	stress	FcGSTF4	MYC	CATTTG	978	6	-	Arabidopsis thaliana
212	stress	FcGSTF4	MYC	CATTTG	1847	6	-	Arabidopsis thaliana
213	stress	FcGSTF4	MYC	CATTTG	1942	6	+	Arabidopsis thaliana
214	stress	FcGSTF5	MYC	CATGTG	1420	6	-	Arabidopsis thaliana
215	stress	FcGSTF6	MYC	CATGTG	1351	6	+	Arabidopsis thaliana
216	stress	FcGSTU19	MYC	CATTTG	291	6	+	Arabidopsis thaliana
217	stress	FcGSTU19	MYC	CATGTG	1676	6	-	Arabidopsis thaliana
218	stress	FcGSTU19	MYC	CATGTG	1696	6	-	Arabidopsis thaliana
219	stress	FcGSTU19	MYC	CATGTG	1705	6	-	Arabidopsis thaliana
220	stress	FcGSTU19	MYC	CATGTG	1956	6	-	Arabidopsis thaliana
221	stress	FcGSTU20	MYC	CATGTG	1056	6	+	Arabidopsis thaliana
222	stress	FcGSTU20	MYC	CATTTG	1712	6	-	Arabidopsis thaliana
223	stress	FcGSTL1	MYC	CATGTG	1201	6	-	Arabidopsis thaliana
224	stress	FcGSTL1	MYC	CATTTG	1429	6	+	Arabidopsis thaliana
225	stress	FcEF1Bγ1	MYC	CATTTG	677	6	+	Arabidopsis thaliana
226	stress	FcEF1Bγ1	MYC	CATTTG	704	6	+	Arabidopsis thaliana
227	stress	FcEF1Bγ1	MYC	CATTTG	755	6	+	Arabidopsis thaliana
228	stress	FcEF1Bγ1	MYC	CATTTG	782	6	+	Arabidopsis thaliana
229	stress	FcGSTU38	MYC	CAATTG	715	6	+	Arabidopsis thaliana
230	stress	FcGSTU38	MYC	CATTTG	1079	6	-	Arabidopsis thaliana
231	stress	FcGSTU38	MYC	CATGTG	1596	6	-	Arabidopsis thaliana
232	stress	FcGSTU38	MYC	CATGTG	1608	6	+	Arabidopsis thaliana
233	stress	FcGSTU39	MYC	CATTTG	798	6	+	Arabidopsis thaliana
234	stress	FcGSTU39	MYC	CATGTG	1754	6	-	Arabidopsis thaliana
235	stress	FcGSTU39	MYC	CAATTG	1776	6	-	Arabidopsis thaliana
236	stress	FcGSTU40	MYC	CATTTG	1539	6	+	Arabidopsis thaliana
237	stress	FcGSTU40	MYC	CATGTG	1611	6	-	Arabidopsis thaliana
238	stress	FcGSTU40	MYC	CATGTG	1623	6	+	Arabidopsis thaliana
239	stress	FcGSTU41	MYC	CATGTG	251	6	-	Arabidopsis thaliana
240	stress	FcGSTU41	MYC	CATGTG	1254	6	+	Arabidopsis thaliana
241	stress	FcGSTU42	Myc	TCTCTTA	181	7	-	Arabidopsis thaliana
242	stress	FcGSTU42	Myc	TCTCTTA	642	7	+	Arabidopsis thaliana
243	stress	FcGSTU42	MYC	CAATTG	238	6	+	Arabidopsis thaliana
244	stress	FcGSTU42	MYC	CATTTG	685	6	-	Arabidopsis thaliana
245	stress	FcGSTU5	MYC	CAATTG	173	6	+	Arabidopsis thaliana
246	stress	FcGSTU5	MYC	CATTTG	1500	6	+	Arabidopsis thaliana
247	stress	FcGSTU5	MYC	CATTTG	1928	6	+	Arabidopsis thaliana
248	stress	FcGSTU6	MYC	CAATTG	100	6	+	Arabidopsis thaliana
249	stress	FcGSTU6	MYC	CATTTG	461	6	+	Arabidopsis thaliana
250	stress	FcGSTU6	MYC	CATTTG	524	6	-	Arabidopsis thaliana
251	stress	FcGSTU6	MYC	CATGTG	924	6	-	Arabidopsis thaliana
252	stress	FcGSTU6	MYC	CATGTG	935	6	-	Arabidopsis thaliana
253	stress	FcGSTU6	MYC	CATTTG	1410	6	+	Arabidopsis thaliana
254	stress	FcGSTU6	MYC	CATTTG	1937	6	+	Arabidopsis thaliana
255	stress	FcGSTU7	Myc	TCTCTTA	930	7	+	Arabidopsis thaliana
256	stress	FcGSTU7	Myc	TCTCTTA	1628	7	-	Arabidopsis thaliana
257	stress	FcGSTU7	MYC	CATTTG	1238	6	+	Arabidopsis thaliana
258	stress	FcGSTU7	MYC	CATGTG	1250	6	+	Arabidopsis thaliana
259	stress	FcGSTU7	MYC	CATGTG	1601	6	-	Arabidopsis thaliana
260	stress	FcGSTU7	MYC	CATTTG	1871	6	+	Arabidopsis thaliana
261	stress	FcGSTU7	MYC	CATTTG	1930	6	+	Arabidopsis thaliana
262	stress	FcGSTU22	MYC	CATTTG	1258	6	+	Arabidopsis thaliana
263	stress	FcGSTU23	MYC	CATGTG	339	6	-	Arabidopsis thaliana
264	stress	FcGSTU23	MYC	CATTTG	927	6	-	Arabidopsis thaliana
265	stress	FcGSTU23	MYC	CATGTG	1148	6	-	Arabidopsis thaliana
266	stress	FcGSTU23	MYC	CATTTG	1243	6	+	Arabidopsis thaliana
267	stress	FcGSTU24	MYC	CATTTG	1113	6	-	Arabidopsis thaliana
268	stress	FcGSTU24	MYC	CATTTG	1143	6	+	Arabidopsis thaliana
269	stress	FcGSTU26	MYC	CAATTG	971	6	+	Arabidopsis thaliana
270	stress	FcGSTU27	MYC	CATGTG	1343	6	-	Arabidopsis thaliana
271	stress	FcGSTU27	MYC	CATTTG	1710	6	-	Arabidopsis thaliana
272	stress	FcGSTU28	MYC	CATTTG	502	6	-	Arabidopsis thaliana
273	stress	FcGSTU28	MYC	CATTTG	830	6	+	Arabidopsis thaliana
274	stress	FcGSTU28	MYC	CATGTG	1577	6	+	Arabidopsis thaliana
275	stress	FcGSTU28	Myc	TCTCTTA	755	7	-	Arabidopsis thaliana
276	stress	FcGSTU29	MYC	CATTTG	731	6	-	Arabidopsis thaliana
277	stress	FcGSTU29	MYC	CATGTG	1059	6	+	Arabidopsis thaliana
278	stress	FcGSTU29	MYC	CATGTG	1065	6	+	Arabidopsis thaliana
279	stress	FcGSTU29	MYC	CATTTG	1291	6	-	Arabidopsis thaliana
280	stress	FcGSTU29	MYC	CAATTG	1506	6	-	Arabidopsis thaliana
281	stress	FcGSTU29	Myc	TCTCTTA	660	7	-	Arabidopsis thaliana
282	stress	FcGSTU29	Myc	TCTCTTA	1594	7	-	Arabidopsis thaliana
283	stress	FcGSTU30	Myc	TCTCTTA	1140	7	-	Arabidopsis thaliana
284	stress	FcGSTU30	Myc	TCTCTTA	1281	7	-	Arabidopsis thaliana
285	stress	FcGSTU30	Myc	TCTCTTA	1320	7	-	Arabidopsis thaliana
286	stress	FcGSTU30	MYC	CATGTG	31	6	-	Arabidopsis thaliana
287	stress	FcGSTU30	MYC	CAATTG	342	6	+	Arabidopsis thaliana
288	stress	FcGSTU31	MYC	CATGTG	268	6	+	Arabidopsis thaliana
289	stress	FcGSTU31	MYC	CAATTG	508	6	+	Arabidopsis thaliana
290	stress	FcGSTU32	MYC	CATTTG	42	6	+	Arabidopsis thaliana
291	stress	FcGSTU32	MYC	CATTTG	528	6	-	Arabidopsis thaliana
292	stress	FcGSTU32	MYC	CATTTG	855	6	+	Arabidopsis thaliana
293	stress	FcGSTU32	MYC	CAATTG	1544	6	-	Arabidopsis thaliana
294	stress	FcGSTU32	MYC	CATGTG	1582	6	+	Arabidopsis thaliana
295	stress	FcGSTU33	MYC	CATGTG	429	6	+	Arabidopsis thaliana
296	stress	FcGSTU33	MYC	CAATTG	654	6	+	Arabidopsis thaliana
297	stress	FcGSTU33	MYC	CAATTG	903	6	+	Arabidopsis thaliana
298	stress	FcGSTU34	MYC	CAATTG	240	6	+	Arabidopsis thaliana
299	stress	FcGSTU34	MYC	CAATTG	1439	6	-	Arabidopsis thaliana
300	stress	FcGSTU34	MYC	CATTTG	1491	6	-	Arabidopsis thaliana
301	stress	FcGSTU34	MYC	CATTTG	1928	6	+	Arabidopsis thaliana
302	stress	FcGSTU35	MYC	CATTTG	933	6	+	Arabidopsis thaliana
303	stress	FcGSTU10	MYC	CATTTG	711	6	-	Arabidopsis thaliana
304	stress	FcGSTU10	MYC	CATTTG	1435	6	+	Arabidopsis thaliana
305	stress	FcGSTU10	MYC	CATTTG	1866	6	-	Arabidopsis thaliana
306	stress	FcGSTU11	MYC	CATTTG	705	6	-	Arabidopsis thaliana
307	stress	FcGSTU11	MYC	CATTTG	1428	6	-	Arabidopsis thaliana
308	stress	FcGSTU11	MYC	CATTTG	1459	6	-	Arabidopsis thaliana
309	stress	FcGSTU11	MYC	CATTTG	1867	6	-	Arabidopsis thaliana
310	stress	FcGSTU12	MYC	CATTTG	155	6	+	Arabidopsis thaliana
311	stress	FcGSTU12	MYC	CATTTG	1184	6	+	Arabidopsis thaliana
312	stress	FcGSTU12	MYC	CAATTG	1461	6	-	Arabidopsis thaliana
313	stress	FcGSTU12	MYC	CAATTG	1530	6	-	Arabidopsis thaliana
314	stress	FcGSTU13	MYC	CATTTG	755	6	-	Arabidopsis thaliana
315	stress	FcGSTU13	MYC	CATTTG	1013	6	+	Arabidopsis thaliana
316	stress	FcGSTU13	MYC	CATTTG	1207	6	+	Arabidopsis thaliana
317	stress	FcGSTU13	MYC	CATGTG	1547	6	-	Arabidopsis thaliana
318	stress	FcGSTU14	MYC	CATGTG	330	6	+	Arabidopsis thaliana
319	stress	FcGSTU14	MYC	CATTTG	738	6	-	Arabidopsis thaliana
320	stress	FcGSTU14	MYC	CATGTG	1108	6	+	Arabidopsis thaliana
321	stress	FcGSTU14	MYC	CATTTG	1366	6	+	Arabidopsis thaliana
322	stress	FcGSTU14	MYC	CATTTG	1412	6	+	Arabidopsis thaliana
323	stress	FcGSTU14	Myc	TCTCTTA	938	7	-	Arabidopsis thaliana
324	stress	FcGSTU15	MYC	CATTTG	697	6	-	Arabidopsis thaliana
325	stress	FcGSTU16	Myc	TCTCTTA	1576	7	+	Arabidopsis thaliana
326	stress	FcGSTU16	MYC	CATGTG	64	6	+	Arabidopsis thaliana
327	stress	FcGSTU16	MYC	CATGTG	902	6	-	Arabidopsis thaliana
328	stress	FcGSTU16	MYC	CATTTG	1738	6	-	Arabidopsis thaliana
329	stress	FcGSTU17	MYC	CAATTG	142	6	+	Arabidopsis thaliana
330	stress	FcGSTU17	MYC	CATGTG	688	6	+	Arabidopsis thaliana
331	stress	FcGSTU17	MYC	CATGTG	1983	6	+	Arabidopsis thaliana
332	stress	FcGSTU2	MYC	CAATTG	292	6	+	Arabidopsis thaliana
333	stress	FcGSTU2	MYC	CAATTG	317	6	+	Arabidopsis thaliana
334	stress	FcGSTU2	MYC	CATTTG	366	6	+	Arabidopsis thaliana
335	stress	FcGSTU2	MYC	CATTTG	549	6	-	Arabidopsis thaliana
336	stress	FcGSTU2	MYC	CATTTG	1328	6	-	Arabidopsis thaliana
337	stress	FcGSTU2	MYC	CATTTG	1519	6	+	Arabidopsis thaliana
338	stress	FcGSTU2	MYC	CATTTG	1737	6	+	Arabidopsis thaliana
339	stress	FcGSTU2	MYC	CATTTG	1827	6	+	Arabidopsis thaliana
340	stress	FcGSTU2	Myc	TCTCTTA	49	7	-	Arabidopsis thaliana
341	stress	FcGSTU3	Myc	TCTCTTA	1971	7	+	Arabidopsis thaliana
342	stress	FcGSTU4	Myc	TCTCTTA	1967	7	+	Arabidopsis thaliana
343	stress	FcGSTU4	MYC	CATTTG	130	6	+	Arabidopsis thaliana
344	stress	FcGSTU4	MYC	CATTTG	263	6	-	Arabidopsis thaliana
345	stress	FcGSTU4	MYC	CAATTG	360	6	+	Arabidopsis thaliana
346	stress	FcGSTU4	MYC	CATGTG	879	6	-	Arabidopsis thaliana
347	stress	FcGSTU4	MYC	CATGTG	1371	6	+	Arabidopsis thaliana
348	stress	FcGSTU4	MYC	CATTTG	1951	6	-	Arabidopsis thaliana
349	stress	FcGSTU21	Myc	TCTCTTA	175	7	+	Arabidopsis thaliana
350	stress	FcGSTU21	MYC	CATTTG	666	6	-	Arabidopsis thaliana
351	stress	FcGSTU21	MYC	CATTTG	1067	6	-	Arabidopsis thaliana
352	stress	FcGSTU21	MYC	CAATTG	1521	6	-	Arabidopsis thaliana
353	stress	FcGSTU18	MYC	CATTTG	849	6	+	Arabidopsis thaliana
354	stress	FcGSTU18	MYC	CATGTG	1116	6	+	Arabidopsis thaliana
355	stress	FcGSTT1	MYC	CATGTG	193	6	+	Arabidopsis thaliana
356	stress	FcGSTT1	MYC	CATGTG	638	6	-	Arabidopsis thaliana
357	stress	FcGSTT1	MYC	CATGTG	975	6	-	Arabidopsis thaliana
358	stress	FcGSTU1	MYC	CATTTG	306	6	+	Arabidopsis thaliana
359	stress	FcGSTU1	MYC	CATTTG	337	6	+	Arabidopsis thaliana
360	stress	FcGSTU1	Myc	TCTCTTA	215	7	-	Arabidopsis thaliana
361	stress	FcGSTU1	Myc	TCTCTTA	243	7	-	Arabidopsis thaliana
362	stress	FcGSTU1	Myc	TCTCTTA	807	7	+	Arabidopsis thaliana
363	stress	FcGSTU9	Myc	TCTCTTA	710	7	+	Arabidopsis thaliana
364	stress	FcGSTU9	MYC	CATTTG	111	6	+	Arabidopsis thaliana
365	stress	FcGSTU9	MYC	CATTTG	236	6	+	Arabidopsis thaliana
366	stress	FcGSTU9	MYC	CATTTG	267	6	+	Arabidopsis thaliana
367	stress	FcGSTU9	MYC	CATTTG	1459	6	-	Arabidopsis thaliana
368	stress	FcGSTU9	MYC	CATTTG	1697	6	-	Arabidopsis thaliana
369	stress	FcGSTF1	TC-rich repeats	GTTTTCTTAC	325	9	-	Nicotiana tabacum
370	stress	FcGSTF6	TC-rich repeats	GTTTTCTTAC	933	9	-	Nicotiana tabacum
371	stress	FcGSTL1	TC-rich repeats	GTTTTCTTAC	1631	9	+	Nicotiana tabacum
372	stress	FcEF1Bγ1	TC-rich repeats	GTTTTCTTAC	1129	9	-	Nicotiana tabacum
373	stress	FcGSTU39	TC-rich repeats	GTTTTCTTAC	184	9	+	Nicotiana tabacum
374	stress	FcGSTU41	TC-rich repeats	GTTTTCTTAC	1272	9	-	Nicotiana tabacum
375	stress	FcGSTU42	TC-rich repeats	GTTTTCTTAC	1064	9	+	Nicotiana tabacum
376	stress	FcGSTU23	TC-rich repeats	GTTTTCTTAC	1853	9	+	Nicotiana tabacum
377	stress	FcGSTU28	TC-rich repeats	GTTTTCTTAC	1853	9	+	Nicotiana tabacum
378	stress	FcGSTU31	TC-rich repeats	GTTTTCTTAC	675	9	-	Nicotiana tabacum
379	stress	FcGSTU32	TC-rich repeats	GTTTTCTTAC	779	9	-	Nicotiana tabacum
380	stress	FcGSTU32	TC-rich repeats	GTTTTCTTAC	1853	9	+	Nicotiana tabacum
381	stress	FcGSTU34	TC-rich repeats	ATTCTCTAAC	680	9	-	Nicotiana tabacum
382	stress	FcGSTU34	TC-rich repeats	GTTTTCTTAC	764	9	+	Nicotiana tabacum
383	stress	FcGSTU34	TC-rich repeats	GTTTTCTTAC	1116	9	+	Nicotiana tabacum
384	stress	FcGSTU34	TC-rich repeats	GTTTTCTTAC	1716	9	+	Nicotiana tabacum
385	stress	FcGSTU35	TC-rich repeats	ATTCTCTAAC	1825	9	-	Nicotiana tabacum
386	stress	FcGSTU10	TC-rich repeats	ATTCTCTAAC	571	9	+	Nicotiana tabacum
387	stress	FcGSTU10	TC-rich repeats	GTTTTCTTAC	1934	10	-	Nicotiana tabacum
388	stress	FcGSTU11	TC-rich repeats	ATTCTCTAAC	565	9	+	Nicotiana tabacum
389	stress	FcGSTU11	TC-rich repeats	GTTTTCTTAC	1935	9	-	Nicotiana tabacum
390	stress	FcGSTT1	TC-rich repeats	GTTTTCTTAC	492	9	-	Nicotiana tabacum
391	stress	FcGSTU1	TC-rich repeats	GTTTTCTTAC	650	9	+	Nicotiana tabacum
392	stress	FcGSTU9	TC-rich repeats	GTTTTCTTAC	987	9	+	Nicotiana tabacum
393	Hormone	FcGSTU36	ABRE	AACCCGG	1572	7	-	Arabidopsis thaliana
394	Hormone	FcGSTU37	ABRE	ACGTG	580	5	+	Arabidopsis thaliana
395	Hormone	FcGSTU37	ABRE	ACGTG	690	5	+	Arabidopsis thaliana
396	Hormone	FcGSTU37	ABRE	ACGTG	789	5	+	Arabidopsis thaliana
397	Hormone	FcGSTU37	ABRE	ACGTG	831	5	+	Arabidopsis thaliana
398	Hormone	FcGSTU37	ABRE	ACGTG	945	5	+	Arabidopsis thaliana
399	Hormone	FcGSTU37	ABRE	CACGTG	1164	6	-	Arabidopsis thaliana
400	Hormone	FcGSTU37	ABRE	ACGTG	1165	5	+	Arabidopsis thaliana
401	Hormone	FcGSTU37	ABRE	ACGTG	1320	5	-	Arabidopsis thaliana
402	Hormone	FcGSTU8	ABRE	ACGTG	1140	5	-	Arabidopsis thaliana
403	Hormone	FcGSTF1	ABRE	ACGTG	49	5	-	Arabidopsis thaliana
404	Hormone	FcGSTF1	ABRE	CACGTG	59	6	+	Arabidopsis thaliana
405	Hormone	FcGSTF1	ABRE	ACGTG	60	5	+	Arabidopsis thaliana
406	Hormone	FcGSTF1	ABRE	CACGTG	69	6	+	Arabidopsis thaliana
407	Hormone	FcGSTF1	ABRE	ACGTG	70	5	+	Arabidopsis thaliana
408	Hormone	FcGSTF1	ABRE	ACGTG	150	5	+	Arabidopsis thaliana
409	Hormone	FcGSTF1	ABRE	ACGTG	780	5	+	Arabidopsis thaliana
410	Hormone	FcGSTF1	ABRE	ACGTG	1131	5	+	Arabidopsis thaliana
411	Hormone	FcGSTF1	ABRE	ACGTG	1747	5	+	Arabidopsis thaliana
412	Hormone	FcGSTF1	ABRE	CACGTG	1760	6	-	Arabidopsis thaliana
413	Hormone	FcGSTF1	ABRE	ACGTG	1761	5	+	Arabidopsis thaliana
414	Hormone	FcGSTF1	ABRE	CACGTG	1775	6	-	Arabidopsis thaliana
415	Hormone	FcGSTF1	ABRE	ACGTG	1776	5	+	Arabidopsis thaliana
416	Hormone	FcGSTF2	ABRE	ACGTG	1394	5	+	Arabidopsis thaliana
417	Hormone	FcGSTL2	ABRE	CACGTG	1713	6	-	Arabidopsis thaliana
418	Hormone	FcGSTL2	ABRE	ACGTG	1714	5	+	Arabidopsis thaliana
419	Hormone	FcGSTL2	ABRE	CACGTG	1833	6	-	Arabidopsis thaliana
420	Hormone	FcGSTL2	ABRE	ACGTG	1834	5	+	Arabidopsis thaliana
421	Hormone	FcGSTL3	ABRE	ACGTG	873	5	-	Arabidopsis thaliana
422	Hormone	FcGSTL3	ABRE	GCCGCGTGGC	1655	9	+	Oryza sativa
423	Hormone	FcGSTF3	ABRE	ACGTG	1028	5	-	Arabidopsis thaliana
424	Hormone	FcGSTF3	ABRE	ACGTG	1092	5	+	Arabidopsis thaliana
425	Hormone	FcGSTF3	ABRE	CACGTG	1113	6	-	Arabidopsis thaliana
426	Hormone	FcGSTF3	ABRE	ACGTG	1114	5	+	Arabidopsis thaliana
427	Hormone	FcGSTF3	ABRE	CACGTG	1135	6	-	Arabidopsis thaliana
428	Hormone	FcGSTF3	ABRE	ACGTG	1136	5	+	Arabidopsis thaliana
429	Hormone	FcGSTF3	ABRE	ACGTG	1760	5	-	Arabidopsis thaliana
430	Hormone	FcGSTF4	ABRE	ACGTG	936	5	+	Arabidopsis thaliana
431	Hormone	FcGSTF4	ABRE	CACGTG	957	6	+	Arabidopsis thaliana
432	Hormone	FcGSTF4	ABRE	ACGTG	958	5	+	Arabidopsis thaliana
433	Hormone	FcGSTF4	ABRE	ACGTG	1731	5	+	Arabidopsis thaliana
434	Hormone	FcGSTF4	ABRE	ACGTG	1759	5	-	Arabidopsis thaliana
435	Hormone	FcGSTF5	ABRE	ACGTG	1377	5	+	Arabidopsis thaliana
436	Hormone	FcGSTF6	ABRE	CGCACGTGTC	311	9	+	Hordeum vulgare
437	Hormone	FcGSTF6	ABRE	CACGTG	313	6	+	Arabidopsis thaliana
438	Hormone	FcGSTF6	ABRE	ACGTG	314	5	+	Arabidopsis thaliana
439	Hormone	FcGSTF6	ABRE	GACACGTGGC	615	9	-	Triticum aestivum
440	Hormone	FcGSTF6	ABRE	CACGTG	617	6	+	Arabidopsis thaliana
441	Hormone	FcGSTF6	ABRE	ACGTG	618	5	+	Arabidopsis thaliana
442	Hormone	FcGSTF6	ABRE	ACGTG	1644	5	-	Arabidopsis thaliana
443	Hormone	FcGSTU19	ABRE	CGCACGTGTC	568	9	+	Hordeum vulgare
444	Hormone	FcGSTU19	ABRE	ACGTG	571	5	+	Arabidopsis thaliana
445	Hormone	FcGSTU19	ABRE	ACGTG	958	5	+	Arabidopsis thaliana
446	Hormone	FcGSTU20	ABRE	ACGTG	662	5	+	Arabidopsis thaliana
447	Hormone	FcGSTU20	ABRE	ACGTG	1546	5	-	Arabidopsis thaliana
448	Hormone	FcGSTL1	ABRE	ACGTG	308	5	-	Arabidopsis thaliana
449	Hormone	FcGSTL1	ABRE	ACGTG	1336	5	-	Arabidopsis thaliana
450	Hormone	FcEF1Bγ1	ABRE	ACGTG	145	5	+	Arabidopsis thaliana
451	Hormone	FcGSTU38	ABRE	ACGTG	631	5	-	Arabidopsis thaliana
452	Hormone	FcGSTU38	ABRE	AACCCGG	692	7	-	Arabidopsis thaliana
453	Hormone	FcGSTU38	ABRE	ACGTG	1007	5	+	Arabidopsis thaliana
454	Hormone	FcGSTU38	ABRE	ACGTG	1671	5	-	Arabidopsis thaliana
455	Hormone	FcGSTU39	ABRE	ACGTG	96	5	-	Arabidopsis thaliana
456	Hormone	FcGSTU40	ABRE	ACGTG	562	5	+	Arabidopsis thaliana
457	Hormone	FcGSTU40	ABRE	ACGTG	1676	5	-	Arabidopsis thaliana
458	Hormone	FcGSTU42	ABRE	ACGTG	302	5	-	Arabidopsis thaliana
459	Hormone	FcGSTU42	ABRE	ACGTG	556	5	-	Arabidopsis thaliana
460	Hormone	FcGSTU5	ABRE	ACGTG	1786	5	-	Arabidopsis thaliana
461	Hormone	FcGSTU6	ABRE	ACGTG	1795	5	-	Arabidopsis thaliana
462	Hormone	FcGSTU7	ABRE	ACGTG	1770	5	-	Arabidopsis thaliana
463	Hormone	FcGSTU22	ABRE	ACGTG	1193	5	-	Arabidopsis thaliana
464	Hormone	FcGSTU22	ABRE	ACGTG	1247	5	+	Arabidopsis thaliana
465	Hormone	FcGSTU23	ABRE	CACGTG	1772	6	-	Arabidopsis thaliana
466	Hormone	FcGSTU23	ABRE	ACGTG	1773	5	+	Arabidopsis thaliana
467	Hormone	FcGSTU24	ABRE	ACGTG	1554	5	-	Arabidopsis thaliana
468	Hormone	FcGSTU27	ABRE	ACGTG	1418	5	+	Arabidopsis thaliana
469	Hormone	FcGSTU28	ABRE	CACGTG	1772	6	-	Arabidopsis thaliana
470	Hormone	FcGSTU28	ABRE	ACGTG	1773	5	+	Arabidopsis thaliana
471	Hormone	FcGSTU29	ABRE	ACGTG	557	5	+	Arabidopsis thaliana
472	Hormone	FcGSTU29	ABRE	ACGTG	1072	5	+	Arabidopsis thaliana
473	Hormone	FcGSTU31	ABRE	ACGTG	263	5	+	Arabidopsis thaliana
474	Hormone	FcGSTU31	ABRE	ACGTG	275	5	+	Arabidopsis thaliana
475	Hormone	FcGSTU32	ABRE	CACGTG	1772	6	-	Arabidopsis thaliana
476	Hormone	FcGSTU32	ABRE	ACGTG	1773	5	+	Arabidopsis thaliana
477	Hormone	FcGSTU33	ABRE	ACGTG	90	5	-	Arabidopsis thaliana
478	Hormone	FcGSTU33	ABRE	ACGTG	214	5	+	Arabidopsis thaliana
479	Hormone	FcGSTU33	ABRE	ACGTG	424	5	+	Arabidopsis thaliana
480	Hormone	FcGSTU33	ABRE	ACGTG	436	5	+	Arabidopsis thaliana
481	Hormone	FcGSTU34	ABRE	ACGTG	322	5	+	Arabidopsis thaliana
482	Hormone	FcGSTU34	ABRE	ACGTG	1670	5	-	Arabidopsis thaliana
483	Hormone	FcGSTU10	ABRE	TACGGTC	607	7	+	Arabidopsis thaliana
484	Hormone	FcGSTU10	ABRE	ACGTG	1360	5	-	Arabidopsis thaliana
485	Hormone	FcGSTU11	ABRE	TACGGTC	601	7	+	Arabidopsis thaliana
486	Hormone	FcGSTU11	ABRE	ACGTG	1353	5	-	Arabidopsis thaliana
487	Hormone	FcGSTU12	ABRE	ACGTG	100	5	-	Arabidopsis thaliana
488	Hormone	FcGSTU16	ABRE	CACGTG	1297	6	-	Arabidopsis thaliana
489	Hormone	FcGSTU16	ABRE	ACGTG	1298	5	+	Arabidopsis thaliana
490	Hormone	FcGSTU16	ABRE	ACGTG	1432	5	+	Arabidopsis thaliana
491	Hormone	FcGSTU17	ABRE	ACGTG	810	5	-	Arabidopsis thaliana
492	Hormone	FcGSTU17	ABRE	CGTACGTGCA	818	9	-	Hordeum vulgare
493	Hormone	FcGSTU17	ABRE	ACGTG	820	5	-	Arabidopsis thaliana
494	Hormone	FcGSTU17	ABRE	ACGTG	1771	5	-	Arabidopsis thaliana
495	Hormone	FcGSTU17	ABRE	ACGTG	1864	5	+	Arabidopsis thaliana
496	Hormone	FcGSTU17	ABRE	CACGTG	1919	6	-	Arabidopsis thaliana
497	Hormone	FcGSTU17	ABRE	ACGTG	1920	5	+	Arabidopsis thaliana
498	Hormone	FcGSTU17	ABRE	ACGTG	1928	5	+	Arabidopsis thaliana
499	Hormone	FcGSTU2	ABRE	AACCCGG	565	7	-	Arabidopsis thaliana
500	Hormone	FcGSTU2	ABRE	ACGTG	1422	5	-	Arabidopsis thaliana
501	Hormone	FcGSTU2	ABRE	CACGTG	1504	6	-	Arabidopsis thaliana
502	Hormone	FcGSTU2	ABRE	ACGTG	1505	5	+	Arabidopsis thaliana
503	Hormone	FcGSTU2	ABRE	ACGTG	1654	5	-	Arabidopsis thaliana
504	Hormone	FcGSTU2	ABRE	CACGTG	1722	6	-	Arabidopsis thaliana
505	Hormone	FcGSTU2	ABRE	ACGTG	1723	5	+	Arabidopsis thaliana
506	Hormone	FcGSTU3	ABRE	AACCCGG	211	7	-	Arabidopsis thaliana
507	Hormone	FcGSTU3	ABRE	CACGTG	1115	6	-	Arabidopsis thaliana
508	Hormone	FcGSTU3	ABRE	ACGTG	1116	5	+	Arabidopsis thaliana
509	Hormone	FcGSTU3	ABRE	ACGTG	1403	5	+	Arabidopsis thaliana
510	Hormone	FcGSTU4	ABRE	ACGTG	1578	5	+	Arabidopsis thaliana
511	Hormone	FcGSTU21	ABRE	ACGTG	688	5	+	Arabidopsis thaliana
512	Hormone	FcGSTU21	ABRE	ACGTG	1388	5	-	Arabidopsis thaliana
513	Hormone	FcGSTU18	ABRE	ACGTG	1530	5	-	Arabidopsis thaliana
514	Hormone	FcGSTT1	ABRE	ACGTG	700	5	-	Arabidopsis thaliana
515	Hormone	FcGSTF3	AuxRR-core	GGTCCAT	393	7	+	Nicotiana tabacum
516	Hormone	FcGSTF5	AuxRR-core	GGTCCAT	668	7	+	Nicotiana tabacum
517	Hormone	FcGSTU19	AuxRR-core	GGTCCAT	1944	7	+	Nicotiana tabacum
518	Hormone	FcGSTU26	AuxRR-core	GGTCCAT	1184	7	-	Nicotiana tabacum
519	Hormone	FcGSTU28	AuxRR-core	GGTCCAT	1313	7	+	Nicotiana tabacum
520	Hormone	FcGSTU32	AuxRR-core	GGTCCAT	1344	7	+	Nicotiana tabacum
521	Hormone	FcGSTU21	AuxRR-core	GGTCCAT	1070	7	-	Nicotiana tabacum
522	Hormone	FcGSTT1	AuxRR-core	GGTCCAT	1249	7	-	Nicotiana tabacum
523	Hormone	FcGSTU37	CGTCA-motif	CGTCA	651	5	+	Hordeum vulgare
524	Hormone	FcGSTU37	CGTCA-motif	CGTCA	943	5	-	Hordeum vulgare
525	Hormone	FcGSTU37	CGTCA-motif	CGTCA	967	5	-	Hordeum vulgare
526	Hormone	FcGSTU8	CGTCA-motif	CGTCA	1540	5	-	Hordeum vulgare
527	Hormone	FcGSTF1	CGTCA-motif	CGTCA	56	5	+	Hordeum vulgare
528	Hormone	FcGSTF1	CGTCA-motif	CGTCA	63	5	-	Hordeum vulgare
529	Hormone	FcGSTF1	CGTCA-motif	CGTCA	962	5	-	Hordeum vulgare
530	Hormone	FcGSTF1	CGTCA-motif	CGTCA	1252	5	+	Hordeum vulgare
531	Hormone	FcGSTF2	CGTCA-motif	CGTCA	1009	5	+	Hordeum vulgare
532	Hormone	FcGSTF2	CGTCA-motif	CGTCA	1784	5	-	Hordeum vulgare
533	Hormone	FcGSTL2	CGTCA-motif	CGTCA	1154	5	+	Hordeum vulgare
534	Hormone	FcGSTL2	CGTCA-motif	CGTCA	1486	5	-	Hordeum vulgare
535	Hormone	FcGSTL2	CGTCA-motif	CGTCA	1733	5	+	Hordeum vulgare
536	Hormone	FcGSTL3	CGTCA-motif	CGTCA	802	5	+	Hordeum vulgare
537	Hormone	FcGSTF3	CGTCA-motif	CGTCA	1095	5	-	Hordeum vulgare
538	Hormone	FcGSTF4	CGTCA-motif	CGTCA	939	5	-	Hordeum vulgare
539	Hormone	FcGSTF6	CGTCA-motif	CGTCA	44	5	-	Hordeum vulgare
540	Hormone	FcGSTF6	CGTCA-motif	CGTCA	1284	5	+	Hordeum vulgare
541	Hormone	FcGSTU19	CGTCA-motif	CGTCA	163	5	-	Hordeum vulgare
542	Hormone	FcGSTU19	CGTCA-motif	CGTCA	435	5	-	Hordeum vulgare
543	Hormone	FcGSTU20	CGTCA-motif	CGTCA	969	5	+	Hordeum vulgare
544	Hormone	FcGSTU20	CGTCA-motif	CGTCA	1697	5	-	Hordeum vulgare
545	Hormone	FcGSTL1	CGTCA-motif	CGTCA	974	5	-	Hordeum vulgare
546	Hormone	FcGSTL1	CGTCA-motif	CGTCA	1398	5	+	Hordeum vulgare
547	Hormone	FcGSTL1	CGTCA-motif	CGTCA	1754	5	+	Hordeum vulgare
548	Hormone	FcEF1Bγ1	CGTCA-motif	CGTCA	295	5	+	Hordeum vulgare
549	Hormone	FcEF1Bγ1	CGTCA-motif	CGTCA	949	5	-	Hordeum vulgare
550	Hormone	FcGSTU38	CGTCA-motif	CGTCA	633	5	+	Hordeum vulgare
551	Hormone	FcGSTU41	CGTCA-motif	CGTCA	458	5	-	Hordeum vulgare
552	Hormone	FcGSTU5	CGTCA-motif	CGTCA	1773	5	-	Hordeum vulgare
553	Hormone	FcGSTU6	CGTCA-motif	CGTCA	1427	5	-	Hordeum vulgare
554	Hormone	FcGSTU6	CGTCA-motif	CGTCA	1619	5	-	Hordeum vulgare
555	Hormone	FcGSTU6	CGTCA-motif	CGTCA	1782	5	-	Hordeum vulgare
556	Hormone	FcGSTU7	CGTCA-motif	CGTCA	1857	5	-	Hordeum vulgare
557	Hormone	FcGSTU22	CGTCA-motif	CGTCA	54	5	+	Hordeum vulgare
558	Hormone	FcGSTU22	CGTCA-motif	CGTCA	971	5	-	Hordeum vulgare
559	Hormone	FcGSTU24	CGTCA-motif	CGTCA	1689	5	-	Hordeum vulgare
560	Hormone	FcGSTU25	CGTCA-motif	CGTCA	54	5	+	Hordeum vulgare
561	Hormone	FcGSTU25	CGTCA-motif	CGTCA	960	5	-	Hordeum vulgare
562	Hormone	FcGSTU26	CGTCA-motif	CGTCA	1131	5	+	Hordeum vulgare
563	Hormone	FcGSTU27	CGTCA-motif	CGTCA	1199	5	+	Hordeum vulgare
564	Hormone	FcGSTU27	CGTCA-motif	CGTCA	1979	5	+	Hordeum vulgare
565	Hormone	FcGSTU28	CGTCA-motif	CGTCA	531	5	-	Hordeum vulgare
566	Hormone	FcGSTU28	CGTCA-motif	CGTCA	799	5	+	Hordeum vulgare
567	Hormone	FcGSTU29	CGTCA-motif	CGTCA	555	5	-	Hordeum vulgare
568	Hormone	FcGSTU29	CGTCA-motif	CGTCA	846	5	+	Hordeum vulgare
569	Hormone	FcGSTU29	CGTCA-motif	CGTCA	1402	5	-	Hordeum vulgare
570	Hormone	FcGSTU30	CGTCA-motif	CGTCA	1948	5	+	Hordeum vulgare
571	Hormone	FcGSTU32	CGTCA-motif	CGTCA	557	5	-	Hordeum vulgare
572	Hormone	FcGSTU32	CGTCA-motif	CGTCA	824	5	+	Hordeum vulgare
573	Hormone	FcGSTU33	CGTCA-motif	CGTCA	705	5	-	Hordeum vulgare
574	Hormone	FcGSTU33	CGTCA-motif	CGTCA	1742	5	+	Hordeum vulgare
575	Hormone	FcGSTU34	CGTCA-motif	CGTCA	755	5	-	Hordeum vulgare
576	Hormone	FcGSTU35	CGTCA-motif	CGTCA	1597	5	+	Hordeum vulgare
577	Hormone	FcGSTU10	CGTCA-motif	CGTCA	310	5	-	Hordeum vulgare
578	Hormone	FcGSTU11	CGTCA-motif	CGTCA	1340	5	-	Hordeum vulgare
579	Hormone	FcGSTU11	CGTCA-motif	CGTCA	1652	5	+	Hordeum vulgare
580	Hormone	FcGSTU13	CGTCA-motif	CGTCA	1008	5	-	Hordeum vulgare
581	Hormone	FcGSTU13	CGTCA-motif	CGTCA	1141	5	+	Hordeum vulgare
582	Hormone	FcGSTU15	CGTCA-motif	CGTCA	529	5	-	Hordeum vulgare
583	Hormone	FcGSTU16	CGTCA-motif	CGTCA	363	5	-	Hordeum vulgare
584	Hormone	FcGSTU16	CGTCA-motif	CGTCA	1516	5	-	Hordeum vulgare
585	Hormone	FcGSTU16	CGTCA-motif	CGTCA	1742	5	-	Hordeum vulgare
586	Hormone	FcGSTU16	CGTCA-motif	CGTCA	1799	5	-	Hordeum vulgare
587	Hormone	FcGSTU17	CGTCA-motif	CGTCA	1199	5	+	Hordeum vulgare
588	Hormone	FcGSTU3	CGTCA-motif	CGTCA	181	5	-	Hordeum vulgare
589	Hormone	FcGSTU3	CGTCA-motif	CGTCA	514	5	-	Hordeum vulgare
590	Hormone	FcGSTU3	CGTCA-motif	CGTCA	622	5	-	Hordeum vulgare
591	Hormone	FcGSTU3	CGTCA-motif	CGTCA	625	5	+	Hordeum vulgare
592	Hormone	FcGSTU3	CGTCA-motif	CGTCA	1274	5	+	Hordeum vulgare
593	Hormone	FcGSTU3	CGTCA-motif	CGTCA	1730	5	+	Hordeum vulgare
594	Hormone	FcGSTU4	CGTCA-motif	CGTCA	184	5	+	Hordeum vulgare
595	Hormone	FcGSTU21	CGTCA-motif	CGTCA	686	5	-	Hordeum vulgare
596	Hormone	FcGSTU18	CGTCA-motif	CGTCA	702	5	+	Hordeum vulgare
597	Hormone	FcGSTT1	CGTCA-motif	CGTCA	702	5	+	Hordeum vulgare
598	Hormone	FcGSTT1	CGTCA-motif	CGTCA	1427	5	+	Hordeum vulgare
599	Hormone	FcGSTU1	CGTCA-motif	CGTCA	1436	5	+	Hordeum vulgare
600	Hormone	FcGSTF4	GARE-motif	TCTGTTG	1529	7	+	Brassica oleracea
601	Hormone	FcGSTU5	GARE-motif	TCTGTTG	202	7	-	Brassica oleracea
602	Hormone	FcGSTU5	GARE-motif	TCTGTTG	1890	7	+	Brassica oleracea
603	Hormone	FcGSTU6	GARE-motif	TCTGTTG	129	7	-	Brassica oleracea
604	Hormone	FcGSTU6	GARE-motif	TCTGTTG	1899	7	+	Brassica oleracea
605	Hormone	FcGSTU27	GARE-motif	TCTGTTG	894	7	-	Brassica oleracea
606	Hormone	FcGSTU27	GARE-motif	TCTGTTG	949	7	-	Brassica oleracea
607	Hormone	FcGSTU28	GARE-motif	TCTGTTG	938	7	+	Brassica oleracea
608	Hormone	FcGSTU31	GARE-motif	TCTGTTG	462	7	-	Brassica oleracea
609	Hormone	FcGSTU32	GARE-motif	TCTGTTG	963	7	+	Brassica oleracea
610	Hormone	FcGSTU10	GARE-motif	TCTGTTG	1668	7	-	Brassica oleracea
611	Hormone	FcGSTU11	GARE-motif	TCTGTTG	1660	7	-	Brassica oleracea
612	Hormone	FcGSTU15	GARE-motif	TCTGTTG	1836	7	-	Brassica oleracea
613	Hormone	FcGSTU17	GARE-motif	TCTGTTG	531	7	-	Brassica oleracea
614	Hormone	FcGSTU3	GARE-motif	TCTGTTG	103	7	-	Brassica oleracea
615	Hormone	FcGSTU36	P-box	CCTTTTG	190	7	+	Oryza sativa
616	Hormone	FcGSTU36	P-box	CCTTTTG	440	7	+	Oryza sativa
617	Hormone	FcGSTU36	P-box	CCTTTTG	1673	7	-	Oryza sativa
618	Hormone	FcGSTF2	P-box	CCTTTTG	284	7	+	Oryza sativa
619	Hormone	FcGSTF2	P-box	CCTTTTG	940	7	+	Oryza sativa
620	Hormone	FcGSTL2	P-box	CCTTTTG	1088	7	-	Oryza sativa
621	Hormone	FcGSTU19	P-box	CCTTTTG	713	7	+	Oryza sativa
622	Hormone	FcGSTU19	P-box	CCTTTTG	1500	7	+	Oryza sativa
623	Hormone	FcGSTU20	P-box	CCTTTTG	286	7	+	Oryza sativa
624	Hormone	FcGSTU38	P-box	CCTTTTG	640	7	-	Oryza sativa
625	Hormone	FcGSTU42	P-box	CCTTTTG	417	7	+	Oryza sativa
626	Hormone	FcGSTU42	P-box	CCTTTTG	855	7	+	Oryza sativa
627	Hormone	FcGSTU22	P-box	CCTTTTG	293	7	+	Oryza sativa
628	Hormone	FcGSTU23	P-box	CCTTTTG	1256	7	+	Oryza sativa
629	Hormone	FcGSTU25	P-box	CCTTTTG	1672	7	-	Oryza sativa
630	Hormone	FcGSTU26	P-box	CCTTTTG	1228	7	-	Oryza sativa
631	Hormone	FcGSTU28	P-box	CCTTTTG	1405	7	-	Oryza sativa
632	Hormone	FcGSTU29	P-box	CCTTTTG	706	7	-	Oryza sativa
633	Hormone	FcGSTU30	P-box	CCTTTTG	1222	7	-	Oryza sativa
634	Hormone	FcGSTU32	P-box	CCTTTTG	1435	7	-	Oryza sativa
635	Hormone	FcGSTU33	P-box	CCTTTTG	64	7	-	Oryza sativa
636	Hormone	FcGSTU34	P-box	CCTTTTG	545	7	+	Oryza sativa
637	Hormone	FcGSTU34	P-box	CCTTTTG	1321	7	-	Oryza sativa
638	Hormone	FcGSTU35	P-box	CCTTTTG	1668	7	-	Oryza sativa
639	Hormone	FcGSTU12	P-box	CCTTTTG	1003	7	-	Oryza sativa
640	Hormone	FcGSTU15	P-box	CCTTTTG	708	7	+	Oryza sativa
641	Hormone	FcGSTU17	P-box	CCTTTTG	302	7	+	Oryza sativa
642	Hormone	FcGSTU17	P-box	CCTTTTG	672	7	-	Oryza sativa
643	Hormone	FcGSTU4	P-box	CCTTTTG	2004	7	-	Oryza sativa
644	Hormone	FcGSTU21	P-box	CCTTTTG	1163	7	+	Oryza sativa
645	Hormone	FcGSTU18	P-box	CCTTTTG	1733	7	+	Oryza sativa
646	Hormone	FcGSTF1	TATC-box	TATCCCA	942	7	+	Oryza sativa
647	Hormone	FcEF1Bγ1	TATC-box	TATCCCA	601	7	+	Oryza sativa
648	Hormone	FcGSTU38	TATC-box	TATCCCA	1548	7	+	Oryza sativa
649	Hormone	FcGSTU39	TATC-box	TATCCCA	225	7	-	Oryza sativa
650	Hormone	FcGSTU40	TATC-box	TATCCCA	1563	7	+	Oryza sativa
651	Hormone	FcGSTU23	TATC-box	TATCCCA	1053	7	+	Oryza sativa
652	Hormone	FcGSTU3	TATC-box	TATCCCA	643	7	+	Oryza sativa
653	Hormone	FcGSTU4	TATC-box	TATCCCA	1097	7	+	Oryza sativa
654	Hormone	FcGSTU36	TCA-element	CCATCTTTTT	1031	9	-	Nicotiana tabacum
655	Hormone	FcGSTU37	TCA-element	TCAGAAGAGG	76	9	-	Brassica oleracea
656	Hormone	FcGSTU37	TCA-element	CCATCTTTTT	769	9	-	Nicotiana tabacum
657	Hormone	FcGSTU8	TCA-element	CCATCTTTTT	851	9	-	Nicotiana tabacum
658	Hormone	FcGSTU8	TCA-element	CCATCTTTTT	1267	9	-	Nicotiana tabacum
659	Hormone	FcGSTU8	TCA-element	CCATCTTTTT	1496	9	-	Nicotiana tabacum
660	Hormone	FcGSTF1	TCA-element	TCAGAAGAGG	1402	9	+	Brassica oleracea
661	Hormone	FcGSTF2	TCA-element	CCATCTTTTT	1741	9	+	Nicotiana tabacum
662	Hormone	FcGSTF3	TCA-element	TCAGAAGAGG	1383	9	+	Brassica oleracea
663	Hormone	FcGSTF4	TCA-element	TCAGAAGAGG	1378	9	+	Brassica oleracea
664	Hormone	FcGSTF5	TCA-element	TCAGAAGAGG	1667	9	+	Brassica oleracea
665	Hormone	FcGSTF6	TCA-element	CCATCTTTTT	441	9	+	Nicotiana tabacum
666	Hormone	FcGSTF6	TCA-element	CCATCTTTTT	1969	9	+	Nicotiana tabacum
667	Hormone	FcGSTU20	TCA-element	CCATCTTTTT	1729	9	-	Nicotiana tabacum
668	Hormone	FcGSTU20	TCA-element	CCATCTTTTT	1911	9	-	Nicotiana tabacum
669	Hormone	FcGSTL1	TCA-element	CCATCTTTTT	200	9	-	Nicotiana tabacum
670	Hormone	FcGSTU39	TCA-element	CCATCTTTTT	124	9	-	Nicotiana tabacum
671	Hormone	FcGSTU41	TCA-element	TCAGAAGAGG	110	9	-	Brassica oleracea
672	Hormone	FcGSTU42	TCA-element	CCATCTTTTT	750	9	+	Nicotiana tabacum
673	Hormone	FcGSTU42	TCA-element	CCATCTTTTT	1825	10	+	Nicotiana tabacum
674	Hormone	FcGSTU22	TCA-element	CCATCTTTTT	1765	9	+	Nicotiana tabacum
675	Hormone	FcGSTU23	TCA-element	CCATCTTTTT	821	9	+	Nicotiana tabacum
676	Hormone	FcGSTU25	TCA-element	CCATCTTTTT	1738	9	+	Nicotiana tabacum
677	Hormone	FcGSTU34	TCA-element	CCATCTTTTT	1141	9	-	Nicotiana tabacum
678	Hormone	FcGSTU34	TCA-element	CCATCTTTTT	1349	9	-	Nicotiana tabacum
679	Hormone	FcGSTU12	TCA-element	CCATCTTTTT	463	9	-	Nicotiana tabacum
680	Hormone	FcGSTU21	TCA-element	CCATCTTTTT	238	9	+	Nicotiana tabacum
681	Hormone	FcGSTU21	TCA-element	CCATCTTTTT	362	9	+	Nicotiana tabacum
682	Hormone	FcGSTU37	TGACG-motif	TGACG	651	5	-	Hordeum vulgare
683	Hormone	FcGSTU37	TGACG-motif	TGACG	943	5	+	Hordeum vulgare
684	Hormone	FcGSTU37	TGACG-motif	TGACG	967	5	+	Hordeum vulgare
685	Hormone	FcGSTU8	TGACG-motif	TGACG	1540	5	+	Hordeum vulgare
686	Hormone	FcGSTF1	TGACG-motif	TGACG	56	5	-	Hordeum vulgare
687	Hormone	FcGSTF1	TGACG-motif	TGACG	63	5	+	Hordeum vulgare
688	Hormone	FcGSTF1	TGACG-motif	TGACG	962	5	+	Hordeum vulgare
689	Hormone	FcGSTF1	TGACG-motif	TGACG	1252	5	-	Hordeum vulgare
690	Hormone	FcGSTF2	TGACG-motif	TGACG	1009	5	-	Hordeum vulgare
691	Hormone	FcGSTF2	TGACG-motif	TGACG	1784	5	+	Hordeum vulgare
692	Hormone	FcGSTL2	TGACG-motif	TGACG	1154	5	-	Hordeum vulgare
693	Hormone	FcGSTL2	TGACG-motif	TGACG	1486	5	+	Hordeum vulgare
694	Hormone	FcGSTL2	TGACG-motif	TGACG	1733	5	-	Hordeum vulgare
695	Hormone	FcGSTL3	TGACG-motif	TGACG	802	5	-	Hordeum vulgare
696	Hormone	FcGSTF3	TGACG-motif	TGACG	1095	5	+	Hordeum vulgare
697	Hormone	FcGSTF4	TGACG-motif	TGACG	939	5	+	Hordeum vulgare
698	Hormone	FcGSTF6	TGACG-motif	TGACG	44	5	+	Hordeum vulgare
699	Hormone	FcGSTF6	TGACG-motif	TGACG	1284	5	-	Hordeum vulgare
700	Hormone	FcGSTU19	TGACG-motif	TGACG	163	5	+	Hordeum vulgare
701	Hormone	FcGSTU19	TGACG-motif	TGACG	435	5	+	Hordeum vulgare
702	Hormone	FcGSTU20	TGACG-motif	TGACG	969	5	-	Hordeum vulgare
703	Hormone	FcGSTU20	TGACG-motif	TGACG	1697	5	+	Hordeum vulgare
704	Hormone	FcGSTL1	TGACG-motif	TGACG	974	5	+	Hordeum vulgare
705	Hormone	FcGSTL1	TGACG-motif	TGACG	1398	5	-	Hordeum vulgare
706	Hormone	FcGSTL1	TGACG-motif	TGACG	1754	5	-	Hordeum vulgare
707	Hormone	FcEF1Bγ1	TGACG-motif	TGACG	295	5	-	Hordeum vulgare
708	Hormone	FcEF1Bγ1	TGACG-motif	TGACG	949	5	+	Hordeum vulgare
709	Hormone	FcGSTU38	TGACG-motif	TGACG	633	5	-	Hordeum vulgare
710	Hormone	FcGSTU41	TGACG-motif	TGACG	458	5	+	Hordeum vulgare
711	Hormone	FcGSTU5	TGACG-motif	TGACG	1773	5	+	Hordeum vulgare
712	Hormone	FcGSTU6	TGACG-motif	TGACG	1427	5	+	Hordeum vulgare
713	Hormone	FcGSTU6	TGACG-motif	TGACG	1619	5	+	Hordeum vulgare
714	Hormone	FcGSTU6	TGACG-motif	TGACG	1782	5	+	Hordeum vulgare
715	Hormone	FcGSTU7	TGACG-motif	TGACG	1857	5	+	Hordeum vulgare
716	Hormone	FcGSTU22	TGACG-motif	TGACG	54	5	-	Hordeum vulgare
717	Hormone	FcGSTU22	TGACG-motif	TGACG	971	5	+	Hordeum vulgare
718	Hormone	FcGSTU24	TGACG-motif	TGACG	1689	5	+	Hordeum vulgare
719	Hormone	FcGSTU25	TGACG-motif	TGACG	54	5	-	Hordeum vulgare
720	Hormone	FcGSTU25	TGACG-motif	TGACG	960	5	+	Hordeum vulgare
721	Hormone	FcGSTU26	TGACG-motif	TGACG	1131	5	-	Hordeum vulgare
722	Hormone	FcGSTU27	TGACG-motif	TGACG	1199	5	-	Hordeum vulgare
723	Hormone	FcGSTU27	TGACG-motif	TGACG	1979	5	-	Hordeum vulgare
724	Hormone	FcGSTU28	TGACG-motif	TGACG	531	5	+	Hordeum vulgare
725	Hormone	FcGSTU28	TGACG-motif	TGACG	799	5	-	Hordeum vulgare
726	Hormone	FcGSTU29	TGACG-motif	TGACG	555	5	+	Hordeum vulgare
727	Hormone	FcGSTU29	TGACG-motif	TGACG	846	5	-	Hordeum vulgare
728	Hormone	FcGSTU29	TGACG-motif	TGACG	1402	5	+	Hordeum vulgare
729	Hormone	FcGSTU30	TGACG-motif	TGACG	1948	5	-	Hordeum vulgare
730	Hormone	FcGSTU32	TGACG-motif	TGACG	557	5	+	Hordeum vulgare
731	Hormone	FcGSTU32	TGACG-motif	TGACG	824	5	-	Hordeum vulgare
732	Hormone	FcGSTU33	TGACG-motif	TGACG	705	5	+	Hordeum vulgare
733	Hormone	FcGSTU33	TGACG-motif	TGACG	1742	5	-	Hordeum vulgare
734	Hormone	FcGSTU34	TGACG-motif	TGACG	755	5	+	Hordeum vulgare
735	Hormone	FcGSTU35	TGACG-motif	TGACG	1597	5	-	Hordeum vulgare
736	Hormone	FcGSTU10	TGACG-motif	TGACG	310	5	+	Hordeum vulgare
737	Hormone	FcGSTU11	TGACG-motif	TGACG	1340	5	+	Hordeum vulgare
738	Hormone	FcGSTU11	TGACG-motif	TGACG	1652	5	-	Hordeum vulgare
739	Hormone	FcGSTU13	TGACG-motif	TGACG	1008	5	+	Hordeum vulgare
740	Hormone	FcGSTU13	TGACG-motif	TGACG	1141	5	-	Hordeum vulgare
741	Hormone	FcGSTU15	TGACG-motif	TGACG	529	5	+	Hordeum vulgare
742	Hormone	FcGSTU16	TGACG-motif	TGACG	363	5	+	Hordeum vulgare
743	Hormone	FcGSTU16	TGACG-motif	TGACG	1516	5	+	Hordeum vulgare
744	Hormone	FcGSTU16	TGACG-motif	TGACG	1742	5	+	Hordeum vulgare
745	Hormone	FcGSTU16	TGACG-motif	TGACG	1799	5	+	Hordeum vulgare
746	Hormone	FcGSTU17	TGACG-motif	TGACG	1199	5	-	Hordeum vulgare
747	Hormone	FcGSTU3	TGACG-motif	TGACG	181	5	+	Hordeum vulgare
748	Hormone	FcGSTU3	TGACG-motif	TGACG	514	5	+	Hordeum vulgare
749	Hormone	FcGSTU3	TGACG-motif	TGACG	622	5	+	Hordeum vulgare
750	Hormone	FcGSTU3	TGACG-motif	TGACG	625	5	-	Hordeum vulgare
751	Hormone	FcGSTU3	TGACG-motif	TGACG	1274	5	-	Hordeum vulgare
752	Hormone	FcGSTU3	TGACG-motif	TGACG	1730	5	-	Hordeum vulgare
753	Hormone	FcGSTU4	TGACG-motif	TGACG	184	5	-	Hordeum vulgare
754	Hormone	FcGSTU21	TGACG-motif	TGACG	686	5	+	Hordeum vulgare
755	Hormone	FcGSTU18	TGACG-motif	TGACG	702	5	-	Hordeum vulgare
756	Hormone	FcGSTT1	TGACG-motif	TGACG	702	5	-	Hordeum vulgare
757	Hormone	FcGSTT1	TGACG-motif	TGACG	1427	5	-	Hordeum vulgare
758	Hormone	FcGSTU1	TGACG-motif	TGACG	1436	5	-	Hordeum vulgare
759	Hormone	FcGSTU37	TGA-element	AACGAC	610	6	+	Brassica oleracea
760	Hormone	FcGSTU37	TGA-element	AACGAC	618	6	-	Brassica oleracea
761	Hormone	FcGSTU37	TGA-element	AACGAC	746	6	-	Brassica oleracea
762	Hormone	FcGSTU37	TGA-element	AACGAC	904	6	+	Brassica oleracea
763	Hormone	FcGSTU37	TGA-element	AACGAC	987	6	+	Brassica oleracea
764	Hormone	FcGSTU37	TGA-element	AACGAC	1018	6	-	Brassica oleracea
765	Hormone	FcGSTU37	TGA-element	AACGAC	1072	6	+	Brassica oleracea
766	Hormone	FcGSTU37	TGA-element	AACGAC	1323	6	-	Brassica oleracea
767	Hormone	FcGSTU37	TGA-element	AACGAC	1398	6	+	Brassica oleracea
768	Hormone	FcGSTF1	TGA-element	AACGAC	618	6	+	Brassica oleracea
769	Hormone	FcGSTF2	TGA-element	AACGAC	515	6	-	Brassica oleracea
770	Hormone	FcGSTF2	TGA-element	AACGAC	1767	6	+	Brassica oleracea
771	Hormone	FcGSTF6	TGA-element	AACGAC	66	6	+	Brassica oleracea
772	Hormone	FcGSTU19	TGA-element	AACGAC	1347	6	-	Brassica oleracea
773	Hormone	FcGSTU20	TGA-element	AACGAC	555	6	-	Brassica oleracea
774	Hormone	FcEF1Bγ1	TGA-element	AACGAC	961	6	+	Brassica oleracea
775	Hormone	FcEF1Bγ1	TGA-element	AACGAC	1007	6	+	Brassica oleracea
776	Hormone	FcEF1Bγ1	TGA-element	AACGAC	1024	6	+	Brassica oleracea
777	Hormone	FcEF1Bγ1	TGA-element	AACGAC	1115	6	+	Brassica oleracea
778	Hormone	FcEF1Bγ1	TGA-element	AACGAC	1541	6	+	Brassica oleracea
779	Hormone	FcGSTU38	TGA-element	AACGAC	507	6	-	Brassica oleracea
780	Hormone	FcGSTU40	TGA-element	AACGAC	1434	6	+	Brassica oleracea
781	Hormone	FcGSTU42	TGA-element	AACGAC	314	6	-	Brassica oleracea
782	Hormone	FcGSTU22	TGA-element	AACGAC	367	6	-	Brassica oleracea
783	Hormone	FcGSTU23	TGA-element	AACGAC	210	6	+	Brassica oleracea
784	Hormone	FcGSTU23	TGA-element	AACGAC	1961	6	-	Brassica oleracea
785	Hormone	FcGSTU25	TGA-element	AACGAC	360	6	-	Brassica oleracea
786	Hormone	FcGSTU28	TGA-element	AACGAC	1166	6	-	Brassica oleracea
787	Hormone	FcGSTU28	TGA-element	AACGAC	1961	6	-	Brassica oleracea
788	Hormone	FcGSTU31	TGA-element	AACGAC	1095	6	+	Brassica oleracea
789	Hormone	FcGSTU31	TGA-element	AACGAC	1674	6	-	Brassica oleracea
790	Hormone	FcGSTU32	TGA-element	AACGAC	1192	6	-	Brassica oleracea
791	Hormone	FcGSTU32	TGA-element	AACGAC	1960	6	-	Brassica oleracea
792	Hormone	FcGSTU34	TGA-element	AACGAC	484	6	+	Brassica oleracea
793	Hormone	FcGSTU34	TGA-element	AACGAC	1823	6	-	Brassica oleracea
794	Hormone	FcGSTU10	TGA-element	AACGAC	305	6	-	Brassica oleracea
795	Hormone	FcGSTU13	TGA-element	AACGAC	1454	6	-	Brassica oleracea
796	Hormone	FcGSTU3	TGA-element	AACGAC	617	6	-	Brassica oleracea
797	Hormone	FcGSTU3	TGA-element	AACGAC	1200	6	-	Brassica oleracea
798	Hormone	FcGSTU4	TGA-element	AACGAC	513	6	-	Brassica oleracea
799	Development	FcGSTF2	CAT-box	GCCACT	1109	6	-	Arabidopsis thaliana
800	Development	FcGSTF6	CAT-box	GCCACT	415	6	-	Arabidopsis thaliana
801	Development	FcGSTF6	CAT-box	GCCACT	1556	6	+	Arabidopsis thaliana
802	Development	FcGSTU19	CAT-box	GCCACT	36	6	+	Arabidopsis thaliana
803	Development	FcEF1Bγ1	CAT-box	GCCACT	278	6	-	Arabidopsis thaliana
804	Development	FcGSTU38	CAT-box	GCCACT	1640	6	+	Arabidopsis thaliana
805	Development	FcGSTU7	CAT-box	GCCACT	1073	6	+	Arabidopsis thaliana
806	Development	FcGSTU22	CAT-box	GCCACT	992	6	+	Arabidopsis thaliana
807	Development	FcGSTU16	CAT-box	GCCACT	1104	6	+	Arabidopsis thaliana
808	Development	FcGSTU2	CAT-box	GCCACT	123	6	-	Arabidopsis thaliana
809	Development	FcGSTU3	CAT-box	GCCACT	46	6	+	Arabidopsis thaliana
810	Development	FcGSTU3	CAT-box	GCCACT	426	6	+	Arabidopsis thaliana
811	Development	FcGSTU18	CAT-box	GCCACT	1514	6	-	Arabidopsis thaliana
812	Development	FcGSTU1	CAT-box	GCCACT	1499	6	-	Arabidopsis thaliana
813	Development	FcGSTU9	CAT-box	GCCACT	1549	6	-	Arabidopsis thaliana
814	Development	FcGSTF2	circadian	CAAAGATATC	392	9	-	Lycopersicon esculentum
815	Development	FcEF1Bγ1	circadian	CAAAGATATC	360	9	-	Lycopersicon esculentum
816	Development	FcEF1Bγ1	circadian	CAAAGATATC	1576	9	+	Lycopersicon esculentum
817	Development	FcGSTU40	circadian	CAAAGATATC	824	9	-	Lycopersicon esculentum
818	Development	FcGSTU7	circadian	CAAAGATATC	714	9	-	Lycopersicon esculentum
819	Development	FcGSTU28	circadian	CAAAGATATC	1554	9	+	Lycopersicon esculentum
820	Development	FcGSTU29	circadian	CAAAGATATC	1078	9	-	Lycopersicon esculentum
821	Development	FcGSTU32	circadian	CAAAGATATC	1559	9	+	Lycopersicon esculentum
822	Development	FcGSTL3	GCN4_motif	TGAGTCA	1471	7	+	Oryza sativa
823	Development	FcGSTF6	GCN4_motif	TGAGTCA	1607	7	-	Oryza sativa
824	Development	FcGSTU40	GCN4_motif	TGAGTCA	364	7	+	Oryza sativa
825	Development	FcGSTU41	GCN4_motif	TGAGTCA	604	7	-	Oryza sativa
826	Development	FcGSTU42	GCN4_motif	TGAGTCA	769	7	+	Oryza sativa
827	Development	FcGSTU34	GCN4_motif	TGAGTCA	66	7	-	Oryza sativa
828	Development	FcGSTU13	GCN4_motif	TGAGTCA	589	7	-	Oryza sativa
829	Development	FcGSTL2	MBSI	TTTTTACGGTTA	218	11	-	Petunia hybrida
830	Development	FcGSTU29	MBSI	aaaAaaC(G/C)GTTA	277	10.5	+	Petunia hybrida
831	Development	FcGSTU31	MBSI	TTTTTACGGTTA	526	11	-	Petunia hybrida
832	Development	FcGSTU35	MBSI	TTTTTACGGTTA	413	11	+	Petunia hybrida
833	Development	FcGSTU7	RY-element	CATGCATG	1500	8	-	Helianthus annuus
834	Development	FcGSTU2	RY-element	CATGCATG	101	8	+	Helianthus annuus
835	Development	FcGSTL2	HD-Zip 1	CAAT(A/T)ATTG	1751	8.5	-	Arabidopsis thaliana
836	Development	FcGSTL3	HD-Zip 1	CAAT(A/T)ATTG	1104	8	-	Arabidopsis thaliana
837	Development	FcGSTL3	HD-Zip 1	CAAT(A/T)ATTG	1562	8.5	-	Arabidopsis thaliana
838	Development	FcGSTU22	HD-Zip 1	CAAT(A/T)ATTG	552	8	+	Arabidopsis thaliana
839	Development	FcGSTU25	HD-Zip 1	CAAT(A/T)ATTG	546	8	+	Arabidopsis thaliana
840	Development	FcGSTF5	O2-site	GATGA(C/T)(A/G)TG(A/G)	124	8	-	Zea mays
841	Development	FcGSTU38	O2-site	GATGACATGG	452	9	+	Zea mays
842	Development	FcGSTU38	O2-site	GATGA(C/T)(A/G)TG(A/G)	1941	8	-	Zea mays
843	Development	FcGSTU39	O2-site	GATGATGTGG	1035	9	+	Zea mays
844	Development	FcGSTU40	O2-site	GATGA(C/T)(A/G)TG(A/G)	1942	8	-	Zea mays
845	Development	FcGSTU42	O2-site	GATGA(C/T)(A/G)TG(A/G)	1019	8	-	Zea mays
846	Development	FcGSTU16	O2-site	GATGATGTGG	1196	9	+	Zea mays
847	Development	FcGSTU17	O2-site	GATGATGTGG	1416	9	+	Zea mays
848	Development	FcGSTU3	O2-site	GTTGACGTGA	620	9	+	Zea mays
849	Development	FcGSTT1	O2-site	GATGA(C/T)(A/G)TG(A/G)	368	8.5	+	Zea mays
850	Development	FcGSTT1	O2-site	GTTGACGTGA	699	9	-	Zea mays
851	Development	FcGSTT1	O2-site	GATGATGTGG	1277	9	+	Zea mays
852	Development	FcGSTT1	O2-site	GATGACATGG	1750	9	+	Zea mays
853	Development	FcGSTU16	MSA-like	TCAAACGGT	1442	9	-	Catharanthus roseus
854	Development	FcGSTU2	MSA-like	(T/C)C(T/C)AACGG(T/C)(T/C)A	864	8.5	-	Catharanthus roseus
855	Light	FcGSTU36	3-AF1 binding site	TAAGAGAGGAA	807	11	+	Solanum tuberosum
856	Light	FcGSTU20	3-AF1 binding site	TAAGAGAGGAA	787	10	-	Solanum tuberosum
857	Light	FcGSTU14	3-AF1 binding site	TAAGAGAGGAA	802	10	-	Solanum tuberosum
858	Light	FcGSTU18	3-AF1 binding site	TAAGAGAGGAA	1081	10	-	Solanum tuberosum
859	Light	FcGSTU36	AE-box	AGAAACAA	430	8	-	Arabidopsis thaliana
860	Light	FcGSTL2	AE-box	AGAAACTT	461	8	+	Arabidopsis thaliana
861	Light	FcGSTF3	AE-box	AGAAACAA	987	8	+	Arabidopsis thaliana
862	Light	FcGSTF3	AE-box	AGAAACAA	1568	8	-	Arabidopsis thaliana
863	Light	FcGSTF4	AE-box	AGAAACAA	829	8	+	Arabidopsis thaliana
864	Light	FcGSTF5	AE-box	AGAAACAA	1271	8	+	Arabidopsis thaliana
865	Light	FcGSTU19	AE-box	AGAAACTT	1965	8	+	Arabidopsis thaliana
866	Light	FcGSTL1	AE-box	AGAAACTT	271	8	-	Arabidopsis thaliana
867	Light	FcGSTL1	AE-box	AGAAACAA	898	8	-	Arabidopsis thaliana
868	Light	FcGSTL1	AE-box	AGAAACTT	1130	8	+	Arabidopsis thaliana
869	Light	FcEF1Bγ1	AE-box	AGAAACAA	265	8	-	Arabidopsis thaliana
870	Light	FcEF1Bγ1	AE-box	AGAAACAA	1309	8	+	Arabidopsis thaliana
871	Light	FcEF1Bγ1	AE-box	AGAAACAA	1747	8	-	Arabidopsis thaliana
872	Light	FcGSTU38	AE-box	AGAAACAA	65	8	+	Arabidopsis thaliana
873	Light	FcGSTU38	AE-box	AGAAACAA	743	8	-	Arabidopsis thaliana
874	Light	FcGSTU39	AE-box	AGAAACAA	1139	8	-	Arabidopsis thaliana
875	Light	FcGSTU24	AE-box	AGAAACTT	292	8	-	Arabidopsis thaliana
876	Light	FcGSTU24	AE-box	AGAAACTT	451	8	-	Arabidopsis thaliana
877	Light	FcGSTU24	AE-box	AGAAACTT	471	8	-	Arabidopsis thaliana
878	Light	FcGSTU28	AE-box	AGAAACAA	1002	8	-	Arabidopsis thaliana
879	Light	FcGSTU30	AE-box	AGAAACTT	285	8	-	Arabidopsis thaliana
880	Light	FcGSTU32	AE-box	AGAAACAA	1029	8	-	Arabidopsis thaliana
881	Light	FcGSTU12	AE-box	AGAAACAA	960	8	-	Arabidopsis thaliana
882	Light	FcGSTU14	AE-box	AGAAACTT	1188	8	-	Arabidopsis thaliana
883	Light	FcGSTU14	AE-box	AGAAACTT	1295	8	-	Arabidopsis thaliana
884	Light	FcGSTU15	AE-box	AGAAACTT	1452	8	+	Arabidopsis thaliana
885	Light	FcGSTU16	AE-box	AGAAACTT	1635	8	+	Arabidopsis thaliana
886	Light	FcGSTF3	ATCT-motif	AATCTAATCC	579	9	+	Pisum sativum
887	Light	FcGSTF4	ATCT-motif	AATCTAATCC	416	9	+	Pisum sativum
888	Light	FcGSTF5	ATCT-motif	AATCTAATCC	614	9	-	Pisum sativum
889	Light	FcGSTF5	ATCT-motif	AATCTAATCC	854	9	+	Pisum sativum
890	Light	FcGSTU28	ATCT-motif	AATCTAATCC	580	9	+	Pisum sativum
891	Light	FcGSTU32	ATCT-motif	AATCTAATCC	606	9	+	Pisum sativum
892	Light	FcGSTU13	ATCT-motif	AATCTAATCC	1388	10	+	Pisum sativum
893	Light	FcGSTU17	ATCT-motif	AATCTAATCC	876	9	-	Pisum sativum
894	Light	FcGSTU37	Box 4	ATTAAT	38	6	+	Petroselinum crispum
895	Light	FcGSTU37	Box 4	ATTAAT	1119	6	-	Petroselinum crispum
896	Light	FcGSTU8	Box 4	ATTAAT	1395	6	-	Petroselinum crispum
897	Light	FcGSTU8	Box 4	ATTAAT	1482	6	-	Petroselinum crispum
898	Light	FcGSTF1	Box 4	ATTAAT	1324	6	-	Petroselinum crispum
899	Light	FcGSTF2	Box 4	ATTAAT	1200	6	-	Petroselinum crispum
900	Light	FcGSTF2	Box 4	ATTAAT	1493	6	-	Petroselinum crispum
901	Light	FcGSTL2	Box 4	ATTAAT	491	6	+	Petroselinum crispum
902	Light	FcGSTL2	Box 4	ATTAAT	528	6	+	Petroselinum crispum
903	Light	FcGSTL2	Box 4	ATTAAT	599	6	+	Petroselinum crispum
904	Light	FcGSTL2	Box 4	ATTAAT	812	6	+	Petroselinum crispum
905	Light	FcGSTL2	Box 4	ATTAAT	833	6	+	Petroselinum crispum
906	Light	FcGSTL2	Box 4	ATTAAT	859	6	+	Petroselinum crispum
907	Light	FcGSTL3	Box 4	ATTAAT	636	6	+	Petroselinum crispum
908	Light	FcGSTL3	Box 4	ATTAAT	987	6	+	Petroselinum crispum
909	Light	FcGSTL3	Box 4	ATTAAT	1015	6	-	Petroselinum crispum
910	Light	FcGSTL3	Box 4	ATTAAT	1019	6	-	Petroselinum crispum
911	Light	FcGSTL3	Box 4	ATTAAT	1054	6	-	Petroselinum crispum
912	Light	FcGSTL3	Box 4	ATTAAT	1058	6	-	Petroselinum crispum
913	Light	FcGSTL3	Box 4	ATTAAT	1065	6	-	Petroselinum crispum
914	Light	FcGSTL3	Box 4	ATTAAT	1069	6	-	Petroselinum crispum
915	Light	FcGSTL3	Box 4	ATTAAT	1076	6	-	Petroselinum crispum
916	Light	FcGSTL3	Box 4	ATTAAT	1813	6	-	Petroselinum crispum
917	Light	FcGSTF3	Box 4	ATTAAT	629	6	+	Petroselinum crispum
918	Light	FcGSTF3	Box 4	ATTAAT	934	6	+	Petroselinum crispum
919	Light	FcGSTF3	Box 4	ATTAAT	952	6	+	Petroselinum crispum
920	Light	FcGSTF3	Box 4	ATTAAT	1656	6	-	Petroselinum crispum
921	Light	FcGSTF4	Box 4	ATTAAT	444	6	+	Petroselinum crispum
922	Light	FcGSTF4	Box 4	ATTAAT	1629	6	-	Petroselinum crispum
923	Light	FcGSTF4	Box 4	ATTAAT	1648	6	-	Petroselinum crispum
924	Light	FcGSTF5	Box 4	ATTAAT	904	6	+	Petroselinum crispum
925	Light	FcGSTF5	Box 4	ATTAAT	1235	6	-	Petroselinum crispum
926	Light	FcGSTF6	Box 4	ATTAAT	461	6	+	Petroselinum crispum
927	Light	FcGSTU19	Box 4	ATTAAT	1401	6	-	Petroselinum crispum
928	Light	FcGSTU19	Box 4	ATTAAT	1607	6	-	Petroselinum crispum
929	Light	FcGSTU20	Box 4	ATTAAT	100	6	+	Petroselinum crispum
930	Light	FcGSTU20	Box 4	ATTAAT	381	6	+	Petroselinum crispum
931	Light	FcGSTU20	Box 4	ATTAAT	797	6	+	Petroselinum crispum
932	Light	FcGSTU20	Box 4	ATTAAT	1939	6	-	Petroselinum crispum
933	Light	FcGSTL1	Box 4	ATTAAT	429	6	+	Petroselinum crispum
934	Light	FcGSTL1	Box 4	ATTAAT	779	6	+	Petroselinum crispum
935	Light	FcGSTL1	Box 4	ATTAAT	964	6	+	Petroselinum crispum
936	Light	FcGSTU38	Box 4	ATTAAT	820	6	+	Petroselinum crispum
937	Light	FcGSTU38	Box 4	ATTAAT	1694	6	-	Petroselinum crispum
938	Light	FcGSTU39	Box 4	ATTAAT	1112	6	-	Petroselinum crispum
939	Light	FcGSTU39	Box 4	ATTAAT	1380	6	-	Petroselinum crispum
940	Light	FcGSTU40	Box 4	ATTAAT	329	6	+	Petroselinum crispum
941	Light	FcGSTU40	Box 4	ATTAAT	1744	6	-	Petroselinum crispum
942	Light	FcGSTU40	Box 4	ATTAAT	1806	6	-	Petroselinum crispum
943	Light	FcGSTU41	Box 4	ATTAAT	148	6	+	Petroselinum crispum
944	Light	FcGSTU41	Box 4	ATTAAT	1737	6	-	Petroselinum crispum
945	Light	FcGSTU41	Box 4	ATTAAT	1768	6	-	Petroselinum crispum
946	Light	FcGSTU42	Box 4	ATTAAT	609	6	+	Petroselinum crispum
947	Light	FcGSTU42	Box 4	ATTAAT	700	6	+	Petroselinum crispum
948	Light	FcGSTU42	Box 4	ATTAAT	791	6	+	Petroselinum crispum
949	Light	FcGSTU42	Box 4	ATTAAT	1596	6	-	Petroselinum crispum
950	Light	FcGSTU42	Box 4	ATTAAT	1608	6	-	Petroselinum crispum
951	Light	FcGSTU42	Box 4	ATTAAT	1612	6	-	Petroselinum crispum
952	Light	FcGSTU42	Box 4	ATTAAT	1638	6	-	Petroselinum crispum
953	Light	FcGSTU42	Box 4	ATTAAT	1642	6	-	Petroselinum crispum
954	Light	FcGSTU42	Box 4	ATTAAT	1857	6	-	Petroselinum crispum
955	Light	FcGSTU5	Box 4	ATTAAT	1648	6	-	Petroselinum crispum
956	Light	FcGSTU5	Box 4	ATTAAT	1683	6	-	Petroselinum crispum
957	Light	FcGSTU6	Box 4	ATTAAT	1663	6	-	Petroselinum crispum
958	Light	FcGSTU6	Box 4	ATTAAT	1698	6	-	Petroselinum crispum
959	Light	FcGSTU22	Box 4	ATTAAT	605	6	+	Petroselinum crispum
960	Light	FcGSTU22	Box 4	ATTAAT	609	6	+	Petroselinum crispum
961	Light	FcGSTU22	Box 4	ATTAAT	671	6	+	Petroselinum crispum
962	Light	FcGSTU22	Box 4	ATTAAT	1001	6	+	Petroselinum crispum
963	Light	FcGSTU22	Box 4	ATTAAT	1152	6	-	Petroselinum crispum
964	Light	FcGSTU22	Box 4	ATTAAT	1552	6	-	Petroselinum crispum
965	Light	FcGSTU22	Box 4	ATTAAT	1859	6	-	Petroselinum crispum
966	Light	FcGSTU23	Box 4	ATTAAT	441	6	+	Petroselinum crispum
967	Light	FcGSTU24	Box 4	ATTAAT	805	6	+	Petroselinum crispum
968	Light	FcGSTU24	Box 4	ATTAAT	951	6	+	Petroselinum crispum
969	Light	FcGSTU24	Box 4	ATTAAT	1066	6	-	Petroselinum crispum
970	Light	FcGSTU24	Box 4	ATTAAT	1929	6	-	Petroselinum crispum
971	Light	FcGSTU25	Box 4	ATTAAT	599	6	+	Petroselinum crispum
972	Light	FcGSTU25	Box 4	ATTAAT	603	6	+	Petroselinum crispum
973	Light	FcGSTU25	Box 4	ATTAAT	665	6	+	Petroselinum crispum
974	Light	FcGSTU25	Box 4	ATTAAT	1145	6	-	Petroselinum crispum
975	Light	FcGSTU25	Box 4	ATTAAT	1528	6	-	Petroselinum crispum
976	Light	FcGSTU25	Box 4	ATTAAT	1832	6	-	Petroselinum crispum
977	Light	FcGSTU26	Box 4	ATTAAT	558	6	+	Petroselinum crispum
978	Light	FcGSTU27	Box 4	ATTAAT	663	6	+	Petroselinum crispum
979	Light	FcGSTU27	Box 4	ATTAAT	1865	6	-	Petroselinum crispum
980	Light	FcGSTU29	Box 4	ATTAAT	1720	6	-	Petroselinum crispum
981	Light	FcGSTU30	Box 4	ATTAAT	651	6	+	Petroselinum crispum
982	Light	FcGSTU30	Box 4	ATTAAT	1465	6	-	Petroselinum crispum
983	Light	FcGSTU30	Box 4	ATTAAT	1663	6	-	Petroselinum crispum
984	Light	FcGSTU32	Box 4	ATTAAT	200	6	+	Petroselinum crispum
985	Light	FcGSTU33	Box 4	ATTAAT	1520	6	-	Petroselinum crispum
986	Light	FcGSTU33	Box 4	ATTAAT	1707	6	-	Petroselinum crispum
987	Light	FcGSTU34	Box 4	ATTAAT	393	6	+	Petroselinum crispum
988	Light	FcGSTU34	Box 4	ATTAAT	609	6	+	Petroselinum crispum
989	Light	FcGSTU34	Box 4	ATTAAT	861	6	+	Petroselinum crispum
990	Light	FcGSTU34	Box 4	ATTAAT	1639	6	-	Petroselinum crispum
991	Light	FcGSTU35	Box 4	ATTAAT	265	6	+	Petroselinum crispum
992	Light	FcGSTU35	Box 4	ATTAAT	876	6	+	Petroselinum crispum
993	Light	FcGSTU35	Box 4	ATTAAT	990	6	+	Petroselinum crispum
994	Light	FcGSTU35	Box 4	ATTAAT	1087	6	-	Petroselinum crispum
995	Light	FcGSTU35	Box 4	ATTAAT	1143	6	-	Petroselinum crispum
996	Light	FcGSTU35	Box 4	ATTAAT	1159	6	-	Petroselinum crispum
997	Light	FcGSTU10	Box 4	ATTAAT	824	6	+	Petroselinum crispum
998	Light	FcGSTU10	Box 4	ATTAAT	1122	6	-	Petroselinum crispum
999	Light	FcGSTU10	Box 4	ATTAAT	1171	6	-	Petroselinum crispum
1000	Light	FcGSTU10	Box 4	ATTAAT	1210	6	-	Petroselinum crispum
1001	Light	FcGSTU10	Box 4	ATTAAT	1222	6	-	Petroselinum crispum
1002	Light	FcGSTU10	Box 4	ATTAAT	1687	6	-	Petroselinum crispum
1003	Light	FcGSTU10	Box 4	ATTAAT	1765	6	-	Petroselinum crispum
1004	Light	FcGSTU11	Box 4	ATTAAT	813	6	+	Petroselinum crispum
1005	Light	FcGSTU11	Box 4	ATTAAT	1114	6	-	Petroselinum crispum
1006	Light	FcGSTU11	Box 4	ATTAAT	1202	6	-	Petroselinum crispum
1007	Light	FcGSTU11	Box 4	ATTAAT	1214	6	-	Petroselinum crispum
1008	Light	FcGSTU11	Box 4	ATTAAT	1679	6	-	Petroselinum crispum
1009	Light	FcGSTU11	Box 4	ATTAAT	1757	6	-	Petroselinum crispum
1010	Light	FcGSTU12	Box 4	ATTAAT	1033	6	-	Petroselinum crispum
1011	Light	FcGSTU12	Box 4	ATTAAT	1116	6	-	Petroselinum crispum
1012	Light	FcGSTU12	Box 4	ATTAAT	1123	6	-	Petroselinum crispum
1013	Light	FcGSTU13	Box 4	ATTAAT	1106	6	-	Petroselinum crispum
1014	Light	FcGSTU13	Box 4	ATTAAT	1582	6	-	Petroselinum crispum
1015	Light	FcGSTU14	Box 4	ATTAAT	1124	6	-	Petroselinum crispum
1016	Light	FcGSTU14	Box 4	ATTAAT	1351	6	-	Petroselinum crispum
1017	Light	FcGSTU14	Box 4	ATTAAT	1358	6	-	Petroselinum crispum
1018	Light	FcGSTU14	Box 4	ATTAAT	1685	6	-	Petroselinum crispum
1019	Light	FcGSTU15	Box 4	ATTAAT	824	6	+	Petroselinum crispum
1020	Light	FcGSTU16	Box 4	ATTAAT	822	6	+	Petroselinum crispum
1021	Light	FcGSTU2	Box 4	ATTAAT	1841	6	-	Petroselinum crispum
1022	Light	FcGSTU4	Box 4	ATTAAT	394	6	+	Petroselinum crispum
1023	Light	FcGSTU4	Box 4	ATTAAT	482	6	+	Petroselinum crispum
1024	Light	FcGSTU4	Box 4	ATTAAT	685	6	+	Petroselinum crispum
1025	Light	FcGSTU4	Box 4	ATTAAT	1363	6	-	Petroselinum crispum
1026	Light	FcGSTU21	Box 4	ATTAAT	2009	6	-	Petroselinum crispum
1027	Light	FcGSTU18	Box 4	ATTAAT	221	6	+	Petroselinum crispum
1028	Light	FcGSTU18	Box 4	ATTAAT	807	6	+	Petroselinum crispum
1029	Light	FcGSTT1	Box 4	ATTAAT	104	6	+	Petroselinum crispum
1030	Light	FcGSTT1	Box 4	ATTAAT	348	6	+	Petroselinum crispum
1031	Light	FcGSTT1	Box 4	ATTAAT	630	6	+	Petroselinum crispum
1032	Light	FcGSTU1	Box 4	ATTAAT	971	6	+	Petroselinum crispum
1033	Light	FcGSTU9	Box 4	ATTAAT	464	6	+	Petroselinum crispum
1034	Light	FcGSTU9	Box 4	ATTAAT	1895	6	-	Petroselinum crispum
1035	Light	FcGSTL2	chs-CMA1a	TTACTTAA	500	8	-	Daucus carota
1036	Light	FcGSTU38	chs-CMA1a	TTACTTAA	1501	8	-	Daucus carota
1037	Light	FcGSTU40	chs-CMA1a	TTACTTAA	982	8	+	Daucus carota
1038	Light	FcGSTU40	chs-CMA1a	TTACTTAA	1509	8	-	Daucus carota
1039	Light	FcGSTU41	chs-CMA1a	TTACTTAA	906	8	+	Daucus carota
1040	Light	FcGSTU6	chs-CMA1a	TTACTTAA	1551	8	+	Daucus carota
1041	Light	FcGSTU30	chs-CMA1a	TTACTTAA	1063	8	-	Daucus carota
1042	Light	FcGSTU12	chs-CMA1a	TTACTTAA	1170	8	+	Daucus carota
1043	Light	FcGSTU4	chs-CMA1a	TTACTTAA	1031	8	-	Daucus carota
1044	Light	FcGSTU18	chs-CMA1a	TTACTTAA	552	8	+	Daucus carota
1045	Light	FcGSTT1	chs-CMA1a	TTACTTAA	1156	8	-	Daucus carota
1046	Light	FcGSTL2	GA-motif	ATAGATAA	1773	8	-	Arabidopsis thaliana
1047	Light	FcGSTF3	GA-motif	ATAGATAA	1507	8	+	Arabidopsis thaliana
1048	Light	FcGSTF5	GA-motif	ATAGATAA	1791	8	+	Arabidopsis thaliana
1049	Light	FcGSTU20	GA-motif	ATAGATAA	352	8	-	Arabidopsis thaliana
1050	Light	FcGSTU38	GA-motif	ATAGATAA	1020	8	-	Arabidopsis thaliana
1051	Light	FcGSTU39	GA-motif	ATAGATAA	1418	8	-	Arabidopsis thaliana
1052	Light	FcGSTU5	GA-motif	ATAGATAA	678	8	+	Arabidopsis thaliana
1053	Light	FcGSTU6	GA-motif	ATAGATAA	601	8	+	Arabidopsis thaliana
1054	Light	FcGSTU33	GA-motif	ATAGATAA	1878	8	-	Arabidopsis thaliana
1055	Light	FcGSTU15	GA-motif	ATAGATAA	1968	8	-	Arabidopsis thaliana
1056	Light	FcGSTL3	GATA-motif	GATAGGG	1216	7	-	Pisum sativum
1057	Light	FcGSTF5	GATA-motif	GATAGGA	831	7	-	Arabidopsis thaliana
1058	Light	FcGSTF5	GATA-motif	GATAGGA	874	7	-	Arabidopsis thaliana
1059	Light	FcGSTF6	GATA-motif	AAGGATAAGG	219	9	+	Solanum tuberosum
1060	Light	FcGSTF6	GATA-motif	AAGGATAAGG	1614	9	-	Solanum tuberosum
1061	Light	FcGSTU20	GATA-motif	AAGGATAAGG	253	9	-	Solanum tuberosum
1062	Light	FcGSTL1	GATA-motif	AAGATAAGATT	1227	11	+	Arabidopsis thaliana
1063	Light	FcGSTU38	GATA-motif	AAGATAAGATT	959	10	-	Arabidopsis thaliana
1064	Light	FcGSTU38	GATA-motif	GATAGGG	1178	7	+	Pisum sativum
1065	Light	FcGSTU39	GATA-motif	AAGATAAGATT	522	10	-	Arabidopsis thaliana
1066	Light	FcGSTU39	GATA-motif	GATAGGG	535	7	-	Pisum sativum
1067	Light	FcGSTU40	GATA-motif	GATAGGA	1177	7	+	Arabidopsis thaliana
1068	Light	FcGSTU41	GATA-motif	AAGATAAGATT	1778	10	-	Arabidopsis thaliana
1069	Light	FcGSTU41	GATA-motif	AAGATAAGATT	1819	10	-	Arabidopsis thaliana
1070	Light	FcGSTU42	GATA-motif	GATAGGA	828	7	+	Arabidopsis thaliana
1071	Light	FcGSTU42	GATA-motif	AAGATAAGATT	1863	10	-	Arabidopsis thaliana
1072	Light	FcGSTU22	GATA-motif	AAGGATAAGG	409	9	+	Solanum tuberosum
1073	Light	FcGSTU25	GATA-motif	AAGGATAAGG	402	9	+	Solanum tuberosum
1074	Light	FcGSTU27	GATA-motif	GATAGGA	1246	7	+	Arabidopsis thaliana
1075	Light	FcGSTU27	GATA-motif	AAGATAAGATT	1617	10	-	Arabidopsis thaliana
1076	Light	FcGSTU32	GATA-motif	GATAGGA	1930	7	-	Arabidopsis thaliana
1077	Light	FcGSTU33	GATA-motif	AAGATAAGATT	1896	10	-	Arabidopsis thaliana
1078	Light	FcGSTU34	GATA-motif	AAGATAAGATT	1161	10	-	Arabidopsis thaliana
1079	Light	FcGSTU12	GATA-motif	AAGATAAGATT	1695	11	-	Arabidopsis thaliana
1080	Light	FcGSTU16	GATA-motif	GATAGGA	112	7	+	Arabidopsis thaliana
1081	Light	FcGSTU17	GATA-motif	GATAGGG	1234	7	+	Pisum sativum
1082	Light	FcGSTU3	GATA-motif	AAGGATAAGG	1761	9	-	Solanum tuberosum
1083	Light	FcGSTU3	GATA-motif	GATAGGA	2012	7	+	Arabidopsis thaliana
1084	Light	FcGSTU4	GATA-motif	AAGGATAAGG	1880	9	-	Solanum tuberosum
1085	Light	FcGSTU18	GATA-motif	AAGGATAAGG	80	9	-	Solanum tuberosum
1086	Light	FcGSTU9	GATA-motif	AAGATAAGATT	1119	10	+	Arabidopsis thaliana
1087	Light	FcGSTU36	G-box	CACGAC	1237	6	+	Zea mays
1088	Light	FcGSTU37	G-box	CACGAC	632	6	+	Zea mays
1089	Light	FcGSTU37	G-box	TACGTG	689	6	+	Arabidopsis thaliana
1090	Light	FcGSTU37	G-box	CACGTC	944	6	-	Zea mays
1091	Light	FcGSTU37	G-box	ACACGTGT	1163	8	-	Brassica napus
1092	Light	FcGSTU37	G-box	CACGTG	1164	6	-	Arabidopsis thaliana
1093	Light	FcGSTU37	G-box	CACGTC	1320	6	+	Zea mays
1094	Light	FcGSTU37	G-Box	CACGTT	579	6	-	Pisum sativum
1095	Light	FcGSTU37	G-Box	CACGTT	788	6	-	Pisum sativum
1096	Light	FcGSTU37	G-Box	CACGTT	830	6	-	Pisum sativum
1097	Light	FcGSTU37	G-Box	CACGTG	1164	6	-	Pisum sativum
1098	Light	FcGSTU8	G-Box	CACGTT	1140	6	+	Pisum sativum
1099	Light	FcGSTF1	G-Box	CACGTG	59	6	+	Pisum sativum
1100	Light	FcGSTF1	G-Box	CACGTG	69	6	+	Pisum sativum
1101	Light	FcGSTF1	G-Box	CACGTT	149	6	-	Pisum sativum
1102	Light	FcGSTF1	G-Box	CACGTT	779	6	-	Pisum sativum
1103	Light	FcGSTF1	G-Box	CACGTT	1130	6	-	Pisum sativum
1104	Light	FcGSTF1	G-Box	CACGTT	1746	6	-	Pisum sativum
1105	Light	FcGSTF1	G-Box	CACGTG	1760	6	-	Pisum sativum
1106	Light	FcGSTF1	G-Box	CACGTG	1775	6	-	Pisum sativum
1107	Light	FcGSTF1	G-box	TACGTG	49	6	-	Arabidopsis thaliana
1108	Light	FcGSTF1	G-box	CACGTG	59	6	+	Arabidopsis thaliana
1109	Light	FcGSTF1	G-box	CACGTG	69	6	+	Arabidopsis thaliana
1110	Light	FcGSTF1	G-box	CACGTG	1760	6	-	Arabidopsis thaliana
1111	Light	FcGSTF1	G-box	CACGTG	1775	6	-	Arabidopsis thaliana
1112	Light	FcGSTF2	G-box	CACGAC	275	6	-	Zea mays
1113	Light	FcGSTF2	G-box	TACGTG	1393	6	+	Arabidopsis thaliana
1114	Light	FcGSTF2	G-box	CACGAC	1922	6	+	Zea mays
1115	Light	FcGSTL2	G-Box	CACGTG	1713	6	-	Pisum sativum
1116	Light	FcGSTL2	G-Box	CACGTG	1833	6	-	Pisum sativum
1117	Light	FcGSTL2	G-box	CACGTG	1713	6	-	Arabidopsis thaliana
1118	Light	FcGSTL2	G-box	CACGTG	1833	6	-	Arabidopsis thaliana
1119	Light	FcGSTL3	G-box	TACGTG	873	6	-	Arabidopsis thaliana
1120	Light	FcGSTL3	G-box	CACGAC	1342	6	+	Zea mays
1121	Light	FcGSTL3	G-box	CACGAC	1357	6	-	Zea mays
1122	Light	FcGSTF3	G-Box	CACGTG	1113	6	-	Pisum sativum
1123	Light	FcGSTF3	G-Box	CACGTG	1135	6	-	Pisum sativum
1124	Light	FcGSTF3	G-box	TACGTG	1028	6	-	Arabidopsis thaliana
1125	Light	FcGSTF3	G-box	TACGTG	1091	6	+	Arabidopsis thaliana
1126	Light	FcGSTF3	G-box	CACGTG	1113	6	-	Arabidopsis thaliana
1127	Light	FcGSTF3	G-box	CACGTG	1135	6	-	Arabidopsis thaliana
1128	Light	FcGSTF3	G-box	CACGAC	1708	6	+	Zea mays
1129	Light	FcGSTF3	G-box	TACGTG	1760	6	-	Arabidopsis thaliana
1130	Light	FcGSTF4	G-Box	TCCACATGGCA	310	10	+	Triticum aestivum
1131	Light	FcGSTF4	G-Box	CACGTG	957	6	+	Pisum sativum
1132	Light	FcGSTF4	G-Box	CACGTT	1730	6	-	Pisum sativum
1133	Light	FcGSTF4	G-box	tcCACGTGTCACT	310	12	+	Glycine max
1134	Light	FcGSTF4	G-box	TACGTG	935	6	+	Arabidopsis thaliana
1135	Light	FcGSTF4	G-box	CACGTG	957	6	+	Arabidopsis thaliana
1136	Light	FcGSTF4	G-box	TACGTG	1759	6	-	Arabidopsis thaliana
1137	Light	FcGSTF4	G-box	CACGAC	1808	6	+	Zea mays
1138	Light	FcGSTF5	G-box	TACGTG	1376	6	+	Arabidopsis thaliana
1139	Light	FcGSTF6	G-box	CACGTG	313	6	+	Arabidopsis thaliana
1140	Light	FcGSTF6	G-box	tgACACGTGGCA	614	11	-	Lycopersicon esculentum
1141	Light	FcGSTF6	G-box	CACGTG	617	6	+	Arabidopsis thaliana
1142	Light	FcGSTF6	G-box	CACGAC	718	6	+	Zea mays
1143	Light	FcGSTF6	G-box	CACGAC	744	6	+	Zea mays
1144	Light	FcGSTF6	G-box	CACGAC	803	6	+	Zea mays
1145	Light	FcGSTF6	G-box	CACGAC	1092	6	-	Zea mays
1146	Light	FcGSTF6	G-box	CACGAC	1292	6	+	Zea mays
1147	Light	FcGSTF6	G-Box	CACGTG	313	6	+	Pisum sativum
1148	Light	FcGSTF6	G-Box	CACGTG	617	6	+	Pisum sativum
1149	Light	FcGSTF6	G-Box	CACGTT	1644	6	+	Pisum sativum
1150	Light	FcGSTU19	G-box	CACGTC	570	6	-	Zea mays
1151	Light	FcGSTU19	G-box	TACGTG	957	6	+	Arabidopsis thaliana
1152	Light	FcGSTU20	G-box	TAACACGTAG	660	9	-	Brassica oleracea
1153	Light	FcGSTU20	G-box	TACGTG	661	6	+	Arabidopsis thaliana
1154	Light	FcGSTU20	G-Box	CACGTT	1546	6	+	Pisum sativum
1155	Light	FcGSTL1	G-Box	CACGTT	308	6	+	Pisum sativum
1156	Light	FcGSTL1	G-Box	TCCACATGGCA	1199	10	+	Triticum aestivum
1157	Light	FcGSTL1	G-Box	CACGTT	1336	6	+	Pisum sativum
1158	Light	FcEF1Bγ1	G-Box	CACGTT	144	6	-	Pisum sativum
1159	Light	FcGSTU38	G-Box	CACGTT	1671	6	+	Pisum sativum
1160	Light	FcGSTU38	G-box	CACGAC	499	6	+	Zea mays
1161	Light	FcGSTU38	G-box	CACGTC	631	6	+	Zea mays
1162	Light	FcGSTU38	G-box	TACGTG	1006	6	+	Arabidopsis thaliana
1163	Light	FcGSTU38	G-box	CACGAC	1622	6	-	Zea mays
1164	Light	FcGSTU39	G-box	TACGTG	96	6	-	Arabidopsis thaliana
1165	Light	FcGSTU40	G-Box	CACGTT	1676	6	+	Pisum sativum
1166	Light	FcGSTU40	G-box	TACGTG	561	6	+	Arabidopsis thaliana
1167	Light	FcGSTU41	G-box	CACGAC	1530	6	-	Zea mays
1168	Light	FcGSTU42	G-box	CACGAC	195	6	+	Zea mays
1169	Light	FcGSTU42	G-Box	CACGTT	302	6	+	Pisum sativum
1170	Light	FcGSTU42	G-Box	CACGTT	556	6	+	Pisum sativum
1171	Light	FcGSTU5	G-box	CACGTC	1786	6	+	Zea mays
1172	Light	FcGSTU6	G-box	CACGTC	1795	6	+	Zea mays
1173	Light	FcGSTU7	G-box	CACGTC	1770	6	+	Zea mays
1174	Light	FcGSTU22	G-box	CACGAC	265	6	-	Zea mays
1175	Light	FcGSTU22	G-box	TACGTG	1193	6	-	Arabidopsis thaliana
1176	Light	FcGSTU22	G-box	TACGTG	1246	6	+	Arabidopsis thaliana
1177	Light	FcGSTU22	G-box	CACGAC	1429	6	-	Zea mays
1178	Light	FcGSTU23	G-box	CACGTG	1772	6	-	Arabidopsis thaliana
1179	Light	FcGSTU23	G-Box	CACGTG	1772	6	-	Pisum sativum
1180	Light	FcGSTU24	G-box	CACGTC	1554	6	+	Zea mays
1181	Light	FcGSTU25	G-box	CACGAC	258	6	-	Zea mays
1182	Light	FcGSTU25	G-box	CACGAC	1405	6	-	Zea mays
1183	Light	FcGSTU27	G-Box	CACGTT	1417	6	-	Pisum sativum
1184	Light	FcGSTU27	G-box	CACGAC	2003	6	-	Zea mays
1185	Light	FcGSTU28	G-Box	CACGTG	1772	6	-	Pisum sativum
1186	Light	FcGSTU28	G-box	CACGAC	1131	6	-	Zea mays
1187	Light	FcGSTU28	G-box	CACGTG	1772	6	-	Arabidopsis thaliana
1188	Light	FcGSTU29	G-Box	CACGTT	1071	6	-	Pisum sativum
1189	Light	FcGSTU29	G-box	CACGTC	556	6	-	Zea mays
1190	Light	FcGSTU30	G-box	CACGAC	145	6	+	Zea mays
1191	Light	FcGSTU31	G-Box	CACGTT	262	6	-	Pisum sativum
1192	Light	FcGSTU31	G-Box	CACGTT	274	6	-	Pisum sativum
1193	Light	FcGSTU31	G-box	CACGAC	298	6	+	Zea mays
1194	Light	FcGSTU32	G-box	CACGAC	1157	6	-	Zea mays
1195	Light	FcGSTU32	G-box	CACGTG	1772	6	-	Arabidopsis thaliana
1196	Light	FcGSTU32	G-Box	CACGTG	1772	6	-	Pisum sativum
1197	Light	FcGSTU33	G-box	TACGTG	213	6	+	Arabidopsis thaliana
1198	Light	FcGSTU33	G-box	CACGAC	459	6	+	Zea mays
1199	Light	FcGSTU33	G-Box	CACGTT	90	6	+	Pisum sativum
1200	Light	FcGSTU33	G-Box	CACGTT	423	6	-	Pisum sativum
1201	Light	FcGSTU33	G-Box	CACGTT	435	6	-	Pisum sativum
1202	Light	FcGSTU34	G-box	TACGTG	321	6	+	Arabidopsis thaliana
1203	Light	FcGSTU34	G-box	CACGTC	1670	6	+	Zea mays
1204	Light	FcGSTU10	G-box	CACGTC	1360	6	+	Zea mays
1205	Light	FcGSTU11	G-Box	CACGTT	1353	6	+	Pisum sativum
1206	Light	FcGSTU12	G-box	TAACACGTAG	97	9	+	Brassica oleracea
1207	Light	FcGSTU12	G-box	TACGTG	100	6	-	Arabidopsis thaliana
1208	Light	FcGSTU12	G-box	TAACACGTAG	104	9	+	Brassica oleracea
1209	Light	FcGSTU12	G-box	CACGAC	436	6	-	Zea mays
1210	Light	FcGSTU15	G-box	CACGAC	293	6	-	Zea mays
1211	Light	FcGSTU16	G-box	CACGTG	1297	6	-	Arabidopsis thaliana
1212	Light	FcGSTU16	G-box	TACGTG	1431	6	+	Arabidopsis thaliana
1213	Light	FcGSTU16	G-Box	CACGTG	1297	6	-	Pisum sativum
1214	Light	FcGSTU17	G-Box	CACGTT	810	6	+	Pisum sativum
1215	Light	FcGSTU17	G-Box	CACGTT	820	6	+	Pisum sativum
1216	Light	FcGSTU17	G-Box	CACGTG	1919	6	-	Pisum sativum
1217	Light	FcGSTU17	G-box	TACGTG	1771	6	-	Arabidopsis thaliana
1218	Light	FcGSTU17	G-box	CACGTC	1863	6	-	Zea mays
1219	Light	FcGSTU17	G-box	CACGTG	1919	6	-	Arabidopsis thaliana
1220	Light	FcGSTU17	G-box	CCACGTAA	1926	8	-	Brassica napus
1221	Light	FcGSTU17	G-box	TACGTG	1927	6	+	Arabidopsis thaliana
1222	Light	FcGSTU2	G-Box	CACGTT	1422	6	+	Pisum sativum
1223	Light	FcGSTU2	G-Box	CACGTG	1504	6	-	Pisum sativum
1224	Light	FcGSTU2	G-Box	CACGTT	1654	6	+	Pisum sativum
1225	Light	FcGSTU2	G-Box	CACGTG	1722	6	-	Pisum sativum
1226	Light	FcGSTU2	G-box	TAACACGTAG	1503	9	-	Brassica oleracea
1227	Light	FcGSTU2	G-box	CACGTG	1504	6	-	Arabidopsis thaliana
1228	Light	FcGSTU2	G-box	TAACACGTAG	1721	9	-	Brassica oleracea
1229	Light	FcGSTU2	G-box	CACGTG	1722	6	-	Arabidopsis thaliana
1230	Light	FcGSTU3	G-box	CACGAC	553	6	-	Zea mays
1231	Light	FcGSTU3	G-box	GCCACGTGGA	1113	9	+	Arabidopsis thaliana
1232	Light	FcGSTU3	G-box	CACGTG	1115	6	-	Arabidopsis thaliana
1233	Light	FcGSTU3	G-Box	CACGTG	1115	6	-	Pisum sativum
1234	Light	FcGSTU3	G-Box	CACGTT	1402	6	-	Pisum sativum
1235	Light	FcGSTU4	G-Box	CACGTT	1577	6	-	Pisum sativum
1236	Light	FcGSTU21	G-box	CACGTC	687	6	-	Zea mays
1237	Light	FcGSTU21	G-Box	CACGTT	1388	6	+	Pisum sativum
1238	Light	FcGSTU18	G-box	CACGTC	1530	6	+	Zea mays
1239	Light	FcGSTT1	G-box	CACGTC	700	6	+	Zea mays
1240	Light	FcGSTU1	G-box	CACGAC	702	6	-	Zea mays
1241	Light	FcGSTU1	G-box	CACGAC	761	6	-	Zea mays
1242	Light	FcGSTU9	G-box	CACGAC	664	6	-	Zea mays
1243	Light	FcGSTU37	GT1-motif	GGTTAAT	467	7	+	Avena sativa
1244	Light	FcGSTU37	GT1-motif	GGTTAA	512	6	-	Arabidopsis thaliana
1245	Light	FcGSTU8	GT1-motif	GGTTAA	190	6	-	Arabidopsis thaliana
1246	Light	FcGSTU8	GT1-motif	GGTTAA	987	6	+	Arabidopsis thaliana
1247	Light	FcGSTF1	GT1-motif	GGTTAA	255	6	-	Arabidopsis thaliana
1248	Light	FcGSTF2	GT1-motif	GGTTAAT	71	7	+	Avena sativa
1249	Light	FcGSTF2	GT1-motif	GGTTAAT	1736	7	-	Avena sativa
1250	Light	FcGSTF2	GT1-motif	GGTTAA	1737	6	-	Arabidopsis thaliana
1251	Light	FcGSTL3	GT1-motif	GGTTAA	150	6	-	Arabidopsis thaliana
1252	Light	FcGSTF3	GT1-motif	GGTTAA	1892	6	+	Arabidopsis thaliana
1253	Light	FcGSTF4	GT1-motif	GGTTAA	1891	6	+	Arabidopsis thaliana
1254	Light	FcGSTU20	GT1-motif	GGTTAA	596	6	-	Arabidopsis thaliana
1255	Light	FcGSTU20	GT1-motif	GTGTGTGAA	1948	9	-	Solanum tuberosum
1256	Light	FcGSTL1	GT1-motif	GGTTAA	999	6	-	Arabidopsis thaliana
1257	Light	FcGSTL1	GT1-motif	GGTTAA	1874	6	-	Arabidopsis thaliana
1258	Light	FcEF1Bγ1	GT1-motif	GGTTAA	1674	6	+	Arabidopsis thaliana
1259	Light	FcGSTU40	GT1-motif	GGTTAA	1759	6	+	Arabidopsis thaliana
1260	Light	FcGSTU41	GT1-motif	GGTTAA	574	6	-	Arabidopsis thaliana
1261	Light	FcGSTU41	GT1-motif	GGTTAAT	1055	7	-	Avena sativa
1262	Light	FcGSTU41	GT1-motif	GGTTAA	1056	6	-	Arabidopsis thaliana
1263	Light	FcGSTU41	GT1-motif	GGTTAA	1320	6	+	Arabidopsis thaliana
1264	Light	FcGSTU22	GT1-motif	GGTTAA	2001	6	+	Arabidopsis thaliana
1265	Light	FcGSTU25	GT1-motif	GGTTAA	2001	6	+	Arabidopsis thaliana
1266	Light	FcGSTU26	GT1-motif	GGTTAA	594	6	+	Arabidopsis thaliana
1267	Light	FcGSTU26	GT1-motif	GGTTAAT	728	7	+	Avena sativa
1268	Light	FcGSTU29	GT1-motif	GGTTAA	22	6	+	Arabidopsis thaliana
1269	Light	FcGSTU29	GT1-motif	GGTTAA	284	6	+	Arabidopsis thaliana
1270	Light	FcGSTU30	GT1-motif	GGTTAA	819	6	+	Arabidopsis thaliana
1271	Light	FcGSTU31	GT1-motif	GGTTAA	525	6	-	Arabidopsis thaliana
1272	Light	FcGSTU33	GT1-motif	GGTTAA	993	6	+	Arabidopsis thaliana
1273	Light	FcGSTU34	GT1-motif	GGTTAA	1078	6	-	Arabidopsis thaliana
1274	Light	FcGSTU35	GT1-motif	GGTTAA	912	6	+	Arabidopsis thaliana
1275	Light	FcGSTU35	GT1-motif	GGTTAA	1046	6	+	Arabidopsis thaliana
1276	Light	FcGSTU11	GT1-motif	GGTTAA	1885	6	+	Arabidopsis thaliana
1277	Light	FcGSTU13	GT1-motif	GGTTAAT	861	7	+	Avena sativa
1278	Light	FcGSTU13	GT1-motif	GGTTAAT	1496	7	+	Avena sativa
1279	Light	FcGSTU14	GT1-motif	GGTTAA	648	6	+	Arabidopsis thaliana
1280	Light	FcGSTU14	GT1-motif	GGTTAAT	1346	7	+	Avena sativa
1281	Light	FcGSTU16	GT1-motif	GGTTAA	1281	6	+	Arabidopsis thaliana
1282	Light	FcGSTU16	GT1-motif	GGTTAA	1318	6	-	Arabidopsis thaliana
1283	Light	FcGSTU16	GT1-motif	GGTTAA	1374	6	-	Arabidopsis thaliana
1284	Light	FcGSTU17	GT1-motif	GGTTAA	1885	6	+	Arabidopsis thaliana
1285	Light	FcGSTU2	GT1-motif	GGTTAA	397	6	-	Arabidopsis thaliana
1286	Light	FcGSTU2	GT1-motif	GGTTAA	571	6	-	Arabidopsis thaliana
1287	Light	FcGSTU18	GT1-motif	GTGTGTGAA	812	9	-	Solanum tuberosum
1288	Light	FcGSTT1	GT1-motif	GGTTAAT	620	7	+	Avena sativa
1289	Light	FcGSTU1	GT1-motif	GGTTAA	560	6	+	Arabidopsis thaliana
1290	Light	FcGSTU9	GT1-motif	GGTTAA	490	6	+	Arabidopsis thaliana
1291	Light	FcGSTF2	I-box	cCATATCCAAT	824	10	+	Flaveria trinervia
1292	Light	FcGSTF2	I-box	gGATAAGGTG	1877	9	+	Zea mays
1293	Light	FcGSTF3	I-box	AGATAAGG	1158	8	+	Triticum aestivum
1294	Light	FcGSTF4	I-box	AGATAAGG	1001	8	+	Triticum aestivum
1295	Light	FcGSTF5	I-box	AGATAAGG	1443	8	+	Triticum aestivum
1296	Light	FcGSTF6	I-box	gGATAAGGTG	1612	9	-	Zea mays
1297	Light	FcGSTF6	I-box	AGATAAGG	1614	8	-	Triticum aestivum
1298	Light	FcGSTF6	I-box	GTATAAGGCC	1915	9	-	Larix laricina
1299	Light	FcGSTU19	I-box	cCATATCCAAT	1652	10	-	Flaveria trinervia
1300	Light	FcGSTU39	I-box	GGATGAGATAAGATT	522	15	-	Lycopersicon esculentum
1301	Light	FcGSTU39	I-box	TGATAATGT	1281	9	-	Solanum tuberosum
1302	Light	FcGSTU22	I-box	GATAAGGGT	1459	9	+	Arabidopsis thaliana
1303	Light	FcGSTU26	I-box	AGATAAGG	500	8	+	Triticum aestivum
1304	Light	FcGSTU29	I-box	GTATAAGGCC	870	9	+	Larix laricina
1305	Light	FcGSTU29	I-box	atGATAAGGTC	1628	10	+	Helianthus annuus
1306	Light	FcGSTU10	I-box	AGATAAGG	343	8	+	Triticum aestivum
1307	Light	FcGSTU11	I-box	AGATAAGG	341	8	+	Triticum aestivum
1308	Light	FcGSTU16	I-box	AAGATAAGGCT	1067	10	+	Gossypium hirsutum
1309	Light	FcGSTU17	I-box	TGATAATGT	792	9	-	Solanum tuberosum
1310	Light	FcGSTU17	I-box	atGATAAGGTC	1363	10	+	Helianthus annuus
1311	Light	FcGSTU2	I-box	AAGATAAGGCT	305	10	-	Gossypium hirsutum
1312	Light	FcGSTU3	I-box	atGATAAGGTC	1759	10	-	Helianthus annuus
1313	Light	FcGSTU4	I-box	atGATAAGGTC	1878	10	-	Helianthus annuus
1314	Light	FcGSTU18	I-box	atGATAAGGTC	78	10	-	Helianthus annuus
1315	Light	FcGSTT1	I-box	AGATAAGG	563	8	+	Triticum aestivum
1316	Light	FcGSTU1	I-box	AGATAAGG	1947	8	+	Triticum aestivum
1317	Light	FcGSTU37	MRE	AACCTAA	46	7	-	Petroselinum crispum
1318	Light	FcGSTF2	MRE	AACCTAA	1591	7	+	Petroselinum crispum
1319	Light	FcGSTU38	MRE	AACCTAA	1156	7	+	Petroselinum crispum
1320	Light	FcGSTU40	MRE	AACCTAA	1155	7	+	Petroselinum crispum
1321	Light	FcGSTU22	MRE	AACCTAA	1593	7	+	Petroselinum crispum
1322	Light	FcGSTU24	MRE	AACCTAA	1534	7	+	Petroselinum crispum
1323	Light	FcGSTU25	MRE	AACCTAA	1569	7	+	Petroselinum crispum
1324	Light	FcGSTU26	MRE	AACCTAA	710	7	-	Petroselinum crispum
1325	Light	FcGSTU27	MRE	AACCTAA	829	7	+	Petroselinum crispum
1326	Light	FcGSTU30	MRE	AACCTAA	798	7	-	Petroselinum crispum
1327	Light	FcGSTU30	MRE	AACCTAA	1019	7	+	Petroselinum crispum
1328	Light	FcGSTU32	MRE	AACCTAA	131	7	+	Petroselinum crispum
1329	Light	FcGSTU35	MRE	AACCTAA	1589	7	+	Petroselinum crispum
1330	Light	FcGSTU14	MRE	AACCTAA	1378	7	-	Petroselinum crispum
1331	Light	FcGSTU17	MRE	AACCTAA	879	7	-	Petroselinum crispum
1332	Light	FcGSTU36	Sp1	GGGCGG	294	6	+	Oryza sativa
1333	Light	FcGSTU36	Sp1	GGGCGG	544	6	+	Oryza sativa
1334	Light	FcGSTL3	Sp1	GGGCGG	397	6	+	Oryza sativa
1335	Light	FcGSTL3	Sp1	GGGCGG	408	6	+	Oryza sativa
1336	Light	FcGSTU40	Sp1	GGGCGG	516	6	-	Oryza sativa
1337	Light	FcGSTU40	Sp1	GGGCGG	1035	6	-	Oryza sativa
1338	Light	FcGSTU7	Sp1	GGGCGG	1684	6	-	Oryza sativa
1339	Light	FcGSTU27	Sp1	GGGCGG	1077	6	+	Oryza sativa
1340	Light	FcGSTU10	Sp1	GGGCGG	145	6	+	Oryza sativa
1341	Light	FcGSTU11	Sp1	GGGCGG	40	6	-	Oryza sativa
1342	Light	FcGSTU11	Sp1	GGGCGG	207	6	+	Oryza sativa
1343	Light	FcGSTU11	Sp1	GGGCGG	258	6	+	Oryza sativa
1344	Light	FcGSTU3	Sp1	GGGCGG	360	6	-	Oryza sativa
1345	Light	FcGSTU36	TCCC-motif	TCTCCCT	1284	7	+	Spinacia oleracea
1346	Light	FcGSTL3	TCCC-motif	TCTCCCT	698	7	+	Spinacia oleracea
1347	Light	FcGSTL3	TCCC-motif	TCTCCCT	1197	7	+	Spinacia oleracea
1348	Light	FcGSTU7	TCCC-motif	TCTCCCT	545	7	+	Spinacia oleracea
1349	Light	FcGSTU7	TCCC-motif	TCTCCCT	580	7	+	Spinacia oleracea
1350	Light	FcGSTU23	TCCC-motif	TCTCCCT	1946	7	+	Spinacia oleracea
1351	Light	FcGSTU24	TCCC-motif	TCTCCCT	650	7	-	Spinacia oleracea
1352	Light	FcGSTU34	TCCC-motif	TCTCCCT	1522	7	-	Spinacia oleracea
1353	Light	FcGSTU35	TCCC-motif	TCTCCCT	231	7	-	Spinacia oleracea
1354	Light	FcGSTU10	TCCC-motif	TCTCCCT	464	7	+	Spinacia oleracea
1355	Light	FcGSTU11	TCCC-motif	TCTCCCT	457	7	+	Spinacia oleracea
1356	Light	FcGSTU11	TCCC-motif	TCTCCCT	1229	7	+	Spinacia oleracea
1357	Light	FcGSTU11	TCCC-motif	TCTCCCT	1399	7	+	Spinacia oleracea
1358	Light	FcGSTU12	TCCC-motif	TCTCCCT	450	7	+	Spinacia oleracea
1359	Light	FcGSTU16	TCCC-motif	TCTCCCT	447	7	+	Spinacia oleracea
1360	Light	FcGSTU17	TCCC-motif	TCTCCCT	1237	7	-	Spinacia oleracea
1361	Light	FcGSTU4	TCCC-motif	TCTCCCT	1312	7	+	Spinacia oleracea
1362	Light	FcGSTU18	TCCC-motif	TCTCCCT	354	7	-	Spinacia oleracea
1363	Light	FcGSTT1	TCCC-motif	TCTCCCT	795	7	+	Spinacia oleracea
1364	Light	FcGSTU36	TCT-motif	TCTTAC	806	6	-	Arabidopsis thaliana
1365	Light	FcGSTU36	TCT-motif	TCTTAC	1402	6	+	Arabidopsis thaliana
1366	Light	FcGSTU36	TCT-motif	TCTTAC	1584	6	-	Arabidopsis thaliana
1367	Light	FcGSTU37	TCT-motif	TCTTAC	646	6	+	Arabidopsis thaliana
1368	Light	FcGSTU8	TCT-motif	TCTTAC	968	6	+	Arabidopsis thaliana
1369	Light	FcGSTU8	TCT-motif	TCTTAC	1920	6	+	Arabidopsis thaliana
1370	Light	FcGSTF1	TCT-motif	TCTTAC	1002	6	+	Arabidopsis thaliana
1371	Light	FcGSTL2	TCT-motif	TCTTAC	387	6	-	Arabidopsis thaliana
1372	Light	FcGSTL1	TCT-motif	TCTTAC	1735	6	-	Arabidopsis thaliana
1373	Light	FcGSTU40	TCT-motif	TCTTAC	22	6	+	Arabidopsis thaliana
1374	Light	FcGSTU40	TCT-motif	TCTTAC	1695	6	+	Arabidopsis thaliana
1375	Light	FcGSTU42	TCT-motif	TCTTAC	691	6	+	Arabidopsis thaliana
1376	Light	FcGSTU42	TCT-motif	TCTTAC	1068	6	+	Arabidopsis thaliana
1377	Light	FcGSTU7	TCT-motif	TCTTAC	52	6	+	Arabidopsis thaliana
1378	Light	FcGSTU7	TCT-motif	TCTTAC	938	6	+	Arabidopsis thaliana
1379	Light	FcGSTU22	TCT-motif	TCTTAC	391	6	-	Arabidopsis thaliana
1380	Light	FcGSTU22	TCT-motif	TCTTAC	1889	6	+	Arabidopsis thaliana
1381	Light	FcGSTU24	TCT-motif	TCTTAC	1596	6	+	Arabidopsis thaliana
1382	Light	FcGSTU28	TCT-motif	TCTTAC	754	6	-	Arabidopsis thaliana
1383	Light	FcGSTU29	TCT-motif	TCTTAC	602	6	+	Arabidopsis thaliana
1384	Light	FcGSTU30	TCT-motif	TCTTAC	1216	6	+	Arabidopsis thaliana
1385	Light	FcGSTU32	TCT-motif	TCTTAC	779	6	-	Arabidopsis thaliana
1386	Light	FcGSTU34	TCT-motif	TCTTAC	1120	6	+	Arabidopsis thaliana
1387	Light	FcGSTU10	TCT-motif	TCTTAC	340	6	-	Arabidopsis thaliana
1388	Light	FcGSTU10	TCT-motif	TCTTAC	1934	6	-	Arabidopsis thaliana
1389	Light	FcGSTU11	TCT-motif	TCTTAC	333	6	-	Arabidopsis thaliana
1390	Light	FcGSTU11	TCT-motif	TCTTAC	1935	6	-	Arabidopsis thaliana
1391	Light	FcGSTU12	TCT-motif	TCTTAC	946	6	+	Arabidopsis thaliana
1392	Light	FcGSTU12	TCT-motif	TCTTAC	997	6	+	Arabidopsis thaliana
1393	Light	FcGSTU21	TCT-motif	TCTTAC	1323	6	+	Arabidopsis thaliana
1394	Light	FcGSTU18	TCT-motif	TCTTAC	106	6	+	Arabidopsis thaliana
1395	Light	FcGSTT1	TCT-motif	TCTTAC	492	6	-	Arabidopsis thaliana
1396	Light	FcGSTT1	TCT-motif	TCTTAC	1812	6	+	Arabidopsis thaliana
1397	Light	FcGSTU1	TCT-motif	TCTTAC	1091	6	+	Arabidopsis thaliana
1398	Light	FcGSTU9	TCT-motif	TCTTAC	21	6	-	Arabidopsis thaliana
1399	Light	FcGSTU9	TCT-motif	TCTTAC	991	6	+	Arabidopsis thaliana
1400	Light	FcGSTU36	LAMP-element	CTTTATCA	238	8	-	Pisum sativum
1401	Light	FcGSTU36	LAMP-element	CTTTATCA	488	8	-	Pisum sativum
1402	Light	FcGSTF2	LAMP-element	CTTTATCA	957	8	-	Pisum sativum
1403	Light	FcGSTL2	LAMP-element	CTTTATCA	1512	8	-	Pisum sativum
1404	Light	FcGSTU22	LAMP-element	CTTTATCA	1270	8	-	Pisum sativum
1405	Light	FcGSTU27	LAMP-element	CTTTATCA	727	8	+	Pisum sativum
1406	Light	FcGSTU28	LAMP-element	CTTTATCA	691	8	-	Pisum sativum
1407	Light	FcGSTU13	LAMP-element	CTTTATCA	1232	8	-	Pisum sativum
1408	Light	FcGSTU15	LAMP-element	CTTTATCA	1393	8	+	Pisum sativum
1409	Light	FcGSTU15	LAMP-element	CTTTATCA	1655	8	+	Pisum sativum
1410	Light	FcGSTU16	LAMP-element	CTTTATCA	815	8	+	Pisum sativum
1411	Light	FcGSTU2	LAMP-element	CTTTATCA	1598	8	+	Pisum sativum
1412	Light	FcGSTU36	ATC-motif	AGCTATCCA	876	9	+	Arabidopsis thaliana
1413	Light	FcGSTU42	ATC-motif	AGCTATCCA	257	9	-	Arabidopsis thaliana
1414	Light	FcGSTU6	ATC-motif	AGTAATCT	1548	8	-	Spinacia oleracea
1415	Light	FcGSTU33	ATC-motif	AGTAATCT	441	8	+	Spinacia oleracea
1416	Light	FcGSTU12	ATC-motif	AGCTATCCA	409	9	-	Arabidopsis thaliana
1417	Light	FcGSTU2	ATC-motif	TGCTATCCA	1497	9	+	Pisum sativum
1418	Light	FcGSTU2	ATC-motif	TGCTATCCA	1647	9	+	Pisum sativum
1419	Light	FcGSTU2	ATC-motif	TGCTATCCA	1715	9	+	Pisum sativum
1420	TF	FcGSTU36	W box	TTGACC	1787	6	+	Arabidopsis thaliana
1421	TF	FcGSTU36	W box	TTGACC	1850	6	-	Arabidopsis thaliana
1422	TF	FcGSTU37	W box	TTGACC	1880	6	+	Arabidopsis thaliana
1423	TF	FcGSTU37	W box	TTGACC	1943	6	-	Arabidopsis thaliana
1424	TF	FcGSTF3	W box	TTGACC	1285	6	-	Arabidopsis thaliana
1425	TF	FcGSTF6	W box	TTGACC	779	6	+	Arabidopsis thaliana
1426	TF	FcGSTF6	W box	TTGACC	815	6	+	Arabidopsis thaliana
1427	TF	FcGSTF6	W box	TTGACC	1221	6	+	Arabidopsis thaliana
1428	TF	FcGSTU20	W box	TTGACC	1709	6	-	Arabidopsis thaliana
1429	TF	FcGSTU38	W box	TTGACC	1290	6	-	Arabidopsis thaliana
1430	TF	FcGSTU38	W box	TTGACC	1899	6	-	Arabidopsis thaliana
1431	TF	FcGSTU39	W box	TTGACC	858	6	+	Arabidopsis thaliana
1432	TF	FcGSTU40	W box	TTGACC	1900	6	-	Arabidopsis thaliana
1433	TF	FcGSTU42	W box	TTGACC	1576	6	-	Arabidopsis thaliana
1434	TF	FcGSTU42	W box	TTGACC	1889	6	+	Arabidopsis thaliana
1435	TF	FcGSTU7	W box	TTGACC	986	6	+	Arabidopsis thaliana
1436	TF	FcGSTU22	W box	TTGACC	500	6	+	Arabidopsis thaliana
1437	TF	FcGSTU22	W box	TTGACC	509	6	-	Arabidopsis thaliana
1438	TF	FcGSTU22	W box	TTGACC	562	6	+	Arabidopsis thaliana
1439	TF	FcGSTU22	W box	TTGACC	593	6	-	Arabidopsis thaliana
1440	TF	FcGSTU22	W box	TTGACC	645	6	-	Arabidopsis thaliana
1441	TF	FcGSTU25	W box	TTGACC	494	6	+	Arabidopsis thaliana
1442	TF	FcGSTU25	W box	TTGACC	503	6	-	Arabidopsis thaliana
1443	TF	FcGSTU25	W box	TTGACC	556	6	+	Arabidopsis thaliana
1444	TF	FcGSTU25	W box	TTGACC	587	6	-	Arabidopsis thaliana
1445	TF	FcGSTU27	W box	TTGACC	130	6	-	Arabidopsis thaliana
1446	TF	FcGSTU27	W box	TTGACC	452	6	-	Arabidopsis thaliana
1447	TF	FcGSTU29	W box	TTGACC	1242	6	-	Arabidopsis thaliana
1448	TF	FcGSTU29	W box	TTGACC	1307	6	+	Arabidopsis thaliana
1449	TF	FcGSTU31	W box	TTGACC	459	6	-	Arabidopsis thaliana
1450	TF	FcGSTU32	W box	TTGACC	346	6	+	Arabidopsis thaliana
1451	TF	FcGSTU34	W box	TTGACC	873	6	-	Arabidopsis thaliana
1452	TF	FcGSTU10	W box	TTGACC	1295	6	+	Arabidopsis thaliana
1453	TF	FcGSTU11	W box	TTGACC	1288	6	+	Arabidopsis thaliana
1454	TF	FcGSTU12	W box	TTGACC	346	6	-	Arabidopsis thaliana
1455	TF	FcGSTU12	W box	TTGACC	1654	6	+	Arabidopsis thaliana
1456	TF	FcGSTU12	W box	TTGACC	1861	6	+	Arabidopsis thaliana
1457	TF	FcGSTU13	W box	TTGACC	1843	6	-	Arabidopsis thaliana
1458	TF	FcGSTU14	W box	TTGACC	1780	6	+	Arabidopsis thaliana
1459	TF	FcGSTU15	W box	TTGACC	1622	6	+	Arabidopsis thaliana
1460	TF	FcGSTU15	W box	TTGACC	1828	6	+	Arabidopsis thaliana
1461	TF	FcGSTU16	W box	TTGACC	1654	6	-	Arabidopsis thaliana
1462	TF	FcGSTU16	W box	TTGACC	1715	6	-	Arabidopsis thaliana
1463	TF	FcGSTU16	W box	TTGACC	1915	6	-	Arabidopsis thaliana
1464	TF	FcGSTU2	W box	TTGACC	408	6	-	Arabidopsis thaliana
1465	TF	FcGSTU3	W box	TTGACC	280	6	+	Arabidopsis thaliana
1466	TF	FcGSTU4	W box	TTGACC	533	6	-	Arabidopsis thaliana
1467	TF	FcGSTU21	W box	TTGACC	692	6	-	Arabidopsis thaliana
1468	TF	FcGSTU21	W box	TTGACC	1008	6	-	Arabidopsis thaliana
1469	TF	FcGSTT1	W box	TTGACC	1408	6	+	Arabidopsis thaliana
1470	TF	FcGSTU36	MYB	CAACAG	689	6	-	Arabidopsis thaliana
1471	TF	FcGSTU36	MYB	CAACAG	845	6	+	Arabidopsis thaliana
1472	TF	FcGSTU36	MYB	CAACCA	871	6	+	Arabidopsis thaliana
1473	TF	FcGSTU36	MYB	CAACAG	1010	6	+	Arabidopsis thaliana
1474	TF	FcGSTU36	Myb-binding site	CAACAG	689	6	-	Nicotiana tabacum
1475	TF	FcGSTU36	Myb-binding site	CAACAG	845	6	+	Nicotiana tabacum
1476	TF	FcGSTU36	Myb-binding site	CAACAG	1010	6	+	Nicotiana tabacum
1477	TF	FcGSTU36	Myb	TAACTG	1068	6	-	Arabidopsis thaliana
1478	TF	FcGSTU37	Myb	TAACTG	161	6	-	Arabidopsis thaliana
1479	TF	FcGSTU37	Myb	CAACTG	378	6	+	Arabidopsis thaliana
1480	TF	FcGSTU37	Myb	TAACTG	509	6	-	Arabidopsis thaliana
1481	TF	FcGSTU37	Myb	TAACTG	560	6	-	Arabidopsis thaliana
1482	TF	FcGSTU37	MYB	TAACCA	466	6	-	Arabidopsis thaliana
1483	TF	FcGSTU37	MYB	TAACCA	513	6	+	Arabidopsis thaliana
1484	TF	FcGSTU37	MYB	CAACCA	959	6	-	Arabidopsis thaliana
1485	TF	FcGSTU37	MYB-like sequence	TAACCA	466	6	-	Arabidopsis thaliana
1486	TF	FcGSTU37	MYB-like sequence	TAACCA	513	6	+	Arabidopsis thaliana
1487	TF	FcGSTU8	Myb	CAACTG	838	6	-	Arabidopsis thaliana
1488	TF	FcGSTU8	Myb	TAACTG	1157	6	-	Arabidopsis thaliana
1489	TF	FcGSTU8	MYB-like sequence	TAACCA	191	6	+	Arabidopsis thaliana
1490	TF	FcGSTU8	MYB-like sequence	TAACCA	249	6	+	Arabidopsis thaliana
1491	TF	FcGSTU8	MYB-like sequence	TAACCA	986	6	-	Arabidopsis thaliana
1492	TF	FcGSTU8	MYB-like sequence	TAACCA	1958	6	+	Arabidopsis thaliana
1493	TF	FcGSTU8	MYB	CAACCA	70	6	-	Arabidopsis thaliana
1494	TF	FcGSTU8	MYB	TAACCA	191	6	+	Arabidopsis thaliana
1495	TF	FcGSTU8	MYB	TAACCA	249	6	+	Arabidopsis thaliana
1496	TF	FcGSTU8	MYB	TAACCA	986	6	-	Arabidopsis thaliana
1497	TF	FcGSTU8	MYB	CAACCA	1422	6	-	Arabidopsis thaliana
1498	TF	FcGSTU8	MYB	TAACCA	1958	6	+	Arabidopsis thaliana
1499	TF	FcGSTF1	MYB	TAACCA	878	6	+	Arabidopsis thaliana
1500	TF	FcGSTF1	MYB	CAACCA	1538	6	+	Arabidopsis thaliana
1501	TF	FcGSTF1	MYB	CAACCA	1753	6	+	Arabidopsis thaliana
1502	TF	FcGSTF1	MYB-like sequence	TAACCA	878	6	+	Arabidopsis thaliana
1503	TF	FcGSTF1	Myb	TAACTG	947	6	-	Arabidopsis thaliana
1504	TF	FcGSTF2	MYB	CAACCA	213	6	-	Arabidopsis thaliana
1505	TF	FcGSTF2	MYB	CAACCA	345	6	-	Arabidopsis thaliana
1506	TF	FcGSTF2	MYB	CAACCA	460	6	+	Arabidopsis thaliana
1507	TF	FcGSTF2	MYB	TAACCA	720	6	-	Arabidopsis thaliana
1508	TF	FcGSTF2	MYB	CAACCA	945	6	-	Arabidopsis thaliana
1509	TF	FcGSTF2	MYB	CAACCA	1302	6	-	Arabidopsis thaliana
1510	TF	FcGSTF2	MYB	CAACCA	1476	6	-	Arabidopsis thaliana
1511	TF	FcGSTF2	MYB	TAACCA	1738	6	+	Arabidopsis thaliana
1512	TF	FcGSTF2	MYB-like sequence	TAACCA	720	6	-	Arabidopsis thaliana
1513	TF	FcGSTF2	MYB-like sequence	TAACCA	1738	6	+	Arabidopsis thaliana
1514	TF	FcGSTF2	Myb	CAACTG	258	6	+	Arabidopsis thaliana
1515	TF	FcGSTF2	Myb	CAACTG	650	6	+	Arabidopsis thaliana
1516	TF	FcGSTL3	Myb-binding site	CAACAG	1544	6	-	Nicotiana tabacum
1517	TF	FcGSTL3	Myb-binding site	CAACAG	2006	6	+	Nicotiana tabacum
1518	TF	FcGSTL3	MYB	TAACCA	151	6	+	Arabidopsis thaliana
1519	TF	FcGSTL3	MYB	CAACAG	1544	6	-	Arabidopsis thaliana
1520	TF	FcGSTL3	MYB	CAACAG	2006	6	+	Arabidopsis thaliana
1521	TF	FcGSTL3	MYB recognition site	CCGTTG	1481	6	+	Arabidopsis thaliana
1522	TF	FcGSTL3	Myb	TAACTG	1038	6	-	Arabidopsis thaliana
1523	TF	FcGSTL3	Myb	CAACTG	1757	6	-	Arabidopsis thaliana
1524	TF	FcGSTL3	MYB-like sequence	TAACCA	151	6	+	Arabidopsis thaliana
1525	TF	FcGSTF3	MYB-like sequence	TAACCA	521	6	+	Arabidopsis thaliana
1526	TF	FcGSTF3	MYB-like sequence	TAACCA	1891	6	-	Arabidopsis thaliana
1527	TF	FcGSTF3	MYB	TAACCA	521	6	+	Arabidopsis thaliana
1528	TF	FcGSTF3	MYB	CAACCA	1131	6	+	Arabidopsis thaliana
1529	TF	FcGSTF3	MYB	TAACCA	1891	6	-	Arabidopsis thaliana
1530	TF	FcGSTF3	MYB recognition site	CCGTTG	242	6	-	Arabidopsis thaliana
1531	TF	FcGSTF4	MYB	TAACCA	358	6	+	Arabidopsis thaliana
1532	TF	FcGSTF4	MYB	CAACCA	1122	6	+	Arabidopsis thaliana
1533	TF	FcGSTF4	MYB	CAACAG	1530	6	-	Arabidopsis thaliana
1534	TF	FcGSTF4	MYB	TAACCA	1890	6	-	Arabidopsis thaliana
1535	TF	FcGSTF4	MYB-like sequence	TAACCA	358	6	+	Arabidopsis thaliana
1536	TF	FcGSTF4	MYB-like sequence	TAACCA	1890	6	-	Arabidopsis thaliana
1537	TF	FcGSTF4	MYB recognition site	CCGTTG	74	6	-	Arabidopsis thaliana
1538	TF	FcGSTF4	Myb-binding site	CAACAG	1530	6	-	Nicotiana tabacum
1539	TF	FcGSTF5	MYB recognition site	CCGTTG	516	6	-	Arabidopsis thaliana
1540	TF	FcGSTF5	Myb	CAACTG	609	6	+	Arabidopsis thaliana
1541	TF	FcGSTF5	MYB	CAACCA	101	6	+	Arabidopsis thaliana
1542	TF	FcGSTF5	MYB	TAACCA	1416	6	+	Arabidopsis thaliana
1543	TF	FcGSTF5	MYB-like sequence	TAACCA	1416	6	+	Arabidopsis thaliana
1544	TF	FcGSTF6	MYB	CAACAG	84	6	-	Arabidopsis thaliana
1545	TF	FcGSTF6	MYB	CAACAG	1343	6	+	Arabidopsis thaliana
1546	TF	FcGSTF6	MYB	CAACCA	2009	6	+	Arabidopsis thaliana
1547	TF	FcGSTF6	Myb-binding site	CAACAG	84	6	-	Nicotiana tabacum
1548	TF	FcGSTF6	Myb-binding site	CAACAG	1343	6	+	Nicotiana tabacum
1549	TF	FcGSTF6	Myb	TAACTG	81	6	+	Arabidopsis thaliana
1550	TF	FcGSTU19	Myb	CAACTG	647	6	+	Arabidopsis thaliana
1551	TF	FcGSTU19	Myb	TAACTG	1299	6	+	Arabidopsis thaliana
1552	TF	FcGSTU19	MYB	TAACCA	830	6	-	Arabidopsis thaliana
1553	TF	FcGSTU19	MYB-like sequence	TAACCA	830	6	-	Arabidopsis thaliana
1554	TF	FcGSTU20	Myb	CAACTG	1771	6	-	Arabidopsis thaliana
1555	TF	FcGSTU20	MYB	TAACCA	597	6	+	Arabidopsis thaliana
1556	TF	FcGSTU20	MYB-like sequence	TAACCA	597	6	+	Arabidopsis thaliana
1557	TF	FcGSTL1	Myb	TAACTG	76	6	+	Arabidopsis thaliana
1558	TF	FcGSTL1	Myb	TAACTG	913	6	+	Arabidopsis thaliana
1559	TF	FcGSTL1	Myb	CAACTG	1267	6	-	Arabidopsis thaliana
1560	TF	FcGSTL1	Myb	CAACTG	1961	6	-	Arabidopsis thaliana
1561	TF	FcGSTL1	Myb-binding site	CAACAG	117	6	-	Nicotiana tabacum
1562	TF	FcGSTL1	Myb-binding site	CAACAG	220	6	-	Nicotiana tabacum
1563	TF	FcGSTL1	MYB	CAACAG	117	6	-	Arabidopsis thaliana
1564	TF	FcGSTL1	MYB	CAACAG	220	6	-	Arabidopsis thaliana
1565	TF	FcGSTL1	MYB	TAACCA	224	6	-	Arabidopsis thaliana
1566	TF	FcGSTL1	MYB	TAACCA	1000	6	+	Arabidopsis thaliana
1567	TF	FcGSTL1	MYB	TAACCA	1875	6	+	Arabidopsis thaliana
1568	TF	FcGSTL1	MYB-like sequence	TAACCA	224	6	-	Arabidopsis thaliana
1569	TF	FcGSTL1	MYB-like sequence	TAACCA	1000	6	+	Arabidopsis thaliana
1570	TF	FcGSTL1	MYB-like sequence	TAACCA	1875	6	+	Arabidopsis thaliana
1571	TF	FcEF1Bγ1	MYB	CAACCA	347	6	-	Arabidopsis thaliana
1572	TF	FcEF1Bγ1	MYB	CAACCA	493	6	+	Arabidopsis thaliana
1573	TF	FcEF1Bγ1	MYB	CAACCA	1965	6	-	Arabidopsis thaliana
1574	TF	FcGSTU38	MYB	CAACCA	1656	6	+	Arabidopsis thaliana
1575	TF	FcGSTU39	MYB-like sequence	TAACCA	1057	6	-	Arabidopsis thaliana
1576	TF	FcGSTU39	MYB-like sequence	TAACCA	1073	6	-	Arabidopsis thaliana
1577	TF	FcGSTU39	MYB	TAACCA	1057	6	-	Arabidopsis thaliana
1578	TF	FcGSTU39	MYB	TAACCA	1073	6	-	Arabidopsis thaliana
1579	TF	FcGSTU39	Myb	CAACTG	26	6	-	Arabidopsis thaliana
1580	TF	FcGSTU40	Myb	TAACTG	173	6	+	Arabidopsis thaliana
1581	TF	FcGSTU40	Myb	CAACTG	1045	6	-	Arabidopsis thaliana
1582	TF	FcGSTU40	MYB	CAACCA	1661	6	+	Arabidopsis thaliana
1583	TF	FcGSTU40	MYB	TAACCA	1758	6	-	Arabidopsis thaliana
1584	TF	FcGSTU40	MYB	CAACCA	1883	6	+	Arabidopsis thaliana
1585	TF	FcGSTU40	MYB-like sequence	TAACCA	1758	6	-	Arabidopsis thaliana
1586	TF	FcGSTU41	MYB	CAACCA	154	6	+	Arabidopsis thaliana
1587	TF	FcGSTU41	MYB	TAACCA	267	6	+	Arabidopsis thaliana
1588	TF	FcGSTU41	MYB	CAACCA	472	6	-	Arabidopsis thaliana
1589	TF	FcGSTU41	MYB	TAACCA	1905	6	+	Arabidopsis thaliana
1590	TF	FcGSTU41	MYB-like sequence	TAACCA	267	6	+	Arabidopsis thaliana
1591	TF	FcGSTU41	MYB-like sequence	TAACCA	1905	6	+	Arabidopsis thaliana
1592	TF	FcGSTU42	MYB recognition site	CCGTTG	624	6	-	Arabidopsis thaliana
1593	TF	FcGSTU42	MYB	CAACCA	130	6	+	Arabidopsis thaliana
1594	TF	FcGSTU42	MYB	TAACCA	604	6	+	Arabidopsis thaliana
1595	TF	FcGSTU42	MYB	CAACCA	1127	6	-	Arabidopsis thaliana
1596	TF	FcGSTU42	MYB	CAACCA	1905	6	+	Arabidopsis thaliana
1597	TF	FcGSTU42	MYB-like sequence	TAACCA	604	6	+	Arabidopsis thaliana
1598	TF	FcGSTU5	MYB	CAACAG	202	6	+	Arabidopsis thaliana
1599	TF	FcGSTU5	MYB	CAACAG	1891	6	-	Arabidopsis thaliana
1600	TF	FcGSTU5	Myb-binding site	CAACAG	202	6	+	Nicotiana tabacum
1601	TF	FcGSTU5	Myb-binding site	CAACAG	1891	6	-	Nicotiana tabacum
1602	TF	FcGSTU6	MYB	CAACAG	129	6	+	Arabidopsis thaliana
1603	TF	FcGSTU6	MYB	CAACAG	1900	6	-	Arabidopsis thaliana
1604	TF	FcGSTU6	Myb-binding site	CAACAG	129	6	+	Nicotiana tabacum
1605	TF	FcGSTU6	Myb-binding site	CAACAG	1900	6	-	Nicotiana tabacum
1606	TF	FcGSTU7	MYB	CAACAG	504	6	-	Arabidopsis thaliana
1607	TF	FcGSTU7	Myb-binding site	CAACAG	504	6	-	Nicotiana tabacum
1608	TF	FcGSTU7	Myb	CAACTG	176	6	-	Arabidopsis thaliana
1609	TF	FcGSTU7	Myb	TAACTG	328	6	-	Arabidopsis thaliana
1610	TF	FcGSTU7	Myb	CAACTG	368	6	-	Arabidopsis thaliana
1611	TF	FcGSTU7	Myb	TAACTG	907	6	+	Arabidopsis thaliana
1612	TF	FcGSTU7	Myb	CAACTG	1119	6	-	Arabidopsis thaliana
1613	TF	FcGSTU22	Myb	TAACTG	710	6	+	Arabidopsis thaliana
1614	TF	FcGSTU22	MYB-like sequence	TAACCA	753	6	+	Arabidopsis thaliana
1615	TF	FcGSTU22	MYB-like sequence	TAACCA	1597	6	+	Arabidopsis thaliana
1616	TF	FcGSTU22	MYB	CAACCA	330	6	+	Arabidopsis thaliana
1617	TF	FcGSTU22	MYB	TAACCA	753	6	+	Arabidopsis thaliana
1618	TF	FcGSTU22	MYB	CAACCA	1094	6	+	Arabidopsis thaliana
1619	TF	FcGSTU22	MYB	TAACCA	1597	6	+	Arabidopsis thaliana
1620	TF	FcGSTU23	MYB recognition site	CCGTTG	1351	6	-	Arabidopsis thaliana
1621	TF	FcGSTU24	MYB	TAACCA	51	6	+	Arabidopsis thaliana
1622	TF	FcGSTU24	MYB	TAACCA	88	6	+	Arabidopsis thaliana
1623	TF	FcGSTU24	MYB	TAACCA	120	6	+	Arabidopsis thaliana
1624	TF	FcGSTU24	MYB	TAACCA	171	6	+	Arabidopsis thaliana
1625	TF	FcGSTU24	MYB	TAACCA	191	6	+	Arabidopsis thaliana
1626	TF	FcGSTU24	MYB-like sequence	TAACCA	51	6	+	Arabidopsis thaliana
1627	TF	FcGSTU24	MYB-like sequence	TAACCA	88	6	+	Arabidopsis thaliana
1628	TF	FcGSTU24	MYB-like sequence	TAACCA	120	6	+	Arabidopsis thaliana
1629	TF	FcGSTU24	MYB-like sequence	TAACCA	171	6	+	Arabidopsis thaliana
1630	TF	FcGSTU24	MYB-like sequence	TAACCA	191	6	+	Arabidopsis thaliana
1631	TF	FcGSTU24	Myb	TAACTG	111	6	+	Arabidopsis thaliana
1632	TF	FcGSTU24	Myb	TAACTG	1121	6	-	Arabidopsis thaliana
1633	TF	FcGSTU25	MYB	CAACCA	140	6	-	Arabidopsis thaliana
1634	TF	FcGSTU25	MYB	CAACAG	711	6	+	Arabidopsis thaliana
1635	TF	FcGSTU25	MYB	TAACCA	747	6	+	Arabidopsis thaliana
1636	TF	FcGSTU25	MYB	CAACCA	1087	6	+	Arabidopsis thaliana
1637	TF	FcGSTU25	MYB	TAACCA	1573	6	+	Arabidopsis thaliana
1638	TF	FcGSTU25	MYB-like sequence	TAACCA	747	6	+	Arabidopsis thaliana
1639	TF	FcGSTU25	MYB-like sequence	TAACCA	1573	6	+	Arabidopsis thaliana
1640	TF	FcGSTU25	Myb	TAACTG	704	6	+	Arabidopsis thaliana
1641	TF	FcGSTU25	Myb-binding site	CAACAG	711	6	+	Nicotiana tabacum
1642	TF	FcGSTU26	MYB	CAACCA	1849	6	-	Arabidopsis thaliana
1643	TF	FcGSTU27	MYB	CAACAG	894	6	+	Arabidopsis thaliana
1644	TF	FcGSTU27	MYB	CAACAG	949	6	+	Arabidopsis thaliana
1645	TF	FcGSTU27	MYB	CAACAG	1337	6	+	Arabidopsis thaliana
1646	TF	FcGSTU27	Myb-binding site	CAACAG	894	6	+	Nicotiana tabacum
1647	TF	FcGSTU27	Myb-binding site	CAACAG	949	6	+	Nicotiana tabacum
1648	TF	FcGSTU27	Myb-binding site	CAACAG	1337	6	+	Nicotiana tabacum
1649	TF	FcGSTU27	Myb	CAACTG	1323	6	+	Arabidopsis thaliana
1650	TF	FcGSTU28	MYB	CAACAG	939	6	-	Arabidopsis thaliana
1651	TF	FcGSTU28	MYB	CAACCA	1171	6	-	Arabidopsis thaliana
1652	TF	FcGSTU28	MYB	CAACCA	1372	6	+	Arabidopsis thaliana
1653	TF	FcGSTU28	Myb-binding site	CAACAG	939	6	-	Nicotiana tabacum
1654	TF	FcGSTU28	Myb	CAACTG	1996	6	-	Arabidopsis thaliana
1655	TF	FcGSTU29	MYB	TAACCA	1227	6	-	Arabidopsis thaliana
1656	TF	FcGSTU29	MYB-like sequence	TAACCA	1227	6	-	Arabidopsis thaliana
1657	TF	FcGSTU30	MYB	CAACCA	1793	6	-	Arabidopsis thaliana
1658	TF	FcGSTU30	Myb	TAACTG	433	6	-	Arabidopsis thaliana
1659	TF	FcGSTU31	MYB	TAACCA	444	6	-	Arabidopsis thaliana
1660	TF	FcGSTU31	MYB	CAACAG	462	6	+	Arabidopsis thaliana
1661	TF	FcGSTU31	MYB	CAACAG	931	6	-	Arabidopsis thaliana
1662	TF	FcGSTU31	MYB	TAACCA	1125	6	+	Arabidopsis thaliana
1663	TF	FcGSTU31	MYB-like sequence	TAACCA	444	6	-	Arabidopsis thaliana
1664	TF	FcGSTU31	MYB-like sequence	TAACCA	1125	6	+	Arabidopsis thaliana
1665	TF	FcGSTU31	Myb	CAACTG	928	6	+	Arabidopsis thaliana
1666	TF	FcGSTU31	Myb-binding site	CAACAG	462	6	+	Nicotiana tabacum
1667	TF	FcGSTU31	Myb-binding site	CAACAG	931	6	-	Nicotiana tabacum
1668	TF	FcGSTU32	Myb-binding site	CAACAG	964	6	-	Nicotiana tabacum
1669	TF	FcGSTU32	MYB	CAACAG	964	6	-	Arabidopsis thaliana
1670	TF	FcGSTU32	MYB	CAACCA	1403	6	+	Arabidopsis thaliana
1671	TF	FcGSTU33	MYB	CAACAG	543	6	-	Arabidopsis thaliana
1672	TF	FcGSTU33	MYB	TAACCA	590	6	-	Arabidopsis thaliana
1673	TF	FcGSTU33	MYB	TAACCA	1829	6	-	Arabidopsis thaliana
1674	TF	FcGSTU33	MYB-like sequence	TAACCA	590	6	-	Arabidopsis thaliana
1675	TF	FcGSTU33	MYB-like sequence	TAACCA	1829	6	-	Arabidopsis thaliana
1676	TF	FcGSTU33	Myb-binding site	CAACAG	543	6	-	Nicotiana tabacum
1677	TF	FcGSTU34	Myb-binding site	CAACAG	1899	6	-	Nicotiana tabacum
1678	TF	FcGSTU34	Myb	CAACTG	1114	6	-	Arabidopsis thaliana
1679	TF	FcGSTU34	MYB-like sequence	TAACCA	347	6	+	Arabidopsis thaliana
1680	TF	FcGSTU34	MYB	TAACCA	347	6	+	Arabidopsis thaliana
1681	TF	FcGSTU34	MYB	CAACCA	1300	6	+	Arabidopsis thaliana
1682	TF	FcGSTU34	MYB	CAACAG	1899	6	-	Arabidopsis thaliana
1683	TF	FcGSTU35	MYB-like sequence	TAACCA	531	6	-	Arabidopsis thaliana
1684	TF	FcGSTU35	MYB	CAACAG	35	6	-	Arabidopsis thaliana
1685	TF	FcGSTU35	MYB	TAACCA	531	6	-	Arabidopsis thaliana
1686	TF	FcGSTU35	Myb-binding site	CAACAG	35	6	-	Nicotiana tabacum
1687	TF	FcGSTU35	Myb	TAACTG	704	6	+	Arabidopsis thaliana
1688	TF	FcGSTU35	Myb	TAACTG	1206	6	+	Arabidopsis thaliana
1689	TF	FcGSTU10	Myb	TAACTG	512	6	-	Arabidopsis thaliana
1690	TF	FcGSTU10	Myb-binding site	CAACAG	1668	6	+	Nicotiana tabacum
1691	TF	FcGSTU10	MYB	CAACCA	72	6	-	Arabidopsis thaliana
1692	TF	FcGSTU10	MYB	CAACCA	1623	6	+	Arabidopsis thaliana
1693	TF	FcGSTU10	MYB	CAACAG	1668	6	+	Arabidopsis thaliana
1694	TF	FcGSTU11	Myb	TAACTG	506	6	-	Arabidopsis thaliana
1695	TF	FcGSTU11	Myb	CAACTG	1045	6	+	Arabidopsis thaliana
1696	TF	FcGSTU11	Myb-binding site	CAACAG	1660	6	+	Nicotiana tabacum
1697	TF	FcGSTU11	MYB	CAACCA	100	6	-	Arabidopsis thaliana
1698	TF	FcGSTU11	MYB	CAACCA	1615	6	+	Arabidopsis thaliana
1699	TF	FcGSTU11	MYB	CAACAG	1660	6	+	Arabidopsis thaliana
1700	TF	FcGSTU11	MYB	TAACCA	1884	6	-	Arabidopsis thaliana
1701	TF	FcGSTU11	MYB-like sequence	TAACCA	1884	6	-	Arabidopsis thaliana
1702	TF	FcGSTU12	MYB	CAACAG	134	6	-	Arabidopsis thaliana
1703	TF	FcGSTU12	MYB recognition site	CCGTTG	394	6	+	Arabidopsis thaliana
1704	TF	FcGSTU12	Myb	CAACTG	1267	6	+	Arabidopsis thaliana
1705	TF	FcGSTU12	Myb-binding site	CAACAG	134	6	-	Nicotiana tabacum
1706	TF	FcGSTU13	MYB	TAACCA	860	6	-	Arabidopsis thaliana
1707	TF	FcGSTU13	MYB	CAACCA	1131	6	-	Arabidopsis thaliana
1708	TF	FcGSTU13	MYB	CAACCA	1475	6	-	Arabidopsis thaliana
1709	TF	FcGSTU13	MYB-like sequence	TAACCA	860	6	-	Arabidopsis thaliana
1710	TF	FcGSTU13	MYB recognition site	CCGTTG	477	6	+	Arabidopsis thaliana
1711	TF	FcGSTU14	Myb	TAACTG	966	6	-	Arabidopsis thaliana
1712	TF	FcGSTU14	Myb	CAACTG	1710	6	-	Arabidopsis thaliana
1713	TF	FcGSTU14	Myb-binding site	CAACAG	283	6	+	Nicotiana tabacum
1714	TF	FcGSTU14	MYB	CAACAG	283	6	+	Arabidopsis thaliana
1715	TF	FcGSTU14	MYB	TAACCA	647	6	-	Arabidopsis thaliana
1716	TF	FcGSTU14	MYB	CAACCA	840	6	+	Arabidopsis thaliana
1717	TF	FcGSTU14	MYB	TAACCA	1228	6	+	Arabidopsis thaliana
1718	TF	FcGSTU14	MYB	TAACCA	1345	6	-	Arabidopsis thaliana
1719	TF	FcGSTU14	MYB	TAACCA	1732	6	+	Arabidopsis thaliana
1720	TF	FcGSTU14	MYB-like sequence	TAACCA	647	6	-	Arabidopsis thaliana
1721	TF	FcGSTU14	MYB-like sequence	TAACCA	1228	6	+	Arabidopsis thaliana
1722	TF	FcGSTU14	MYB-like sequence	TAACCA	1345	6	-	Arabidopsis thaliana
1723	TF	FcGSTU14	MYB-like sequence	TAACCA	1732	6	+	Arabidopsis thaliana
1724	TF	FcGSTU15	Myb-binding site	CAACAG	413	6	+	Nicotiana tabacum
1725	TF	FcGSTU15	Myb-binding site	CAACAG	1836	6	+	Nicotiana tabacum
1726	TF	FcGSTU15	MYB	CAACAG	413	6	+	Arabidopsis thaliana
1727	TF	FcGSTU15	MYB	CAACCA	837	6	-	Arabidopsis thaliana
1728	TF	FcGSTU15	MYB	CAACAG	1836	6	+	Arabidopsis thaliana
1729	TF	FcGSTU16	Myb	CAACTG	909	6	-	Arabidopsis thaliana
1730	TF	FcGSTU16	Myb-binding site	CAACAG	415	6	+	Nicotiana tabacum
1731	TF	FcGSTU16	MYB	CAACAG	415	6	+	Arabidopsis thaliana
1732	TF	FcGSTU16	MYB	CAACCA	710	6	-	Arabidopsis thaliana
1733	TF	FcGSTU16	MYB	CAACCA	971	6	+	Arabidopsis thaliana
1734	TF	FcGSTU16	MYB	TAACCA	1043	6	+	Arabidopsis thaliana
1735	TF	FcGSTU16	MYB	CAACCA	1049	6	+	Arabidopsis thaliana
1736	TF	FcGSTU16	MYB	CAACCA	1229	6	-	Arabidopsis thaliana
1737	TF	FcGSTU16	MYB-like sequence	TAACCA	1043	6	+	Arabidopsis thaliana
1738	TF	FcGSTU17	MYB-like sequence	TAACCA	554	6	-	Arabidopsis thaliana
1739	TF	FcGSTU17	MYB-like sequence	TAACCA	1884	6	-	Arabidopsis thaliana
1740	TF	FcGSTU17	MYB	CAACAG	289	6	-	Arabidopsis thaliana
1741	TF	FcGSTU17	MYB	CAACAG	531	6	+	Arabidopsis thaliana
1742	TF	FcGSTU17	MYB	TAACCA	554	6	-	Arabidopsis thaliana
1743	TF	FcGSTU17	MYB	CAACCA	984	6	-	Arabidopsis thaliana
1744	TF	FcGSTU17	MYB	TAACCA	1884	6	-	Arabidopsis thaliana
1745	TF	FcGSTU17	Myb-binding site	CAACAG	289	6	-	Nicotiana tabacum
1746	TF	FcGSTU17	Myb-binding site	CAACAG	531	6	+	Nicotiana tabacum
1747	TF	FcGSTU17	Myb	TAACTG	441	6	-	Arabidopsis thaliana
1748	TF	FcGSTU17	Myb	CAACTG	1360	6	+	Arabidopsis thaliana
1749	TF	FcGSTU2	Myb	TAACTG	230	6	+	Arabidopsis thaliana
1750	TF	FcGSTU2	MYB recognition site	CCGTTG	816	6	-	Arabidopsis thaliana
1751	TF	FcGSTU2	MYB recognition site	CCGTTG	832	6	+	Arabidopsis thaliana
1752	TF	FcGSTU2	MYB-like sequence	TAACCA	207	6	+	Arabidopsis thaliana
1753	TF	FcGSTU2	MYB-like sequence	TAACCA	288	6	+	Arabidopsis thaliana
1754	TF	FcGSTU2	MYB-like sequence	TAACCA	398	6	+	Arabidopsis thaliana
1755	TF	FcGSTU2	MYB-like sequence	TAACCA	1762	6	+	Arabidopsis thaliana
1756	TF	FcGSTU2	MYB	TAACCA	207	6	+	Arabidopsis thaliana
1757	TF	FcGSTU2	MYB	CAACCA	211	6	+	Arabidopsis thaliana
1758	TF	FcGSTU2	MYB	TAACCA	288	6	+	Arabidopsis thaliana
1759	TF	FcGSTU2	MYB	TAACCA	398	6	+	Arabidopsis thaliana
1760	TF	FcGSTU2	MYB	TAACCA	1762	6	+	Arabidopsis thaliana
1761	TF	FcGSTU3	MYB	CAACCA	72	6	-	Arabidopsis thaliana
1762	TF	FcGSTU3	MYB	CAACAG	103	6	+	Arabidopsis thaliana
1763	TF	FcGSTU3	MYB	CAACCA	1151	6	-	Arabidopsis thaliana
1764	TF	FcGSTU3	MYB	CAACCA	1490	6	-	Arabidopsis thaliana
1765	TF	FcGSTU3	Myb	TAACTG	502	6	-	Arabidopsis thaliana
1766	TF	FcGSTU3	MYB recognition site	CCGTTG	364	6	+	Arabidopsis thaliana
1767	TF	FcGSTU3	MYB recognition site	CCGTTG	1692	6	-	Arabidopsis thaliana
1768	TF	FcGSTU3	MYB recognition site	CCGTTG	2007	6	-	Arabidopsis thaliana
1769	TF	FcGSTU3	Myb-binding site	CAACAG	103	6	+	Nicotiana tabacum
1770	TF	FcGSTU4	Myb	CAACTG	104	6	-	Arabidopsis thaliana
1771	TF	FcGSTU4	Myb	CAACTG	201	6	+	Arabidopsis thaliana
1772	TF	FcGSTU4	Myb	TAACTG	212	6	-	Arabidopsis thaliana
1773	TF	FcGSTU4	Myb	TAACTG	274	6	+	Arabidopsis thaliana
1774	TF	FcGSTU4	MYB-like sequence	TAACCA	145	6	-	Arabidopsis thaliana
1775	TF	FcGSTU4	MYB-like sequence	TAACCA	165	6	-	Arabidopsis thaliana
1776	TF	FcGSTU4	MYB	TAACCA	145	6	-	Arabidopsis thaliana
1777	TF	FcGSTU4	MYB	TAACCA	165	6	-	Arabidopsis thaliana
1778	TF	FcGSTU21	MYB recognition site	CCGTTG	1182	6	+	Arabidopsis thaliana
1779	TF	FcGSTU21	MYB	CAACCA	1145	6	+	Arabidopsis thaliana
1780	TF	FcGSTU18	Myb	CAACTG	1180	6	-	Arabidopsis thaliana
1781	TF	FcGSTU18	Myb	TAACTG	1536	6	-	Arabidopsis thaliana
1782	TF	FcGSTU18	MYB-like sequence	TAACCA	72	6	-	Arabidopsis thaliana
1783	TF	FcGSTU18	MYB-like sequence	TAACCA	738	6	+	Arabidopsis thaliana
1784	TF	FcGSTU18	MYB-like sequence	TAACCA	782	6	+	Arabidopsis thaliana
1785	TF	FcGSTU18	MYB-like sequence	TAACCA	1702	6	+	Arabidopsis thaliana
1786	TF	FcGSTU18	MYB	TAACCA	72	6	-	Arabidopsis thaliana
1787	TF	FcGSTU18	MYB	TAACCA	738	6	+	Arabidopsis thaliana
1788	TF	FcGSTU18	MYB	TAACCA	782	6	+	Arabidopsis thaliana
1789	TF	FcGSTU18	MYB	TAACCA	1702	6	+	Arabidopsis thaliana
1790	TF	FcGSTT1	Myb-binding site	CAACAG	1417	6	-	Nicotiana tabacum
1791	TF	FcGSTT1	Myb	TAACTG	31	6	+	Arabidopsis thaliana
1792	TF	FcGSTT1	MYB	CAACAG	1417	6	-	Arabidopsis thaliana
1793	TF	FcGSTU1	Myb-binding site	CAACAG	1538	6	-	Nicotiana tabacum
1794	TF	FcGSTU1	MYB-like sequence	TAACCA	1300	6	+	Arabidopsis thaliana
1795	TF	FcGSTU1	MYB	TAACCA	1300	6	+	Arabidopsis thaliana
1796	TF	FcGSTU1	MYB	CAACAG	1538	6	-	Arabidopsis thaliana
1797	TF	FcGSTU9	MYB	TAACCA	1350	6	+	Arabidopsis thaliana
1798	TF	FcGSTU9	MYB-like sequence	TAACCA	1350	6	+	Arabidopsis thaliana
