# Supplementary material for: Genome-wide in silico identification of glutathione S-transferase (GST) gene family members in fig (Ficus carica L.) and expression characteristics during fruit color development
Source: PeerJ. 2023 Jan 25;11:e14406. doi: 10.7717/peerj.14406 (PMC9884035; doi:10.7717/peerj.14406)
Supplement: Data S12 [file peerj-11-14406-s012.xls]

## Sheet: Data S12
Biological repetition 1	Weight	OD_530	OD_620	OD_650	Anthocyanin Content		Orphan_30	7.81733	8.44943	7.46827	13.2659	11.2699	8.39899	8.36295	11.277	7.17875
Orphan_30	0.5067	0.201	0.162	0.186	7.81733		Orphan_60	8.15129	7.12834	9.08333	11.245	8.17893	13.766	9.10506	8.17597	8.56301
Orphan_30	0.5085	0.198	0.158	0.161	8.44943		Orphan_70	9.86606	6.95319	8.0896	12.4467	8.14435	7.94713	9.44417	8.11366	11.5183
Orphan_30	0.5014	0.189	0.153	0.167	7.46827		Bojihong_30	7.14551	11.7944	12.3596	6.70177	7.35802	7.9463	9.25624	7.55913	9.09237
Orphan_60	0.5032	0.221	0.182	0.193	8.15129		Bojihong_60	9.44635	11.3512	8.82672	7.01559	11.139	10.2229	12.5237	9.20377	8.84638
Orphan_60	0.4995	0.185	0.151	0.162	7.12834		Bojihong_70	165.117	166.672	178.249	192.668	162.533	158.377	159.566	166.561	193.081
Orphan_60	0.5028	0.211	0.168	0.176	9.08333
Orphan_70	0.5024	0.214	0.167	0.179	9.86606
Orphan_70	0.5043	0.202	0.169	0.175	6.95319		Treatment	average	0.05	SE
Orphan_70	0.5057	0.204	0.165	0.177	8.0896		Orphan_30	9.276	b	2.1207
Bojihong_30	0.4983	0.205	0.171	0.182	7.14551		Orphan_60	9.266	b	2.028
Bojihong_30	0.5111	0.213	0.156	0.169	11.7944		Orphan_70	9.169	b	1.82194
Bojihong_30	0.514	0.221	0.161	0.174	12.3596		Bojihong_30	8.801	b	2.04385
Bojihong_60	0.5041	0.204	0.158	0.178	9.44635		Bojihong_60	9.842	b	1.65344
Bojihong_60	0.5015	0.211	0.157	0.171	11.3512		Bojihong_70	171.425	a	13.4296
Bojihong_60	0.4978	0.189	0.147	0.161	8.82672
Bojihong_70	0.4984	0.976	0.211	0.257	165.117
Bojihong_70	0.5094	1.024	0.236	0.271	166.672			30	60	70
Bojihong_70	0.5074	1.061	0.221	0.264	178.249		Orphan	9.276	9.266	9.169
							Bojihong	8.801	9.842	171.425
Biological repetition 2	Weight	OD_530	OD_620	OD_650	Anthocyanin Content			b	b	b
Orphan_30	0.5107	0.219	0.153	0.187	13.2659			b	b	a
Orphan_30	0.5032	0.198	0.142	0.178	11.2699			2.1207	2.028	1.82194
Orphan_30	0.5064	0.215	0.175	0.182	8.39899			2.04385	1.65344	13.4296
Orphan_60	0.5072	0.228	0.175	0.178	11.245
Orphan_60	0.5015	0.201	0.161	0.182	8.17893
Orphan_60	0.5118	0.233	0.167	0.176	13.766
Orphan_70	0.5104	0.231	0.171	0.184	12.4467
Orphan_70	0.5023	0.215	0.176	0.188	8.14435
Orphan_70	0.4957	0.196	0.157	0.183	7.94713
Bojihong_30	0.5103	0.204	0.171	0.185	6.70177
Bojihong_30	0.5045	0.198	0.162	0.179	7.35802
Bojihong_30	0.5012	0.192	0.154	0.166	7.9463
Bojihong_60	0.5029	0.192	0.158	0.172	7.01559
Bojihong_60	0.513	0.228	0.173	0.195	11.139
Bojihong_60	0.5018	0.21	0.161	0.177	10.2229
Bojihong_70	0.5024	1.134	0.236	0.272	192.668
Bojihong_70	0.4974	0.972	0.221	0.261	162.533
Bojihong_70	0.5082	0.961	0.215	0.238	158.377
Biological repetition 3	Weight	OD_530	OD_620	OD_650	Anthocyanin Content
Orphan_30	0.5047	0.214	0.174	0.184	8.36295
Orphan_30	0.5096	0.208	0.153	0.172	11.277
Orphan_30	0.4975	0.192	0.158	0.168	7.17875
Orphan_60	0.5016	0.194	0.149	0.177	9.10506
Orphan_60	0.5083	0.196	0.156	0.172	8.17597
Orphan_60	0.4967	0.186	0.145	0.162	8.56301
Orphan_70	0.5088	0.204	0.158	0.174	9.44417
Orphan_70	0.5042	0.198	0.159	0.171	8.11366
Orphan_70	0.5102	0.216	0.16	0.177	11.5183
Bojihong_30	0.5051	0.214	0.17	0.178	9.25624
Bojihong_30	0.5011	0.198	0.162	0.172	7.55913
Bojihong_30	0.5023	0.211	0.168	0.176	9.09237
Bojihong_60	0.5064	0.214	0.168	0.042	12.5237
Bojihong_60	0.5021	0.202	0.158	0.171	9.20377
Bojihong_60	0.4918	0.206	0.165	0.173	8.84638
Bojihong_70	0.5076	0.982	0.229	0.275	159.566
Bojihong_70	0.5061	1.006	0.223	0.264	166.561
Bojihong_70	0.4946	1.081	0.192	0.258	193.081
