# Supplementary material for: Genome-wide in silico identification of glutathione S-transferase (GST) gene family members in fig (Ficus carica L.) and expression characteristics during fruit color development
Source: PeerJ. 2023 Jan 25;11:e14406. doi: 10.7717/peerj.14406 (PMC9884035; doi:10.7717/peerj.14406)
Supplement: Data S13 [file peerj-11-14406-s013.xls]

## Sheet: Data S13
Biological repetition 1	Actin			FcGSTF1				Actin average	△Ct				Actin average	△△Ct								FcGSTF1
Orphan_30	17.7969	17.7392	17.7128	26.4576	26.2396	26.2164		17.7497	8.70791	8.48991	8.46679		8.55487	0.153035	-0.0649563	-0.0880791		0.899356	1.04605	1.06295		Orphan_30	0.899356	1.04605	1.06295	0.904845	1.04909	1.05344	1.05629	1.04688	0.904318
Orphan_60	17.1877	17.1269	17.0985	25.3598	25.3997	25.2097		17.1377	8.22215	8.26203	8.07204			-0.33272	-0.292838	-0.482827		1.25939	1.22505	1.39748		Orphan_60	1.25939	1.22505	1.39748	0.941863	1.02511	1.05259	1.38729	1.36157	1.34263
Orphan_70	17.6844	17.6059	17.6046	25.7819	25.8314	25.3528		17.6317	8.15025	8.19973	7.72114			-0.404624	-0.355142	-0.83373		1.32374	1.27911	1.78229		Orphan_70	1.32374	1.27911	1.78229	1.49065	1.28289	1.80037	1.82937	1.42037	1.93719
Bojihong_30	17.0322	16.992	16.9373	24.9386	24.8799	24.9779		16.9872	7.95138	7.89271	7.99077			-0.603487	-0.662163	-0.564105		1.51938	1.58245	1.47847		Bojihong_30	1.51938	1.58245	1.47847	1.20572	1.36053	1.25922	1.38831	1.24732	1.49552
Bojihong_60	17.3071	17.3415	17.1687	23.3442	23.3396	23.4568		17.2725	6.07172	6.06717	6.1843			-2.48315	-2.4877	-2.37057		5.59115	5.60882	5.17146		Bojihong_60	5.59115	5.60882	5.17146	5.65892	5.62628	5.77708	5.41261	5.54773	5.87409
Bojihong_70	17.0925	17.0649	16.9986	21.5789	21.6183	21.6105		17.052	4.52687	4.56634	4.55855			-4.028	-3.98853	-3.99632		16.3135	15.8733	15.9593		Bojihong_70	16.3135	15.8733	15.9593	16.0213	16.4319	15.6536	16.4235	16.0955	16.8692
Biological repetition 2	Actin			FcGSTF1																			30	60	70
Orphan_30	18.0612	18.0006	18.0438	28.425	28.2116	28.2056		18.0352	10.3898	10.1764	10.1704		10.2455	0.144257	-0.0691419	-0.0751148		0.904845	1.04909	1.05344		Orphan	1.002	1.222	1.571
Orphan_60	16.6586	16.5371	16.6143	26.9353	26.8131	26.7749		16.6033	10.3319	10.2097	10.1716			0.0864108	-0.0357719	-0.0739381		0.941863	1.02511	1.05259		Bojihong	1.394	5.586	16.181
Orphan_70	16.8713	16.7701	16.7653	26.4718	26.6883	26.1994		16.8022	9.66957	9.88611	9.39722			-0.575945	-0.359399	-0.848296		1.49065	1.28289	1.80037			0.0749961	0.173023	0.263767
Bojihong_30	16.1471	16.0674	16.1203	26.0872	25.913	26.0246		16.1116	9.97562	9.80135	9.91298			-0.269896	-0.444166	-0.33253		1.20572	1.36053	1.25922			0.134607	0.203213	0.365337
Bojihong_60	16.3934	16.4246	16.2948	24.1159	24.1242	24.0861		16.3709	7.74499	7.75333	7.71517			-2.50053	-2.49218	-2.53034		5.65892	5.62628	5.77708			e	d	c
Bojihong_70	16.1477	16.1039	15.9779	22.3201	22.2836	22.3536		16.0765	6.24359	6.20709	6.27709			-4.00192	-4.03842	-3.96842		16.0213	16.4319	15.6536			cd	b	a
Biological repetition 3	Actin			FcGSTF1
Orphan_30	17.8521	17.8064	17.7611	23.4134	23.4263	23.6375		17.8066	5.6068	5.61972	5.83091		5.68581	-0.0790093	-0.0660892	0.145099		1.05629	1.04688	0.904318
Orphan_60	17.3208	17.2088	17.1689	22.4464	22.4734	22.4936		17.2328	5.21354	5.24054	5.26075			-0.472272	-0.445268	-0.425064		1.38729	1.36157	1.34263
Orphan_70	17.715	17.6186	17.6393	22.4721	22.8372	22.3895		17.6576	4.81446	5.17954	4.73185			-0.871349	-0.506271	-0.953963		1.82937	1.42037	1.93719
Bojihong_30	17.0724	16.975	16.9482	22.211	22.3655	22.1037		16.9985	5.21248	5.36698	5.10516			-0.473331	-0.318828	-0.580649		1.38831	1.24732	1.49552
Bojihong_60	17.353	17.3627	17.2136	20.5592	20.5236	20.4412		17.3097	3.24949	3.21391	3.13145			-2.43632	-2.4719	-2.55437		5.41261	5.54773	5.87409
Bojihong_70	17.1216	17.0317	16.9578	18.6852	18.7143	18.6465		17.037	1.64812	1.67722	1.60949			-4.03769	-4.00859	-4.07632		16.4235	16.0955	16.8692
Biological repetition 1	Actin			FcGSTU5				Actin average	△Ct				Actin average	△△Ct								FcGSTU5
Orphan_30	17.7969	17.7392	17.7128	23.9734	23.9763	24.0875		17.7497	6.22371	6.22663	6.33782		6.26272	-0.0390093	-0.0360892	0.0750985		1.02741	1.02533	0.949277		Orphan_30	1.02741	1.02533	0.949277	0.889649	1.04635	1.07425	1.05207	0.991504	0.958652
Orphan_60	17.1877	17.1269	17.0985	22.9464	23.0734	23.1236		17.1377	5.80869	5.9357	5.9859			-0.454022	-0.327018	-0.276813		1.36985	1.25442	1.21152		Orphan_60	1.36985	1.25442	1.21152	0.932067	0.944922	1.00783	1.29893	1.14862	1.24505
Orphan_70	17.6844	17.6059	17.6046	23.4721	23.2272	23.1895		17.6317	5.84042	5.5955	5.55781			-0.422297	-0.667219	-0.704911		1.34006	1.58801	1.63004		Orphan_70	1.34006	1.58801	1.63004	1.0563	1.11027	1.20368	1.46772	1.42133	1.28914
Bojihong_30	17.0322	16.992	16.9373	23.111	23.1655	23.1037		16.9872	6.12383	6.17833	6.11651			-0.138885	-0.0843826	-0.146204		1.10105	1.06023	1.10665		Bojihong_30	1.10105	1.06023	1.10665	0.93281	0.836398	0.944693	1.09503	1.14177	1.07968
Bojihong_60	17.3071	17.3415	17.1687	23.4292	23.3536	23.5412		17.2725	6.15676	6.08118	6.26871			-0.105962	-0.181535	0.00599754		1.07621	1.13409	0.995851		Bojihong_60	1.07621	1.13409	0.995851	0.893597	0.814822	0.887532	0.942842	0.986325	0.893324
Bojihong_70	17.0925	17.0649	16.9986	21.8952	21.8643	22.0365		17.052	4.84317	4.81228	4.98454			-1.41954	-1.45044	-1.27818		2.67501	2.73291	2.42532		Bojihong_70	2.67501	2.73291	2.42532	2.62473	2.60652	2.88767	2.95278	3.0333	2.67963
Biological repetition 2	Actin			FcGSTU5
Orphan_30	18.0612	18.0006	18.0438	23.3336	23.0995	23.0616		18.0352	5.29837	5.06432	5.02635		5.12968	0.168692	-0.0653588	-0.103333		0.889649	1.04635	1.07425			30	60	70
Orphan_60	16.6586	16.5371	16.6143	21.8345	21.8148	21.7218		16.6033	5.23117	5.21141	5.11842			0.101494	0.081733	-0.011257		0.932067	0.944922	1.00783		Orphan	1.002	1.157	1.346
Orphan_70	16.8713	16.7701	16.7653	21.8529	21.781	21.6644		16.8022	5.05066	4.97877	4.86223			-0.0790203	-0.15091	-0.267446		1.0563	1.11027	1.20368		Bojihong	1.033	0.958	2.736
Bojihong_30	16.1471	16.0674	16.1203	21.3416	21.499	21.3234		16.1116	5.23003	5.38742	5.21176			0.100345	0.257739	0.0820833		0.93281	0.836398	0.944693			0.0594498	0.159514	0.200858
Bojihong_60	16.3934	16.4246	16.2948	21.6629	21.796	21.6727		16.3709	5.29198	5.42512	5.30181			0.162303	0.295444	0.172128		0.893597	0.814822	0.887532			0.103165	0.100773	0.190708
Bojihong_70	16.1477	16.1039	15.9779	19.814	19.8241	19.6763		16.0765	3.73751	3.74755	3.59978			-1.39217	-1.38213	-1.5299		2.62473	2.60652	2.88767			d	c	b
																							cd	d	a
Biological repetition 3	Actin			FcGSTU5
Orphan_30	17.8521	17.8064	17.7611	25.6762	25.7617	25.8104		17.8066	7.86964	7.95518	8.0038		7.94287	-0.0732312	0.0123096	0.0609216		1.05207	0.991504	0.958652
Orphan_60	17.3208	17.2088	17.1689	24.7984	24.9758	24.8595		17.2328	7.56555	7.74297	7.62667			-0.377325	-0.199906	-0.316202		1.29893	1.14862	1.24505
Orphan_70	17.715	17.6186	17.6393	25.0469	25.0933	25.2341		17.6576	7.3893	7.43564	7.57646			-0.553575	-0.507237	-0.366412		1.46772	1.42133	1.28914
Bojihong_30	17.0724	16.975	16.9482	24.8104	24.7501	24.8308		16.9985	7.8119	7.7516	7.83227			-0.130973	-0.191272	-0.110603		1.09503	1.14177	1.07968
Bojihong_60	17.353	17.3627	17.2136	25.3375	25.2725	25.4153		17.3097	8.02778	7.96274	8.10562			0.0849114	0.0198651	0.162745		0.942842	0.986325	0.893324
Bojihong_70	17.1216	17.0317	16.9578	23.4178	23.379	23.5579		17.037	6.3808	6.34198	6.52084			-1.56208	-1.60089	-1.42203		2.95278	3.0333	2.67963
Biological repetition 1	Actin			FcGSTU6				Actin average	△Ct				Actin average	△△Ct								FcGSTU6
Orphan_30	17.7969	17.7392	17.7128	27.9126	27.8116	27.7284		17.7497	10.163	10.0619	9.97877		10.0679	0.0950839	-0.00597318	-0.0891107		0.936218	1.00415	1.06371		Orphan_30	0.936218	1.00415	1.06371	0.959097	1.06088	0.982817	1.03264	1.04021	0.930952
Orphan_60	17.1877	17.1269	17.0985	26.925	27.0484	26.9868		17.1377	9.78734	9.91071	9.84911			-0.28054	-0.157173	-0.218771		1.21465	1.1151	1.16374		Orphan_60	1.21465	1.1151	1.16374	1.32462	1.27347	1.44698	1.08289	1.13486	1.16877
Orphan_70	17.6844	17.6059	17.6046	27.4955	27.3106	27.535		17.6317	9.8638	9.67898	9.90337			-0.204083	-0.388896	-0.164509		1.15195	1.30939	1.12078		Orphan_70	1.15195	1.30939	1.12078	1.37001	1.39796	1.23627	1.31948	1.16375	1.32729
Bojihong_30	17.0322	16.992	16.9373	26.8581	26.6916	26.8915		16.9872	9.8709	9.70439	9.90434			-0.196978	-0.363492	-0.163542		1.14629	1.28654	1.12003		Bojihong_30	1.14629	1.28654	1.12003	1.26862	1.10291	1.09817	1.31711	1.15391	1.20569
Bojihong_60	17.3071	17.3415	17.1687	26.6135	26.522	26.5972		17.2725	9.34108	9.2495	9.32478			-0.726798	-0.818376	-0.743103		1.65496	1.76342	1.67377		Bojihong_60	1.65496	1.76342	1.67377	1.47226	1.52645	1.61483	1.45612	1.61263	1.36385
Bojihong_70	17.0925	17.0649	16.9986	25.132	25.116	25.0621		17.052	8.08	8.06399	8.01014			-1.98788	-2.00389	-2.05774		3.96655	4.0108	4.16335		Bojihong_70	3.96655	4.0108	4.16335	3.74935	4.01333	3.95526	3.61591	3.51019	3.82932
Biological repetition 2	Actin			FcGSTU6
Orphan_30	18.0612	18.0006	18.0438	25.5138	25.3683	25.4786		18.0352	7.47858	7.33308	7.44334		7.41833	0.0602512	-0.0852566	0.0250053		0.959097	1.06088	0.982817			30	60	70
Orphan_60	16.6586	16.5371	16.6143	23.6161	23.6729	23.4886		16.6033	7.01276	7.06956	6.88529			-0.405578	-0.34877	-0.533048		1.32462	1.27347	1.44698		Orphan	1	1.212	1.267
Orphan_70	16.8713	16.7701	16.7653	23.7664	23.7372	23.9146		16.8022	6.96415	6.93501	7.11234			-0.454184	-0.483328	-0.30599		1.37001	1.39796	1.23627		Bojihong	1.19	1.569	3.869
Bojihong_30	16.1471	16.0674	16.1203	23.1867	23.3886	23.3948		16.1116	7.07508	7.27702	7.28323			-0.343255	-0.141312	-0.1351		1.26862	1.10291	1.09817			0.051547	0.116114	0.101343
Bojihong_60	16.3934	16.4246	16.2948	23.2312	23.1791	23.0978		16.3709	6.86031	6.80815	6.72695			-0.558028	-0.61018	-0.691385		1.47226	1.52645	1.61483			0.0836779	0.125567	0.210125
Bojihong_70	16.1477	16.1039	15.9779	21.5882	21.49	21.5111		16.0765	5.51169	5.41353	5.43456			-1.90664	-2.0048	-1.98377		3.74935	4.01333	3.95526			d	c	c
																							c	b	a
Biological repetition 3	Actin			FcGSTU6
Orphan_30	17.8521	17.8064	17.7611	25.2423	25.2318	25.3919		17.8066	7.43575	7.42521	7.58531		7.48209	-0.0463394	-0.0568813	0.103221		1.03264	1.04021	0.930952
Orphan_60	17.3208	17.2088	17.1689	24.6001	24.5324	24.49		17.2328	7.3672	7.29957	7.2571			-0.114887	-0.182521	-0.224988		1.08289	1.13486	1.16877
Orphan_70	17.715	17.6186	17.6393	24.7397	24.9209	24.7312		17.6576	7.08212	7.26331	7.07361			-0.399966	-0.21878	-0.408483		1.31948	1.16375	1.32729
Bojihong_30	17.0724	16.975	16.9482	24.0832	24.2741	24.2108		16.9985	7.08471	7.27556	7.21223			-0.397376	-0.206532	-0.269857		1.31711	1.15391	1.20569
Bojihong_60	17.353	17.3627	17.2136	24.2497	24.1024	24.3441		17.3097	6.93997	6.79268	7.0344			-0.542124	-0.689413	-0.447686		1.45612	1.61263	1.36385
Bojihong_70	17.1216	17.0317	16.9578	22.6648	22.7076	22.582		17.037	5.62773	5.67054	5.545			-1.85436	-1.81155	-1.93709		3.61591	3.51019	3.82932
Biological repetition 1	Actin			FcGSTU7				Actin average	△Ct				Actin average	△△Ct								FcGSTU7
Orphan_30	17.7969	17.7392	17.7128	24.0329	24.0025	24.1721		17.7497	6.28323	6.25287	6.42243		6.31951	-0.0362816	-0.0666428	0.102924		1.02547	1.04728	0.931144		Orphan_30	1.02547	1.04728	0.931144	0.926469	1.0116	1.067	0.94203	0.955432	1.11106
Orphan_60	17.1877	17.1269	17.0985	23.1971	23.2665	23.082		17.1377	6.05942	6.12877	5.94434			-0.260092	-0.190735	-0.375172		1.19756	1.14135	1.29699		Orphan_60	1.19756	1.14135	1.29699	1.04724	1.13093	1.28089	1.0849	1.19735	1.26811
Orphan_70	17.6844	17.6059	17.6046	23.7619	23.8983	23.7766		17.6317	6.13026	6.26662	6.14494			-0.189246	-0.0528888	-0.174564		1.14017	1.03734	1.12862		Orphan_70	1.14017	1.03734	1.12862	1.17295	1.117	1.29663	1.42678	1.39681	1.24047
Bojihong_30	17.0322	16.992	16.9373	23.5907	23.6679	23.5427		16.9872	6.60352	6.68072	6.55549			0.284015	0.361212	0.23598		0.821302	0.77851	0.849108		Bojihong_30	0.821302	0.77851	0.849108	0.730705	0.71772	0.678611	0.843542	0.980194	0.862009
Bojihong_60	17.3071	17.3415	17.1687	24.3979	24.3727	24.3761		17.2725	7.12545	7.10028	7.10365			0.805938	0.780774	0.784146		0.57199	0.582054	0.580696		Bojihong_60	0.57199	0.582054	0.580696	0.722542	0.689513	0.773974	0.647557	0.704603	0.708339
Bojihong_70	17.0925	17.0649	16.9986	20.6169	20.7021	20.6306		17.052	3.56489	3.65007	3.57861			-2.75462	-2.66944	-2.74089		6.74874	6.36182	6.68484		Bojihong_70	6.74874	6.36182	6.68484	7.06008	7.11864	6.96369	6.43516	6.43312	6.42674
Biological repetition 2	Actin			FcGSTU7
Orphan_30	18.0612	18.0006	18.0438	26.2928	26.166	26.0891		18.0352	8.2576	8.13079	8.05386		8.14742	0.110186	-0.0166321	-0.0935535		0.926469	1.0116	1.067			30	60	70
Orphan_60	16.6586	16.5371	16.6143	24.6842	24.5732	24.3936		16.6033	8.08082	7.96991	7.79027			-0.0665933	-0.177511	-0.35715		1.04724	1.13093	1.28089		Orphan	1.003	1.183	1.219
Orphan_70	16.8713	16.7701	16.7653	24.7195	24.79	24.5749		16.8022	7.91728	7.98778	7.77265			-0.230139	-0.159634	-0.37477		1.17295	1.117	1.29663		Bojihong	0.807	0.663	6.692
Bojihong_30	16.1471	16.0674	16.1203	24.7117	24.7375	24.8184		16.1116	8.60006	8.62592	8.70676			0.452639	0.478507	0.559344		0.730705	0.71772	0.678611			0.0664275	0.0885582	0.132836
Bojihong_60	16.3934	16.4246	16.2948	24.9872	25.0547	24.888		16.3709	8.61626	8.68377	8.51706			0.468847	0.53635	0.369643		0.722542	0.689513	0.773974			0.0918029	0.0726075	0.29727
Bojihong_70	16.1477	16.1039	15.9779	21.4042	21.3923	21.4241		16.0765	5.32773	5.31582	5.34757			-2.81968	-2.8316	-2.79985		7.06008	7.11864	6.96369			c	b	b
																							d	e	a
Biological repetition 3	Actin			FcGSTU7
Orphan_30	17.8521	17.8064	17.7611	25.2353	25.2149	24.9972		17.8066	7.42875	7.40837	7.19066		7.34259	0.0861556	0.0657756	-0.151931		0.94203	0.955432	1.11106
Orphan_60	17.3208	17.2088	17.1689	24.4579	24.3156	24.2328		17.2328	7.22503	7.08275	6.9999			-0.117559	-0.259845	-0.342685		1.0849	1.19735	1.26811
Orphan_70	17.715	17.6186	17.6393	24.4874	24.5181	24.6893		17.6576	6.82982	6.86045	7.0317			-0.512765	-0.482136	-0.310891		1.42678	1.39681	1.24047
Bojihong_30	17.0724	16.975	16.9482	24.5866	24.37	24.5553		16.9985	7.58806	7.37145	7.55681			0.245469	0.0288611	0.214224		0.843542	0.980194	0.862009
Bojihong_60	17.353	17.3627	17.2136	25.2792	25.1574	25.1498		17.3097	7.96951	7.84771	7.84008			0.626921	0.505117	0.497488		0.647557	0.704603	0.708339
Bojihong_70	17.1216	17.0317	16.9578	21.6937	21.6941	21.6955		17.037	4.65661	4.65707	4.6585			-2.68598	-2.68552	-2.68409		6.43516	6.43312	6.42674
